# Supplementary material for: Stereoselective functionalization of platensimycin and platencin by sulfa-Michael/aldol reactions
Source: Royal Society of Chemistry journal article supplement (doi:10.1039/c9ob00324j), 2019-01-01

## Supporting Information

### Stereoselective Functionalization of Platensimycin and Platencin by Sulfa-Michael/Aldol Reactions

Lin Qiu<sup>†</sup>, Zhongqing Wen<sup>†</sup>, Yuling Li<sup>†</sup>, Kai Tian<sup>†</sup>, Youchao Deng<sup>†</sup>, Ben Shen<sup>#, ¶, §</sup>,  
Yanwen Duan<sup>\*, †, †, Δ</sup> and Yong Huang<sup>\*, †, Δ</sup>

<sup>†</sup> Xiangya International Academy of Translational Medicine at Central South University, Changsha, Hunan 410013, China;

<sup>‡</sup>Hunan Engineering Research Center of Combinatorial Biosynthesis and Natural Product Drug Discovery, <sup>Δ</sup> National Engineering Research Center of Combinatorial Biosynthesis for Drug Discovery, Changsha, Hunan 410011, China;

<sup>#</sup> Departments of Chemistry and <sup>¶</sup>Molecular Medicine, and <sup>§</sup>Natural Products Library Initiative at The Scripps Research Institute, The Scripps Research Institute, Jupiter, FL 33458, USA.

\*To whom correspondents should be addressed: Yong Huang, Central South University, Tongzipo Road, #172, Yuelu District, Changsha, Hunan 410013, China. Tel: (86)731 8265 0539; Fax: (86)731 8265 0551; Email: [jonghuang@csu.edu.cn](mailto:jonghuang@csu.edu.cn) or Yanwen Duan, Email: [ywduan66@sina.com](mailto:ywduan66@sina.com)

## Table of contents

|                                                                                                                                                                                                                                        |    |
|----------------------------------------------------------------------------------------------------------------------------------------------------------------------------------------------------------------------------------------|----|
| Computational Data .....                                                                                                                                                                                                               | 4  |
| <b>Table S1.</b> Summary of $^1\text{H}$ NMR (500 MHz) and $^{13}\text{C}$ NMR (101 MHz) data for compound <b>2a</b> in $\text{CD}_3\text{OD}$ ( $\delta$ in ppm, $J$ in Hz). Assignments are based on 1D and 2D NMR experiments.....  | 32 |
| <b>Table S2.</b> Summary of $^1\text{H}$ NMR (400 MHz) and $^{13}\text{C}$ NMR (101 MHz) data for compounds <b>4a</b> in $\text{CDCl}_3$ ( $\delta$ in ppm, $J$ in Hz). Assignments are based on 1D and 2D NMR experiments.....        | 33 |
| <b>Table S3.</b> Summary of $^1\text{H}$ NMR (400 MHz) and $^{13}\text{C}$ NMR (101 MHz) data for compounds <b>6a</b> in $\text{CD}_3\text{OD}$ ( $\delta$ in ppm, $J$ in Hz). Assignments are based on 1D and 2D NMR experiments..... | 34 |
| <b>Table S4.</b> Summary of $^1\text{H}$ NMR (500 MHz) and $^{13}\text{C}$ NMR (126 MHz) data for compounds <b>8a</b> in $\text{CD}_3\text{OD}$ ( $\delta$ in ppm, $J$ in Hz). Assignments are based on 1D and 2D NMR experiments..... | 35 |
| <b>Table S5.</b> Summary of $^1\text{H}$ NMR (400 MHz) and $^{13}\text{C}$ NMR (101 MHz) data for compounds <b>9a</b> in $\text{CD}_3\text{OD}$ ( $\delta$ in ppm, $J$ in Hz). Assignments are based on 1D and 2D NMR experiments..... | 36 |
| <b>Table S6.</b> $^1\text{H}$ NMR spectroscopic data in $\text{CDCl}_3$ ( $\delta$ in ppm, $J$ in Hz) for MTPA-esters <b>5a</b> and <b>5b</b> and their corresponding $\Delta\delta_{\text{S-R}}$ . .....                              | 37 |
| <b>Figure S1.</b> Structures of bioactive thiochromanes and tetra-hydrothiophenes (A) and structures of adamantane derivatives (B).....                                                                                                | 38 |
| <b>Figure S2.</b> $^1\text{H}$ NMR (500 MHz) and $^{13}\text{C}$ NMR (101 MHz) spectrum of <b>2a</b> in $\text{CD}_3\text{OD}$ .....                                                                                                   | 39 |
| <b>Figure S3.</b> $^1\text{H}$ - $^1\text{H}$ COSY spectrum of <b>2a</b> in $\text{CD}_3\text{OD}$ .....                                                                                                                               | 40 |
| <b>Figure S4.</b> $^1\text{H}$ - $^{13}\text{C}$ HSQC spectrum of <b>2a</b> in $\text{CD}_3\text{OD}$ . .....                                                                                                                          | 40 |
| <b>Figure S5.</b> $^1\text{H}$ - $^{13}\text{C}$ HMBC spectrum of <b>2a</b> in $\text{CD}_3\text{OD}$ . .....                                                                                                                          | 41 |
| <b>Figure S6.</b> $^1\text{H}$ - $^1\text{H}$ ROESY spectrum of <b>2a</b> in $\text{CD}_3\text{OD}$ . .....                                                                                                                            | 41 |
| <b>Figure S7.</b> Zoomed in $^1\text{H}$ - $^1\text{H}$ ROESY spectrum of <b>2a</b> in $\text{CD}_3\text{OD}$ (3.0 – 5.5 ppm).....                                                                                                     | 42 |
| <b>Figure S8.</b> $^1\text{H}$ NMR (400 MHz) and $^{13}\text{C}$ NMR (101 MHz) spectrum of <b>4a</b> in $\text{CDCl}_3$ .....                                                                                                          | 43 |
| <b>Figure S9.</b> $^1\text{H}$ - $^1\text{H}$ COSY spectrum of <b>4a</b> in $\text{CDCl}_3$ .....                                                                                                                                      | 44 |
| <b>Figure S10.</b> $^1\text{H}$ - $^{13}\text{C}$ HSQC spectrum of <b>4a</b> in $\text{CDCl}_3$ . .....                                                                                                                                | 44 |
| <b>Figure S11.</b> $^1\text{H}$ - $^{13}\text{C}$ HMBC spectrum of <b>4a</b> in $\text{CDCl}_3$ .....                                                                                                                                  | 45 |
| <b>Figure S12.</b> $^1\text{H}$ - $^1\text{H}$ NOESY spectrum of <b>4a</b> in $\text{CDCl}_3$ . .....                                                                                                                                  | 45 |
| <b>Figure S13.</b> Zoomed in $^1\text{H}$ - $^1\text{H}$ NOESY spectrum of <b>4a</b> in $\text{CDCl}_3$ (3.0 – 5.5 ppm). .....                                                                                                         | 46 |
| <b>Figure S14.</b> $^1\text{H}$ NMR (400 MHz) and $^{13}\text{C}$ NMR (101 MHz) spectrum of <b>5a</b> in $\text{CDCl}_3$ .....                                                                                                         | 47 |
| <b>Figure S15.</b> $^1\text{H}$ - $^1\text{H}$ COSY spectrum of <b>5a</b> in $\text{CDCl}_3$ .....                                                                                                                                     | 48 |
| <b>Figure S16.</b> $^1\text{H}$ - $^{13}\text{C}$ HSQC spectrum of <b>5a</b> in $\text{CDCl}_3$ . .....                                                                                                                                | 48 |
| <b>Figure S17.</b> $^1\text{H}$ NMR (400 MHz) and $^{13}\text{C}$ NMR (101 MHz) spectrum of <b>5b</b> in $\text{CDCl}_3$ . .....                                                                                                       | 49 |
| <b>Figure S18.</b> $^1\text{H}$ - $^1\text{H}$ COSY spectrum of <b>5b</b> in $\text{CDCl}_3$ . .....                                                                                                                                   | 50 |
| <b>Figure S19.</b> $^1\text{H}$ - $^{13}\text{C}$ HSQC spectrum of <b>5b</b> in $\text{CDCl}_3$ . .....                                                                                                                                | 50 |
| <b>Figure S20.</b> $^1\text{H}$ NMR (400 MHz) and $^{13}\text{C}$ NMR (101 MHz) spectrum of <b>6a</b> in $\text{CD}_3\text{OD}$ .....                                                                                                  | 51 |
| <b>Figure S21.</b> $^1\text{H}$ - $^1\text{H}$ COSY spectrum of <b>6a</b> in $\text{CD}_3\text{OD}$ .....                                                                                                                              | 52 |
| <b>Figure S22.</b> $^1\text{H}$ - $^{13}\text{C}$ HSQC spectrum of <b>6a</b> in $\text{CD}_3\text{OD}$ . .....                                                                                                                         | 52 |
| <b>Figure S23.</b> $^1\text{H}$ - $^{13}\text{C}$ HMBC spectrum of <b>6a</b> in $\text{CD}_3\text{OD}$ . .....                                                                                                                         | 53 |
| <b>Figure S24.</b> $^1\text{H}$ - $^1\text{H}$ NOESY spectrum of <b>6a</b> in $\text{CD}_3\text{OD}$ . .....                                                                                                                           | 53 |
| <b>Figure S25.</b> Zoomed in $^1\text{H}$ - $^1\text{H}$ NOESY spectrum of <b>6a</b> in $\text{CDCl}_3$ (3.0 – 5.5 ppm). .....                                                                                                         | 54 |
| <b>Figure S26.</b> $^1\text{H}$ NMR (500 MHz) and $^{13}\text{C}$ NMR (126 MHz) spectrum of <b>8a</b> in $\text{CD}_3\text{OD}$ .....                                                                                                  | 55 |
| <b>Figure S27.</b> $^1\text{H}$ - $^1\text{H}$ COSY spectrum of <b>8a</b> in $\text{CD}_3\text{OD}$ .....                                                                                                                              | 56 |
| <b>Figure S28.</b> $^1\text{H}$ - $^{13}\text{C}$ HSQC spectrum of <b>8a</b> in $\text{CD}_3\text{OD}$ . .....                                                                                                                         | 56 |

|                                                                                                                                    |    |
|------------------------------------------------------------------------------------------------------------------------------------|----|
| <b>Figure S29.</b> $^1\text{H}$ - $^{13}\text{C}$ HMBC spectrum of <b>8a</b> in $\text{CD}_3\text{OD}$ .                           | 57 |
| <b>Figure S30.</b> $^1\text{H}$ - $^1\text{H}$ ROESY spectrum of <b>8a</b> in $\text{CD}_3\text{OD}$ .                             | 57 |
| <b>Figure S31.</b> Zoomed in $^1\text{H}$ - $^1\text{H}$ ROESY spectrum of <b>8a</b> in $\text{CDCl}_3$ (3.0 – 5.5 ppm).           | 58 |
| <b>Figure S32.</b> $^1\text{H}$ NMR (400 MHz) and $^{13}\text{C}$ NMR (101 MHz) spectrum of <b>9a</b> in $\text{CD}_3\text{OD}$ .  | 59 |
| <b>Figure S33.</b> $^1\text{H}$ - $^1\text{H}$ COSY spectrum of <b>9a</b> in $\text{CD}_3\text{OD}$ .                              | 60 |
| <b>Figure S34.</b> $^1\text{H}$ - $^{13}\text{C}$ HSQC spectrum of <b>9a</b> in $\text{CD}_3\text{OD}$ .                           | 60 |
| <b>Figure S35.</b> $^1\text{H}$ - $^{13}\text{C}$ HMBC spectrum of <b>9a</b> in $\text{CD}_3\text{OD}$ .                           | 61 |
| <b>Figure S36.</b> $^1\text{H}$ - $^1\text{H}$ NOESY spectrum of <b>9a</b> in $\text{CD}_3\text{OD}$ .                             | 61 |
| <b>Figure S37.</b> Zoomed in $^1\text{H}$ - $^1\text{H}$ NOESY spectrum of <b>9a</b> in $\text{CD}_3\text{OD}$ (3.0 – 5.5 ppm).    | 62 |
| <b>Figure S38.</b> $^1\text{H}$ NMR (400 MHz) and $^{13}\text{C}$ NMR (101 MHz) spectrum of <b>2b</b> in $\text{CD}_3\text{OD}$ .  | 63 |
| <b>Figure S39.</b> $^1\text{H}$ NMR (400 MHz) and $^{13}\text{C}$ NMR (101 MHz) spectrum of <b>2c</b> in $\text{CD}_3\text{OD}$ .  | 64 |
| <b>Figure S40.</b> $^1\text{H}$ NMR (400 MHz) and $^{13}\text{C}$ NMR (101 MHz) spectrum of <b>2d</b> in $\text{CD}_3\text{OD}$ .  | 65 |
| <b>Figure S41.</b> $^1\text{H}$ NMR (500 MHz) and $^{13}\text{C}$ NMR (126 MHz) spectrum of <b>2e</b> in $\text{CD}_3\text{OD}$ .  | 66 |
| <b>Figure S42.</b> $^1\text{H}$ NMR (500 MHz) and $^{13}\text{C}$ NMR (126 MHz) spectrum of <b>2f</b> in $\text{CD}_3\text{OD}$ .  | 67 |
| <b>Figure S43.</b> $^1\text{H}$ NMR (400 MHz) and $^{13}\text{C}$ NMR (101 MHz) spectrum of <b>10a</b> in $\text{CDCl}_3$ .        | 68 |
| <b>Figure S44.</b> $^1\text{H}$ NMR (500 MHz) and $^{13}\text{C}$ NMR (126 MHz) spectrum of <b>11a</b> in $\text{CD}_3\text{OD}$ . | 69 |

## Computational Data

- M06-2X/6-31+G(d) solution-phase potential energy (E)
- M06-2X/6-31+G(d) solution-phase enthalpy at 298.15 K (H)
- M06-2X/6-31+G(d) solution-phase Gibbs free energy at 298.15 K and 1 mol/L (G)

### Compound 12

(M06-2X/6-31+G(d))/CPCM (water)

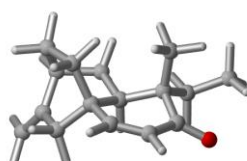

|   |             |             |             |
|---|-------------|-------------|-------------|
| C | -2.16655600 | -1.48580900 | -0.60689100 |
| C | -1.49231100 | -0.28251700 | 0.08737700  |
| C | -2.05967700 | 1.03674400  | -0.44332800 |
| C | -1.25945100 | 2.26048800  | -0.20121800 |
| O | -3.13922500 | 1.11372200  | -1.01358300 |
| C | 0.04275600  | 2.20968400  | 0.11073000  |
| C | 0.02075900  | -0.28781700 | -0.27282400 |
| C | 0.83641400  | 0.94496100  | 0.19421700  |
| C | 2.29289700  | -1.21424800 | 0.31048100  |
| C | 2.71439200  | -0.32624000 | -0.83718900 |
| C | 2.05277500  | 1.03987000  | -0.76376700 |
| C | -1.78318900 | -0.29115300 | 1.60172400  |
| C | 2.44623100  | -0.41200000 | 1.61360200  |
| C | 1.42329400  | 0.75038500  | 1.61683100  |
| C | 0.79833000  | -1.56192400 | 0.13449000  |
| C | 3.54648600  | -0.69982200 | -1.81087600 |
| H | 0.59116800  | 3.13814000  | 0.28026700  |
| H | -1.78250500 | 3.20642600  | -0.31765100 |
| H | -1.54873000 | -2.37169600 | -0.41997800 |
| H | -2.13643400 | -1.30931200 | -1.68996700 |
| H | 0.03991300  | -0.24379400 | -1.37476300 |
| H | 2.89826300  | -2.12594000 | 0.33787500  |
| H | 1.73703500  | 1.37227600  | -1.75986800 |
| H | 2.75910100  | 1.78777100  | -0.37652100 |
| H | -1.37603800 | 0.59006100  | 2.10131300  |
| H | -1.36790000 | -1.18676100 | 2.07678900  |
| H | -2.86302800 | -0.29119500 | 1.77598000  |
| H | 3.47051700  | -0.03137600 | 1.69400400  |

|   |             |             |             |
|---|-------------|-------------|-------------|
| H | 2.27636600  | -1.07073600 | 2.47209600  |
| H | 0.62445200  | 0.55289000  | 2.33391900  |
| H | 1.90189400  | 1.68614900  | 1.92890700  |
| H | 0.68184100  | -2.33813400 | -0.62757600 |
| H | 0.41929200  | -1.97256200 | 1.07992800  |
| H | 3.79772500  | -0.03243800 | -2.63270300 |
| H | 4.00491300  | -1.68629200 | -1.81241900 |
| C | -3.59966900 | -1.81919700 | -0.18497100 |
| H | -4.25799200 | -0.95065200 | -0.25964100 |
| H | -3.99880500 | -2.60564200 | -0.83391700 |
| H | -3.63813300 | -2.19540000 | 0.84226600  |

0 imaginary frequency

E = -697.863052

H = -697.497211

G = -697.554560

### CHOCH2S<sup>-</sup>

(M06-2X/6-31+G(d)/CPCM (water))

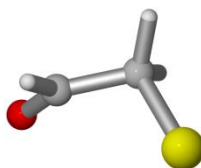

|   |             |             |             |
|---|-------------|-------------|-------------|
| S | 1.48107300  | -0.29122500 | -0.02914100 |
| C | 0.02807400  | 0.84758200  | -0.09358500 |
| C | -1.11448300 | 0.02992100  | 0.40498100  |
| O | -2.01332500 | -0.41049400 | -0.29233700 |
| H | -0.18022400 | 1.19382400  | -1.10950600 |
| H | 0.18762300  | 1.70839600  | 0.56397000  |
| H | -1.07951000 | -0.22367800 | 1.48210400  |

0 imaginary frequency

E = -551.461199

H = -551.408190

G = -551.441322

### TS-M1

(M06-2X /6-31+G(d)/CPCM (water))

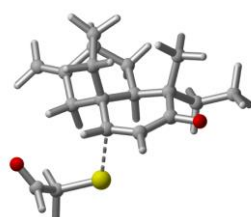

|   |             |             |             |
|---|-------------|-------------|-------------|
| C | 2.97091400  | -0.66357100 | -1.32669700 |
| C | 2.17478300  | -0.32002700 | -0.03470900 |
| C | 1.79249100  | -1.62499200 | 0.69946500  |
| C | 0.46032100  | -1.85101300 | 1.11678000  |
| O | 2.71949300  | -2.43559000 | 0.96349800  |
| C | -0.62388400 | -0.99707300 | 0.83697900  |
| C | 0.90818600  | 0.44680200  | -0.52246100 |
| C | -0.31474900 | 0.42140100  | 0.41695500  |
| C | 0.25864100  | 2.89647000  | -0.19426200 |
| C | -1.18568300 | 2.58342000  | -0.49198600 |
| C | -1.47717400 | 1.10374100  | -0.33232400 |
| C | 3.07847300  | 0.46383800  | 0.93451600  |
| C | 0.46927400  | 2.66411200  | 1.31374500  |
| C | -0.08360100 | 1.27023800  | 1.69681300  |
| C | 1.15860800  | 1.91745200  | -0.97560400 |
| C | -2.09868000 | 3.49634400  | -0.83278400 |
| C | -3.43957600 | -1.54489800 | -1.09425900 |
| H | -1.50102700 | -1.08087600 | 1.48019400  |
| S | -1.67874700 | -2.05373600 | -0.89703200 |
| C | -4.04725600 | -1.69250900 | 0.26346500  |
| O | -4.33504900 | -0.76181100 | 0.99367500  |
| H | 2.93361600  | 0.22318100  | -1.97615400 |
| H | 2.41791100  | -1.45062900 | -1.85906600 |
| H | 0.27597700  | -2.78333200 | 1.64756200  |
| H | 0.57158700  | -0.11813300 | -1.40401300 |
| H | 0.49745500  | 3.93184200  | -0.46142200 |
| H | -1.57713800 | 0.64260600  | -1.32261600 |
| H | -2.42406500 | 0.93695500  | 0.19872100  |
| H | 2.53876200  | 0.78279200  | 1.82932500  |
| H | 3.51851200  | 1.34980500  | 0.46465200  |
| H | 3.89883000  | -0.18260800 | 1.25723600  |
| H | -0.03501100 | 3.44911400  | 1.88708300  |
| H | 1.54040300  | 2.73566600  | 1.53699400  |
| H | 0.58162300  | 0.75098100  | 2.39169000  |
| H | -1.05041000 | 1.37302600  | 2.20764200  |
| H | 0.95978700  | 2.02426300  | -2.04846600 |
| H | 2.20306800  | 2.20876100  | -0.82451200 |

|   |             |             |             |
|---|-------------|-------------|-------------|
| H | -3.13885700 | 3.22463800  | -1.00321300 |
| H | -1.83276700 | 4.54418300  | -0.95535100 |
| H | -3.54054100 | -0.51694400 | -1.45097700 |
| H | -3.91765700 | -2.23631600 | -1.79600100 |
| H | -4.17019700 | -2.73364400 | 0.61789600  |
| C | 4.43418100  | -1.08301000 | -1.18264300 |
| H | 4.53360400  | -1.94861500 | -0.52451700 |
| H | 4.84362700  | -1.33806600 | -2.16668900 |
| H | 5.04571000  | -0.27001400 | -0.77681000 |

1 imaginary frequency (-227.95)

E = -1249.306611

H = -1248.887563

G = -1248.956601

### TS-M2

(M06-2X /6-31+G(d)/CPCM (water))

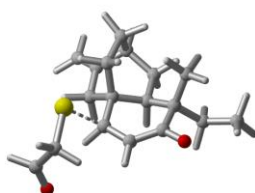

|   |             |             |             |
|---|-------------|-------------|-------------|
| C | 2.83491700  | -1.68230100 | -1.03427600 |
| C | 1.78227100  | -1.14976200 | -0.01448200 |
| C | 0.60790500  | -2.15340500 | 0.02439200  |
| C | -0.69486900 | -1.70795100 | -0.30194000 |
| O | 0.87776600  | -3.36360700 | 0.23924500  |
| C | -1.11119900 | -0.36161300 | -0.32344100 |
| C | 1.30030300  | 0.21024100  | -0.59551700 |
| C | -0.06880500 | 0.72505900  | -0.07200500 |
| C | 1.76092500  | 2.58855700  | 0.19052800  |
| C | 0.57108500  | 3.09182200  | -0.59120300 |
| C | -0.41848000 | 1.98022500  | -0.89816100 |
| C | 2.41270000  | -1.09371800 | 1.38613900  |
| C | 1.26860400  | 2.12474600  | 1.57402800  |
| C | 0.03824800  | 1.20735600  | 1.39398500  |
| C | 2.34702600  | 1.36095500  | -0.52700300 |
| C | 0.39947800  | 4.36466900  | -0.95609200 |
| C | -3.89363000 | -1.22639900 | 0.58365600  |
| H | -1.85802600 | -0.09583200 | -1.07125900 |
| S | -2.72405200 | -0.00023100 | 1.27317100  |

|   |             |             |             |
|---|-------------|-------------|-------------|
| C | -4.48440000 | -0.61196600 | -0.64554600 |
| O | -4.20880800 | -0.94895700 | -1.78246700 |
| H | 3.45356700  | -0.82808500 | -1.34285000 |
| H | 2.29159800  | -2.00179600 | -1.93461800 |
| H | -1.41851300 | -2.48955800 | -0.52838400 |
| H | 1.12122000  | -0.00242200 | -1.65910700 |
| H | 2.51802500  | 3.37390500  | 0.29114600  |
| H | -0.38784400 | 1.73311000  | -1.96920300 |
| H | -1.44461600 | 2.29758000  | -0.66861200 |
| H | 1.73469900  | -0.67682100 | 2.13364300  |
| H | 3.33806400  | -0.50693000 | 1.39658100  |
| H | 2.66219400  | -2.11128600 | 1.69969700  |
| H | 1.00920200  | 2.98933800  | 2.19415900  |
| H | 2.08705600  | 1.59718000  | 2.07828300  |
| H | 0.04830600  | 0.36340700  | 2.08837100  |
| H | -0.86816500 | 1.78084200  | 1.61936700  |
| H | 2.66790000  | 1.64278000  | -1.53645200 |
| H | 3.24795300  | 1.04500000  | 0.01037800  |
| H | -0.48707300 | 4.68552900  | -1.49990500 |
| H | 1.14359600  | 5.12437500  | -0.72654900 |
| H | -3.38564700 | -2.16455300 | 0.33898300  |
| H | -4.67605400 | -1.41381900 | 1.32508500  |
| H | -5.16834000 | 0.24005100  | -0.47058600 |
| C | 3.77259200  | -2.80354400 | -0.58529300 |
| H | 3.21170700  | -3.67438300 | -0.24036600 |
| H | 4.41071300  | -3.10616900 | -1.42323900 |
| H | 4.43362000  | -2.47506100 | 0.22386700  |

1 imaginary frequency (-261.00)

E = -1249.300753

H = -1248.881191

G = -1248.951732

### TS-M1 intermediate

(M06-2X /6-31+G(d)/CPCM (water))

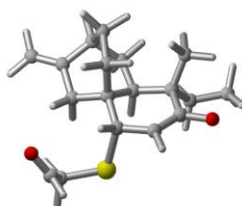



|   |             |             |             |
|---|-------------|-------------|-------------|
| C | 3.01419800  | -0.52665500 | -1.27721500 |
| C | 2.14800600  | -0.25946500 | -0.01144900 |
| C | 1.77557400  | -1.60295500 | 0.66180100  |
| C | 0.45695300  | -1.90828400 | 0.94068700  |
| O | 2.75741400  | -2.37072800 | 0.97701400  |
| C | -0.73008600 | -1.10039400 | 0.56452100  |
| C | 0.88588400  | 0.49157500  | -0.54382700 |
| C | -0.39552700 | 0.37417400  | 0.30985900  |
| C | 0.17123800  | 2.89966100  | -0.07171800 |
| C | -1.24678700 | 2.59865300  | -0.47837300 |
| C | -1.52540800 | 1.10828700  | -0.44211100 |
| C | 2.98618300  | 0.51638100  | 1.02047000  |
| C | 0.29810800  | 2.54551000  | 1.42251000  |
| C | -0.24214200 | 1.11252400  | 1.65911400  |
| C | 1.11474300  | 1.99479600  | -0.89003700 |
| C | -2.15161700 | 3.52385400  | -0.80730300 |
| C | -3.24749200 | -1.59072200 | -1.04012400 |
| H | -1.52026900 | -1.15638300 | 1.32673600  |
| S | -1.46330100 | -2.02122600 | -0.92500500 |
| C | -3.88496600 | -1.80387900 | 0.29934800  |
| O | -4.35041400 | -0.91180600 | 0.97904900  |
| H | 2.98353700  | 0.38374400  | -1.89494000 |
| H | 2.50783600  | -1.30652100 | -1.86455600 |
| H | 0.26548400  | -2.86953700 | 1.41755600  |
| H | 0.63486800  | -0.02617400 | -1.48160500 |
| H | 0.40992400  | 3.95601800  | -0.23878600 |
| H | -1.58819200 | 0.72426400  | -1.46938700 |
| H | -2.49082600 | 0.91031700  | 0.04325500  |
| H | 2.40432800  | 0.77142100  | 1.90934700  |
| H | 3.41366000  | 1.43890900  | 0.61228900  |
| H | 3.81462400  | -0.11904500 | 1.34320900  |
| H | -0.26130900 | 3.27110800  | 2.02281600  |
| H | 1.35056600  | 2.62614400  | 1.71725500  |
| H | 0.40194300  | 0.54510800  | 2.33670700  |
| H | -1.23331300 | 1.15738500  | 2.13145700  |
| H | 0.93836300  | 2.17220000  | -1.95783400 |
| H | 2.14902900  | 2.29527800  | -0.69639500 |
| H | -3.17469300 | 3.25439100  | -1.06325200 |
| H | -1.89519100 | 4.58093500  | -0.83169700 |
| H | -3.42551500 | -0.57619900 | -1.39875200 |
| H | -3.65847900 | -2.31424900 | -1.75269900 |
| H | -3.87344500 | -2.84508300 | 0.67310500  |
| C | 4.48050900  | -0.91464800 | -1.08357800 |
| H | 4.56689400  | -1.80313800 | -0.45499900 |

|   |            |             |             |
|---|------------|-------------|-------------|
| H | 4.94251100 | -1.11731000 | -2.05689600 |
| H | 5.05026300 | -0.10417900 | -0.61582100 |

0 imaginary frequency

E = -1249.312189

H = -1248.891900

G = -1248.961303

### TS-A1

(M06-2X /6-31+G(d)/CPCM (water))

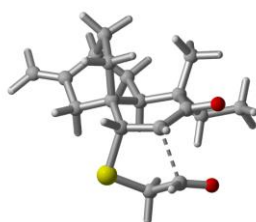

|   |             |             |             |
|---|-------------|-------------|-------------|
| C | 1.50233200  | 1.74062200  | -1.34176900 |
| C | 0.68320700  | 1.39971200  | -0.06255500 |
| C | 1.57918100  | 0.64448700  | 0.94874900  |
| C | 1.34788100  | -0.71562900 | 1.26596300  |
| O | 2.54449500  | 1.27438300  | 1.44704400  |
| C | 0.07735700  | -1.43326400 | 0.94515200  |
| C | -0.50884100 | 0.51526200  | -0.56159800 |
| C | -1.05244100 | -0.51145400 | 0.45325100  |
| C | -3.00021100 | 1.04529200  | -0.34699700 |
| C | -3.37434300 | -0.40489000 | -0.49969600 |
| C | -2.18307400 | -1.30489700 | -0.24116000 |
| C | 0.28882600  | 2.71306300  | 0.63894500  |
| C | -2.72100400 | 1.27118300  | 1.15114000  |
| C | -1.70932400 | 0.20933900  | 1.65288900  |
| C | -1.71286300 | 1.30812100  | -1.15653200 |
| C | -4.60050300 | -0.84188900 | -0.79701400 |
| S | 0.45789700  | -2.86451600 | -0.23939400 |
| C | 1.92069800  | -2.15050100 | -1.01236800 |
| C | 2.91166300  | -1.62987200 | 0.01832000  |
| O | 3.83807100  | -0.86330400 | -0.31629600 |
| H | -0.29273100 | -1.97440300 | 1.82491200  |
| H | 1.86980100  | -1.04737500 | 2.16108700  |
| H | 0.77720400  | 2.01694700  | -2.12226300 |
| H | 1.98771300  | 0.81773300  | -1.68480600 |
| H | -0.09189000 | -0.09437400 | -1.37647900 |

|   |             |             |             |
|---|-------------|-------------|-------------|
| H | -3.81066000 | 1.69807200  | -0.69005800 |
| H | -1.81416900 | -1.70214100 | -1.19413500 |
| H | -2.47134400 | -2.17077800 | 0.37127200  |
| H | -0.31471100 | 2.54015800  | 1.53322700  |
| H | -0.25738100 | 3.39295900  | -0.02235200 |
| H | 1.20088700  | 3.21925600  | 0.96019800  |
| H | -3.65893600 | 1.20174500  | 1.71233200  |
| H | -2.33762000 | 2.28700500  | 1.29211100  |
| H | -0.94644400 | 0.65682000  | 2.29878400  |
| H | -2.22626900 | -0.54672300 | 2.25920900  |
| H | -1.88393600 | 1.01197000  | -2.19832100 |
| H | -1.51492000 | 2.38337700  | -1.17207600 |
| H | -4.82748400 | -1.90472000 | -0.85629100 |
| H | -5.41512400 | -0.14760000 | -0.99240600 |
| H | 1.67507700  | -1.36416600 | -1.73170300 |
| H | 2.40723800  | -2.97012700 | -1.55801200 |
| H | 3.07350600  | -2.34597000 | 0.84611500  |
| C | 2.55420100  | 2.84566800  | -1.24915200 |
| H | 3.27966800  | 2.63695700  | -0.45963400 |
| H | 3.08864400  | 2.92520300  | -2.20258600 |
| H | 2.10054100  | 3.82169300  | -1.04720800 |

1 imaginary frequency (-184.15)

E = -1249.312098

H = -1248.892837

G = -1248.957211

### TS-A2

(M06-2X /6-31+G(d)/CPCM (water))

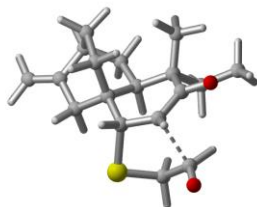

|   |             |             |             |
|---|-------------|-------------|-------------|
| C | 1.23424400  | 2.02221600  | -1.37510100 |
| C | 0.51553000  | 1.54508900  | -0.07834300 |
| C | 1.53996000  | 0.86410100  | 0.85954800  |
| C | 1.48362000  | -0.52758400 | 1.11801900  |
| O | 2.46464000  | 1.58109700  | 1.32349000  |
| C | 0.28309700  | -1.37666500 | 0.84578600  |
| C | -0.58971100 | 0.54819300  | -0.56421800 |

|   |             |             |             |
|---|-------------|-------------|-------------|
| C | -0.96355400 | -0.57590600 | 0.42653700  |
| C | -3.11449900 | 0.76966900  | -0.22526500 |
| C | -3.31875000 | -0.70709800 | -0.43582300 |
| C | -2.02202700 | -1.47018700 | -0.25463600 |
| C | 0.00675500  | 2.78141600  | 0.68538900  |
| C | -2.80125400 | 0.96417800  | 1.27076100  |
| C | -1.64206700 | 0.01999800  | 1.68088800  |
| C | -1.90406800 | 1.22033500  | -1.06923600 |
| C | -4.49362500 | -1.27453900 | -0.71939400 |
| S | 0.77519200  | -2.74974300 | -0.35262400 |
| C | 2.08238500  | -1.83125100 | -1.20056500 |
| C | 3.06161000  | -1.19536800 | -0.21999700 |
| O | 3.84914500  | -1.90744700 | 0.44154800  |
| H | 0.01590200  | -1.95577200 | 1.73900400  |
| H | 2.12017200  | -0.85318600 | 1.93558400  |
| H | 0.44720000  | 2.25681400  | -2.10773100 |
| H | 1.78642200  | 1.16869000  | -1.79296600 |
| H | -0.14667300 | 0.02692200  | -1.42461800 |
| H | -4.01045900 | 1.33378700  | -0.50710500 |
| H | -1.64585600 | -1.79398000 | -1.23238700 |
| H | -2.18495100 | -2.38213400 | 0.33673600  |
| H | -0.56073400 | 2.51097300  | 1.57865100  |
| H | -0.61749900 | 3.42796600  | 0.06087700  |
| H | 0.86962000  | 3.36469100  | 1.01251400  |
| H | -3.69754700 | 0.75027900  | 1.86262800  |
| H | -2.54434600 | 2.01404200  | 1.44703000  |
| H | -0.90658300 | 0.53770900  | 2.30616500  |
| H | -2.02979300 | -0.81309000 | 2.28238100  |
| H | -2.08611000 | 0.95321000  | -2.11692200 |
| H | -1.83410000 | 2.31108600  | -1.03935200 |
| H | -4.59436700 | -2.35327700 | -0.82420200 |
| H | -5.39171400 | -0.67596500 | -0.85711900 |
| H | 1.65455600  | -1.07063700 | -1.85994700 |
| H | 2.62793800  | -2.55807200 | -1.81418300 |
| H | 3.37292100  | -0.16839400 | -0.49141300 |
| C | 2.17577500  | 3.22170000  | -1.27592200 |
| H | 2.95062700  | 3.05588100  | -0.52408000 |
| H | 2.65652300  | 3.39270900  | -2.24549600 |
| H | 1.63499600  | 4.13663900  | -1.01294500 |

1 imaginary frequency (-222.09)

E= -1249.310170

H = -1248.890423

G = -1248.955618

**TS-A3**

(M06-2X /6-31+G(d)/CPCM (water))

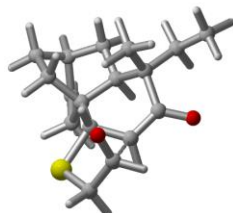

|   |             |             |             |
|---|-------------|-------------|-------------|
| C | -0.67523900 | 3.13428100  | -0.32047500 |
| C | -0.03288800 | 1.79471700  | 0.09909900  |
| C | 1.14015100  | 1.42890200  | -0.85920300 |
| C | 1.56910300  | 0.08374900  | -0.84059900 |
| O | 1.57857300  | 2.29033800  | -1.66952900 |
| C | 0.90713800  | -0.87561700 | 0.09888800  |
| C | -1.07809100 | 0.66131100  | -0.15708700 |
| C | -0.62626300 | -0.79601000 | 0.18252300  |
| C | -3.20690500 | -0.51162500 | 0.47214500  |
| C | -2.85921000 | -1.28449800 | -0.78230600 |
| C | -1.39189300 | -1.69214600 | -0.80927600 |
| C | 0.44287300  | 1.90719600  | 1.55705700  |
| C | -2.63111300 | -1.28513800 | 1.67016200  |
| C | -1.09086600 | -1.19029900 | 1.60407700  |
| C | -2.49574300 | 0.86188800  | 0.41998600  |
| C | -3.73077000 | -1.56249700 | -1.75450100 |
| S | 1.59661900  | -2.55036400 | -0.21947000 |
| C | 3.32540800  | -1.95383500 | -0.46643800 |
| C | 3.56004800  | -0.57802300 | 0.15113400  |
| O | 3.50597800  | -0.42255600 | 1.37909400  |
| H | 1.26767300  | -0.66431100 | 1.11434500  |
| H | 1.98544700  | -0.27894900 | -1.77824900 |
| H | -1.64056900 | 3.22629400  | 0.19333100  |
| H | -0.89534400 | 3.08668300  | -1.39443800 |
| H | -1.19860300 | 0.67160400  | -1.25237600 |
| H | -4.29143500 | -0.38748700 | 0.56222600  |
| H | -0.97790300 | -1.59925300 | -1.82138800 |
| H | -1.29320600 | -2.74710300 | -0.51147300 |
| H | 0.92950600  | 1.00270900  | 1.92557300  |
| H | -0.39776800 | 2.13746700  | 2.22506700  |
| H | 1.17040800  | 2.71976300  | 1.65006900  |
| H | -2.96596700 | -2.32860800 | 1.63553200  |

|   |             |             |             |
|---|-------------|-------------|-------------|
| H | -3.00682500 | -0.85583500 | 2.60572300  |
| H | -0.72403600 | -0.44798500 | 2.32132800  |
| H | -0.62735800 | -2.14736700 | 1.87677300  |
| H | -3.06532600 | 1.55717500  | -0.20492200 |
| H | -2.46191700 | 1.28511900  | 1.43464700  |
| H | -3.43021600 | -2.10187800 | -2.65079600 |
| H | -4.77407500 | -1.26254500 | -1.68160900 |
| H | 3.55550800  | -1.93262000 | -1.53382200 |
| H | 3.99216400  | -2.66993200 | 0.02468900  |
| H | 4.10169900  | 0.14044800  | -0.48424000 |
| C | 0.13132500  | 4.40202900  | -0.02522600 |
| H | 1.15513900  | 4.31116400  | -0.39441600 |
| H | -0.33556900 | 5.26447400  | -0.51413400 |
| H | 0.16387700  | 4.61823700  | 1.04778500  |

1 imaginary frequency (-200.00)

E = -1249.294893

H = -1248.875635

G = -1248.941323

#### TS-A4

(M06-2X /6-31+G(d)/CPCM (water))

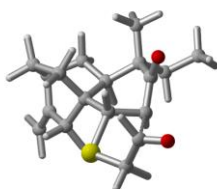

|   |             |             |             |
|---|-------------|-------------|-------------|
| C | 1.01642500  | 2.74199100  | 1.28718200  |
| C | 0.73963100  | 1.92333300  | 0.00315800  |
| C | -0.77753600 | 1.72595500  | -0.17885700 |
| C | -1.39335300 | 0.71548700  | 0.68388600  |
| O | -1.34184900 | 2.23704900  | -1.15963400 |
| C | -1.05822900 | -0.51413300 | -0.14317600 |
| C | 1.33323200  | 0.47516200  | 0.23017800  |
| C | 0.49480500  | -0.77897100 | -0.23497200 |
| C | 3.08411300  | -1.19801800 | -0.48774000 |
| C | 2.51063500  | -1.95451800 | 0.68260400  |
| C | 0.99200600  | -1.92392200 | 0.67626800  |
| C | 1.32607800  | 2.65824200  | -1.20432700 |

|   |             |             |             |
|---|-------------|-------------|-------------|
| C | 2.34013800  | -1.64331100 | -1.76096900 |
| C | 0.87451000  | -1.15071700 | -1.68415600 |
| C | 2.78242900  | 0.30095300  | -0.28366900 |
| C | 3.24223400  | -2.55820900 | 1.62227300  |
| S | -1.95317300 | -2.08343200 | 0.37727800  |
| C | -3.60953000 | -1.42210400 | 0.68678100  |
| C | -4.15411900 | -0.56309800 | -0.42701000 |
| O | -5.09125100 | 0.19260300  | -0.27878300 |
| H | -1.40139300 | -0.35188500 | -1.17169100 |
| H | -0.81055700 | 0.62173800  | 1.61516300  |
| H | 2.09718700  | 2.70644900  | 1.48757000  |
| H | 0.52823900  | 2.24037800  | 2.13190400  |
| H | 1.38188400  | 0.36871500  | 1.32260200  |
| H | 4.16179700  | -1.37182900 | -0.57932200 |
| H | 0.60385800  | -1.80625300 | 1.69528200  |
| H | 0.61547400  | -2.88511100 | 0.29672300  |
| H | 1.27944100  | 2.04880300  | -2.11291200 |
| H | 2.37224100  | 2.93495000  | -1.02706700 |
| H | 0.75863800  | 3.57089200  | -1.40075900 |
| H | 2.38061300  | -2.73549300 | -1.84947400 |
| H | 2.84193600  | -1.22909500 | -2.64290800 |
| H | 0.72316800  | -0.27269200 | -2.32594000 |
| H | 0.18695000  | -1.92541900 | -2.04837100 |
| H | 3.48992200  | 0.74944500  | 0.42394400  |
| H | 2.92760500  | 0.79978200  | -1.24816400 |
| H | 2.77787800  | -3.06235800 | 2.46771400  |
| H | 4.32894800  | -2.56962800 | 1.57184400  |
| H | -3.65431800 | -0.85818100 | 1.61994900  |
| H | -4.26716900 | -2.29719400 | 0.77725100  |
| H | -3.69325200 | -0.69365200 | -1.42456100 |
| C | 0.55433000  | 4.19799900  | 1.23448700  |
| H | -0.50299700 | 4.26681400  | 0.95100600  |
| H | 0.66925000  | 4.67134600  | 2.21494500  |
| H | 1.13342700  | 4.78445100  | 0.51450600  |

1 imaginary frequency (-55.27)

E = -1249.254263

H = -1248.835675

G = -1248.903047

## Computational Data

- M06-2X/6-311+G(d,p) solution-phase potential energy (E)
- M06-2X/6-311+G(d,p) solution-phase enthalpy at 298.15 K (H)
- M06-2X/6-311+G(d,p) solution-phase Gibbs free energy at 298.15 K and 1 mol/L (G)

### Compound 12

(M06-2X /6-311+G(d,p)/CPCM (water))

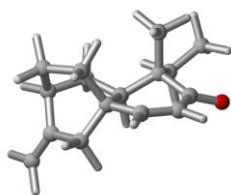

|   |             |             |             |
|---|-------------|-------------|-------------|
| C | -2.16561000 | -1.48630000 | -0.59984000 |
| C | -1.49114000 | -0.28210100 | 0.09016600  |
| C | -2.05415600 | 1.03482100  | -0.44873800 |
| C | -1.25595000 | 2.25751500  | -0.19414000 |
| O | -3.11733700 | 1.11079200  | -1.03591700 |
| C | 0.04157200  | 2.20594300  | 0.11951700  |
| C | 0.02060100  | -0.28896000 | -0.27011800 |
| C | 0.83504800  | 0.94230200  | 0.19893300  |
| C | 2.29148300  | -1.21504500 | 0.30610900  |
| C | 2.70561700  | -0.32586400 | -0.84178000 |
| C | 2.04934900  | 1.04082500  | -0.76023700 |
| C | -1.78184800 | -0.28212400 | 1.60364500  |
| C | 2.45130700  | -0.41330200 | 1.60802800  |
| C | 1.42263200  | 0.74298800  | 1.61953800  |
| C | 0.79646100  | -1.56267000 | 0.13746600  |
| C | 3.52596600  | -0.69793500 | -1.82074700 |
| H | 0.58902000  | 3.13117600  | 0.29431700  |
| H | -1.77798600 | 3.20164800  | -0.30806400 |
| H | -1.55193000 | -2.37035800 | -0.40698400 |
| H | -2.13237400 | -1.31368700 | -1.68050600 |
| H | 0.04045900  | -0.24374900 | -1.36897300 |
| H | 2.89645100  | -2.12340500 | 0.32753000  |
| H | 1.73335200  | 1.37651500  | -1.75180000 |
| H | 2.75762600  | 1.78049300  | -0.36855300 |
| H | -1.37797100 | 0.60188800  | 2.09499700  |
| H | -1.36595600 | -1.17235600 | 2.08193800  |
| H | -2.85942500 | -0.28352600 | 1.77581800  |



|   |             |             |             |
|---|-------------|-------------|-------------|
| H | 3.47132800  | -0.02750800 | 1.67867700  |
| H | 2.29120500  | -1.07144900 | 2.46503000  |
| H | 0.62732300  | 0.53450700  | 2.33301600  |
| H | 1.89601700  | 1.67651000  | 1.93592200  |
| H | 0.67649700  | -2.33803100 | -0.62087800 |
| H | 0.42198100  | -1.96738700 | 1.08403200  |
| H | 3.76939500  | -0.02866700 | -2.63996300 |
| H | 3.97955800  | -1.68371400 | -1.82721600 |
| C | -3.60004900 | -1.81114000 | -0.17791000 |
| H | -4.25154800 | -0.94098500 | -0.25552500 |
| H | -4.00233100 | -2.59538000 | -0.82298600 |
| H | -3.63968300 | -2.18257900 | 0.84815500  |

0 imaginary frequency

E = -698.03563123

H = -697.671794

G = -697.728974

### **CHOCH3S<sup>-</sup>Na<sup>+</sup>**

(M06-2X /6-311+G(d,p)/CPCM (water))

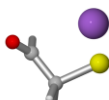

|    |             |             |             |
|----|-------------|-------------|-------------|
| C  | -0.97597300 | -0.80657600 | 0.55029200  |
| C  | -1.51843700 | 0.27349700  | -0.32129200 |
| O  | -1.57229000 | 1.44600400  | -0.01411400 |
| H  | -0.88316600 | -0.44895600 | 1.57555400  |
| H  | -1.62571200 | -1.68258200 | 0.51365700  |
| H  | -1.82887000 | -0.05003700 | -1.33219500 |
| S  | 0.66515800  | -1.21873600 | -0.18786300 |
| Na | 1.93090900  | 1.21016300  | 0.08979200  |

0 imaginary frequency

E = -713.75469835

H = -713.698854

G = -713.738640

### **TS-M1**

(M06-2X /6-311+G(d,p)/CPCM (water))

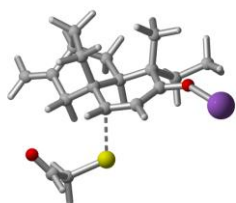

|   |             |             |             |
|---|-------------|-------------|-------------|
| C | 2.70294900  | 1.10879400  | -1.28159900 |
| C | 1.92842200  | 0.85729100  | 0.04454900  |
| C | 2.08798200  | -0.61518300 | 0.46086300  |
| C | 0.96583100  | -1.39983200 | 0.80704400  |
| C | -0.35480700 | -0.95621200 | 0.73211700  |
| C | 0.44161700  | 1.18737000  | -0.27800400 |
| C | -0.61812900 | 0.52217400  | 0.62134900  |
| C | -1.02804000 | 3.09804300  | 0.55881000  |
| C | -2.27215200 | 2.33970500  | 0.17482500  |
| C | -1.99692900 | 0.85710300  | 0.01960000  |
| C | 2.55637600  | 1.68869000  | 1.17862900  |
| C | -0.65127500 | 2.66042300  | 1.98564300  |
| C | -0.62855100 | 1.11528500  | 2.05643200  |
| C | 0.11581700  | 2.70575000  | -0.39707400 |
| C | -3.46970000 | 2.89779900  | 0.01099100  |
| C | -2.94866500 | -2.09668800 | -1.38039500 |
| H | -1.11018000 | -1.51194000 | 1.28129600  |
| S | -1.11403900 | -1.96987700 | -1.28889500 |
| C | -3.34135400 | -2.73657300 | -0.09015500 |
| O | -3.85001700 | -2.15032600 | 0.84075200  |
| H | 2.30079900  | 2.03234300  | -1.71441900 |
| H | 2.43403100  | 0.30665200  | -1.97879500 |
| H | 1.16970900  | -2.42288800 | 1.10827100  |
| H | 0.27006800  | 0.73147500  | -1.26044700 |
| H | -1.20351000 | 4.17551100  | 0.52106500  |
| H | -1.98758300 | 0.59690200  | -1.04294800 |
| H | -2.77749300 | 0.25460100  | 0.49625000  |
| H | 1.99926100  | 1.59602300  | 2.11057200  |
| H | 2.62167200  | 2.74743200  | 0.91948000  |
| H | 3.56987500  | 1.32902700  | 1.35952600  |
| H | -1.36966900 | 3.06510200  | 2.70181000  |
| H | 0.32862300  | 3.07702500  | 2.23490800  |
| H | 0.22210100  | 0.75281600  | 2.63350600  |
| H | -1.52840300 | 0.74613500  | 2.55970000  |
| H | -0.17254600 | 2.95139800  | -1.42262700 |
| H | 0.98860700  | 3.31846900  | -0.16325500 |
| H | -4.34266300 | 2.29995100  | -0.23375800 |

|    |             |             |             |
|----|-------------|-------------|-------------|
| H  | -3.60989700 | 3.96918500  | 0.11344800  |
| H  | -3.42388100 | -1.12165000 | -1.48786300 |
| H  | -3.21275300 | -2.74466900 | -2.21855200 |
| H  | -3.07396900 | -3.80530600 | 0.00381800  |
| C  | 4.22422700  | 1.23851000  | -1.21609100 |
| H  | 4.67907500  | 0.34925200  | -0.78229500 |
| H  | 4.62344500  | 1.37998700  | -2.22365600 |
| H  | 4.52538300  | 2.10443000  | -0.62215700 |
| O  | 3.25717100  | -1.07012000 | 0.53914000  |
| Na | 4.34252100  | -2.97436100 | 0.85618400  |

1 imaginary frequency (-207.53)

E = -1411.77671341

H = -1411.356520

G = -1411.432306

### TS-M2

(M06-2X /6-311+G(d,p)/CPCM (water))

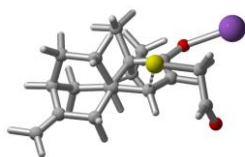

|   |             |             |             |
|---|-------------|-------------|-------------|
| C | 0.83278200  | 3.04130700  | 1.03036900  |
| C | 0.51871300  | 1.87046000  | 0.04976200  |
| C | -0.98897600 | 1.57393500  | 0.13282100  |
| C | -1.43133900 | 0.28352500  | 0.49469900  |
| C | -0.63936200 | -0.86980800 | 0.45214100  |
| C | 1.32209300  | 0.65530600  | 0.59056300  |
| C | 0.84047700  | -0.74273800 | 0.11464200  |
| C | 3.41590200  | -0.48157800 | -0.29856400 |
| C | 3.11315400  | -1.70283800 | 0.53410000  |
| C | 1.64547900  | -1.78435200 | 0.91760400  |
| C | 0.84599400  | 2.30258600  | -1.38804400 |
| C | 2.67095800  | -0.60796700 | -1.63869500 |
| C | 1.19948100  | -0.99055300 | -1.36859900 |
| C | 2.86527200  | 0.76063600  | 0.42016200  |
| C | 4.02215400  | -2.61165600 | 0.88084400  |
| C | -3.22832900 | -2.23539400 | -0.59607800 |
| H | -0.88092300 | -1.65743700 | 1.15817700  |
| S | -1.50310100 | -2.34677300 | -1.19015500 |

|    |             |             |             |
|----|-------------|-------------|-------------|
| C  | -3.26694300 | -2.93337500 | 0.72377200  |
| O  | -3.37607200 | -2.37332700 | 1.79239400  |
| H  | 1.90423400  | 2.99517500  | 1.25490600  |
| H  | 0.31692100  | 2.82981100  | 1.97399700  |
| H  | -2.46776100 | 0.19974300  | 0.80664900  |
| H  | 1.11441500  | 0.65929000  | 1.66688700  |
| H  | 4.49196400  | -0.38537600 | -0.45986000 |
| H  | 1.52645500  | -1.59126100 | 1.99038700  |
| H  | 1.25089200  | -2.78681000 | 0.72027800  |
| H  | 0.69833100  | 1.49940100  | -2.10829100 |
| H  | 1.87362300  | 2.66237200  | -1.47825200 |
| H  | 0.18387900  | 3.12341800  | -1.66753400 |
| H  | 3.14773900  | -1.36206300 | -2.26874800 |
| H  | 2.73852600  | 0.34823800  | -2.16597100 |
| H  | 0.51067600  | -0.46866600 | -2.03082300 |
| H  | 1.06477800  | -2.05766700 | -1.56399800 |
| H  | 3.34553800  | 0.86410400  | 1.39660800  |
| H  | 3.13855400  | 1.64494400  | -0.16032100 |
| H  | 3.75286400  | -3.48722900 | 1.46395100  |
| H  | 5.06266500  | -2.50352400 | 0.59229500  |
| H  | -3.54061300 | -1.19493800 | -0.49229100 |
| H  | -3.87207200 | -2.74835100 | -1.31269400 |
| H  | -3.12366700 | -4.02892900 | 0.68034300  |
| C  | 0.50616800  | 4.46461100  | 0.57943700  |
| H  | -0.54735500 | 4.56610700  | 0.32338100  |
| H  | 0.73951800  | 5.16555600  | 1.38493600  |
| H  | 1.10268600  | 4.75555300  | -0.28809800 |
| O  | -1.78354900 | 2.53567200  | -0.03015100 |
| Na | -3.96975900 | 2.65959100  | -0.38700000 |

1 imaginary frequency (-242.46)

E = -1411.77058161

H = -1411.350524

G = -1411.426028

### TS-M1 intermediate

(M06-2X /6-311+G(d,p)/CPCM (water))

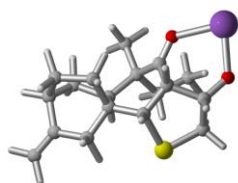

|   |             |             |             |
|---|-------------|-------------|-------------|
| C | 2.58514900  | 0.93389700  | -1.60461600 |
| C | 1.81620600  | 0.70620200  | -0.26973600 |
| C | 1.96591500  | -0.76150400 | 0.17835200  |
| C | 0.86745200  | -1.52735800 | 0.47565500  |
| C | -0.55355100 | -1.12359800 | 0.30797000  |
| C | 0.33178200  | 1.05681800  | -0.60147900 |
| C | -0.74465000 | 0.39715400  | 0.28524000  |
| C | -1.06707400 | 2.99141800  | 0.30288300  |
| C | -2.34178800 | 2.29337600  | -0.08599800 |
| C | -2.12269100 | 0.80518100  | -0.27456200 |
| C | 2.46160000  | 1.55634400  | 0.84028400  |
| C | -0.68635700 | 2.49357500  | 1.70957800  |
| C | -0.69988600 | 0.94507500  | 1.72877000  |
| C | 0.03379000  | 2.58360100  | -0.69562200 |
| C | -3.51993200 | 2.89741400  | -0.22545600 |
| C | -2.92516500 | -2.23103800 | -1.15344100 |
| H | -1.18682500 | -1.54670900 | 1.09559800  |
| S | -1.10602700 | -2.01797400 | -1.26154700 |
| C | -3.25067300 | -2.87154900 | 0.16037600  |
| O | -3.86568900 | -2.32403600 | 1.04410800  |
| H | 2.18593100  | 1.85043200  | -2.05673800 |
| H | 2.31142800  | 0.11758500  | -2.28377600 |
| H | 1.05023300  | -2.55212500 | 0.79057900  |
| H | 0.16497000  | 0.62648700  | -1.59675700 |
| H | -1.20338800 | 4.07539600  | 0.30247100  |
| H | -2.16912300 | 0.56263700  | -1.34192200 |
| H | -2.91410500 | 0.24041800  | 0.23002100  |
| H | 1.91775900  | 1.47547900  | 1.78111800  |
| H | 2.53563600  | 2.61288600  | 0.57270900  |
| H | 3.47273900  | 1.18655100  | 1.01041300  |
| H | -1.39153400 | 2.89082300  | 2.44322500  |
| H | 0.30153600  | 2.88451100  | 1.96627700  |
| H | 0.15899900  | 0.54136500  | 2.26557500  |
| H | -1.59444800 | 0.58486600  | 2.24913700  |
| H | -0.28986900 | 2.84674800  | -1.70652600 |
| H | 0.92887500  | 3.17367500  | -0.49284500 |
| H | -4.41575200 | 2.33827100  | -0.47864500 |
| H | -3.62068400 | 3.96978900  | -0.09144200 |
| H | -3.47573800 | -1.30255000 | -1.28601400 |
| H | -3.16297600 | -2.92762500 | -1.96111700 |
| H | -2.84663300 | -3.89055900 | 0.30159100  |
| C | 4.10754400  | 1.05968500  | -1.55000700 |
| H | 4.55336700  | 0.18162200  | -1.08561700 |
| H | 4.50608300  | 1.16843000  | -2.56239400 |

|    |            |             |             |
|----|------------|-------------|-------------|
| H  | 4.41396800 | 1.94245800  | -0.98355700 |
| O  | 3.17703000 | -1.19413100 | 0.29861200  |
| Na | 4.13452100 | -2.94133600 | 1.18539400  |

0 imaginary frequency

E = -1411.78601054

H = -1411.364883

G = -1411.440361

### TS-A1

(M06-2X /6-311+G(d,p)/CPCM (water))

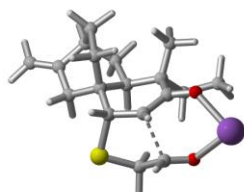

|   |             |             |             |
|---|-------------|-------------|-------------|
| C | -0.67932100 | 2.04296600  | -0.49418100 |
| C | -0.37345400 | 1.06248800  | -1.66504600 |
| C | -1.55488200 | 0.08940800  | -1.84669300 |
| C | -1.41719600 | -1.29568300 | -1.64063200 |
| O | -2.67059900 | 0.59065200  | -2.14182700 |
| C | -0.10377500 | -1.98059100 | -1.44865000 |
| C | 0.93610300  | 0.31705400  | -1.24706800 |
| C | 1.10817100  | -1.10708300 | -1.81087700 |
| C | 3.17679400  | 0.35002400  | -2.47133000 |
| C | 3.60886100  | -0.93086300 | -1.81033600 |
| C | 2.42322700  | -1.67960500 | -1.23913900 |
| C | -0.29504600 | 1.85820800  | -2.98208200 |
| C | 2.38333600  | -0.04658200 | -3.73083100 |
| C | 1.28598700  | -1.07052400 | -3.34493500 |
| C | 2.25111700  | 1.11382100  | -1.50225200 |
| C | 4.86692100  | -1.36286800 | -1.75513500 |
| S | -0.03289700 | -2.68632900 | 0.30423600  |
| C | -1.14933300 | -1.50779500 | 1.08727100  |
| C | -2.43658600 | -1.36443200 | 0.29981600  |
| O | -3.20675500 | -0.40061300 | 0.49095400  |
| H | -0.05623600 | -2.89173400 | -2.05138400 |
| H | -2.21868500 | -1.89027200 | -2.06525100 |
| H | 0.27635000  | 2.49324500  | -0.19835100 |
| H | -1.01525300 | 1.44639200  | 0.36048700  |

|    |             |             |             |
|----|-------------|-------------|-------------|
| H  | 0.85067800  | 0.17900500  | -0.16233800 |
| H  | 4.04189700  | 0.96127000  | -2.73850200 |
| H  | 2.41964800  | -1.57429800 | -0.15078000 |
| H  | 2.49699100  | -2.75102300 | -1.45695200 |
| H  | -0.05487400 | 1.22272700  | -3.83380600 |
| H  | 0.43702400  | 2.66615700  | -2.93390900 |
| H  | -1.27050200 | 2.30318400  | -3.17349000 |
| H  | 3.06216300  | -0.47540500 | -4.47119100 |
| H  | 1.95034500  | 0.85364000  | -4.17190900 |
| H  | 0.33794300  | -0.84657600 | -3.83806700 |
| H  | 1.57856900  | -2.07428600 | -3.67116600 |
| H  | 2.78201600  | 1.27336600  | -0.55989000 |
| H  | 2.04529100  | 2.10295700  | -1.91260400 |
| H  | 5.11859800  | -2.31479900 | -1.29754200 |
| H  | 5.68116700  | -0.77390700 | -2.16505800 |
| H  | -0.68722500 | -0.53356200 | 1.24725100  |
| H  | -1.39976300 | -1.93645600 | 2.06388500  |
| H  | -2.85286200 | -2.33477500 | -0.01413000 |
| C  | -1.68404500 | 3.16767200  | -0.73890500 |
| H  | -2.64513600 | 2.77564800  | -1.07007500 |
| H  | -1.83654200 | 3.72901300  | 0.18641200  |
| H  | -1.32398900 | 3.87146700  | -1.49259900 |
| Na | -4.61486900 | 0.41640400  | -1.06629100 |

1 imaginary frequency (-170.74)

E = -1411.792804

H = -1411.371935

G = -1411.440230

### TS-A2

(M06-2X /6-311+G(d,p)/CPCM (water))

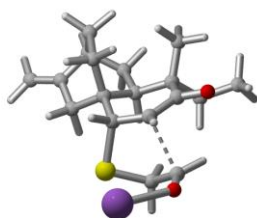

|   |             |            |             |
|---|-------------|------------|-------------|
| C | -0.30264600 | 2.74072600 | -0.88132800 |
| C | -0.46612000 | 1.72085300 | 0.28349500  |
| C | 0.91044700  | 1.44064800 | 0.93334800  |
| C | 1.43872600  | 0.14372600 | 0.96743900  |

|    |             |             |             |
|----|-------------|-------------|-------------|
| O  | 1.53127300  | 2.43041200  | 1.41061500  |
| C  | 0.73411900  | -1.08168200 | 0.52296300  |
| C  | -1.07862200 | 0.44280900  | -0.37436600 |
| C  | -0.77805200 | -0.89578300 | 0.33098200  |
| C  | -3.36492800 | -0.60056300 | 0.08268600  |
| C  | -2.91673400 | -1.92795500 | -0.46780300 |
| C  | -1.40593600 | -2.02126500 | -0.51850600 |
| C  | -1.31705000 | 2.36236300  | 1.39654600  |
| C  | -2.97026500 | -0.57717200 | 1.57073000  |
| C  | -1.47705700 | -0.96201800 | 1.70915400  |
| C  | -2.60959200 | 0.52004300  | -0.65942700 |
| C  | -3.74123800 | -2.90450200 | -0.84082100 |
| S  | 1.62107500  | -1.79795500 | -1.01483500 |
| C  | 2.22870400  | -0.23611900 | -1.69809600 |
| C  | 3.09061400  | 0.51032300  | -0.70409400 |
| H  | 0.88800900  | -1.90358500 | 1.22888300  |
| H  | 2.32249900  | 0.01312600  | 1.58070000  |
| H  | -1.21567900 | 2.68617800  | -1.48765300 |
| H  | 0.50853000  | 2.38610300  | -1.52838500 |
| H  | -0.58237700 | 0.35963600  | -1.34820300 |
| H  | -4.44436100 | -0.47648900 | -0.03191300 |
| H  | -1.07064100 | -1.92492800 | -1.55497600 |
| H  | -1.06484800 | -2.99996900 | -0.16264200 |
| H  | -1.49172600 | 1.67677100  | 2.22592500  |
| H  | -2.28208800 | 2.71837700  | 1.02991100  |
| H  | -0.77371500 | 3.21954300  | 1.79237200  |
| H  | -3.59821500 | -1.27425300 | 2.12987200  |
| H  | -3.16077100 | 0.42186400  | 1.96903600  |
| H  | -0.96362200 | -0.32481100 | 2.43123700  |
| H  | -1.38726400 | -1.98938500 | 2.07846200  |
| H  | -2.79737200 | 0.42186500  | -1.73219700 |
| H  | -3.02243000 | 1.48454400  | -0.36111000 |
| H  | -3.36430700 | -3.85838900 | -1.19743400 |
| H  | -4.81812500 | -2.77521500 | -0.80117400 |
| H  | 1.40619600  | 0.38685400  | -2.04516500 |
| H  | 2.85300100  | -0.50891700 | -2.55495700 |
| H  | 2.92843900  | 1.59568700  | -0.62601300 |
| C  | -0.04909500 | 4.20601400  | -0.52836300 |
| H  | 0.83230000  | 4.30804100  | 0.10353700  |
| H  | 0.10277900  | 4.78265700  | -1.44459200 |
| H  | -0.90116000 | 4.64459600  | -0.00416800 |
| O  | 4.12963200  | 0.01162900  | -0.26207000 |
| Na | 4.31058600  | -2.22511900 | 0.17771100  |



1 imaginary frequency (-117.35)

E = -1411.780275

H = -1411.360451

G = -1411.431250

### TS-A3

(M06-2X /6-311+G(d,p)/CPCM (water))

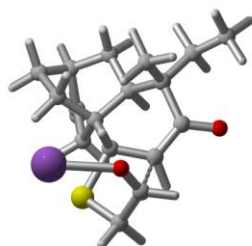

|   |             |             |             |
|---|-------------|-------------|-------------|
| C | -0.99662800 | 3.19291200  | -0.62070300 |
| C | -0.31718000 | 1.87499300  | -0.19129100 |
| C | 0.70491000  | 1.41562300  | -1.27539800 |
| C | 1.11668700  | 0.06764700  | -1.21938800 |
| O | 1.03344000  | 2.20454300  | -2.19465400 |
| C | 0.58151400  | -0.80598500 | -0.13227800 |
| C | -1.40235800 | 0.75238700  | -0.20901900 |
| C | -0.92290300 | -0.68669100 | 0.16438800  |
| C | -3.42587100 | -0.32978900 | 0.80708000  |
| C | -3.27500800 | -1.18876500 | -0.42816500 |
| C | -1.83491700 | -1.63260100 | -0.63782400 |
| C | 0.36210700  | 2.08640100  | 1.17076500  |
| C | -2.68885500 | -1.03448200 | 1.95765400  |
| C | -1.17511700 | -0.97128800 | 1.66309400  |
| C | -2.71589300 | 1.02144300  | 0.55584900  |
| C | -4.27823000 | -1.50768600 | -1.24272600 |
| S | 1.16891000  | -2.53407400 | -0.40322500 |
| C | 2.82592500  | -2.06100200 | -1.05022600 |
| C | 3.26702400  | -0.73517100 | -0.46382100 |
| H | 1.07696000  | -0.52571400 | 0.80306300  |
| H | 1.41614100  | -0.36038300 | -2.16868600 |
| H | -1.87846000 | 3.34157200  | 0.01019600  |
| H | -1.35976600 | 3.06949000  | -1.64553500 |
| H | -1.68126100 | 0.69078200  | -1.27009000 |
| H | -4.48101700 | -0.17784800 | 1.04328500  |
| H | -1.57466900 | -1.62138400 | -1.70068300 |
| H | -1.71183900 | -2.66190600 | -0.27778900 |
| H | 0.86692200  | 1.19869800  | 1.54750200  |

|    |             |             |             |
|----|-------------|-------------|-------------|
| H  | -0.36897000 | 2.40411000  | 1.92199700  |
| H  | 1.11568200  | 2.87278200  | 1.09045700  |
| H  | -3.03262400 | -2.06938000 | 2.03856600  |
| H  | -2.91864500 | -0.53947300 | 2.90433400  |
| H  | -0.70622200 | -0.18569900 | 2.26022800  |
| H  | -0.68389300 | -1.91183000 | 1.93415600  |
| H  | -3.36175300 | 1.68283400  | -0.02473000 |
| H  | -2.52570800 | 1.50818700  | 1.52010600  |
| H  | -4.11356200 | -2.10645500 | -2.13335500 |
| H  | -5.29315400 | -1.18077400 | -1.04004700 |
| H  | 2.81301100  | -2.02615600 | -2.13732400 |
| H  | 3.52474600  | -2.83655800 | -0.72627300 |
| H  | 3.74554500  | -0.02398400 | -1.14650900 |
| C  | -0.14313900 | 4.46060900  | -0.53332700 |
| H  | 0.81594200  | 4.32296900  | -1.03142000 |
| H  | -0.66305200 | 5.29379400  | -1.01325800 |
| H  | 0.04006900  | 4.74896800  | 0.50433100  |
| O  | 3.35592400  | -0.59955800 | 0.76066200  |
| Na | 2.67287500  | -2.16749100 | 2.30207400  |

1 imaginary frequency (-180.82)

E = -1411.762463

H = -1411.342829

G = -1411.413309

### TS-A4

(M06-2X /6-311+G(d,p)/CPCM (water))

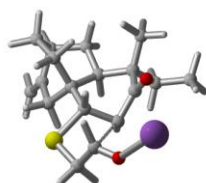

|   |             |             |             |
|---|-------------|-------------|-------------|
| C | 0.06706500  | 2.97856300  | 1.12313600  |
| C | 0.26649000  | 2.02746200  | -0.08130300 |
| C | -1.04979000 | 1.27093400  | -0.35660000 |
| C | -1.32656500 | 0.13390200  | 0.53016100  |
| O | -1.67600600 | 1.50761700  | -1.39344600 |
| C | -0.45141900 | -0.89454200 | -0.16459500 |
| C | 1.32293600  | 0.93908000  | 0.35085000  |
| C | 1.08129500  | -0.56399400 | -0.06173900 |

|    |             |             |             |
|----|-------------|-------------|-------------|
| C  | 3.64509700  | 0.01743000  | 0.01196700  |
| C  | 3.23017700  | -0.82167000 | 1.19233700  |
| C  | 1.82702100  | -1.37522400 | 1.02019900  |
| C  | 0.67591100  | 2.83911800  | -1.31183400 |
| C  | 3.30856900  | -0.76334700 | -1.27178400 |
| C  | 1.77075900  | -0.85449200 | -1.41046500 |
| C  | 2.78634000  | 1.29924000  | 0.00549100  |
| C  | 3.99033400  | -1.03863100 | 2.26373500  |
| S  | -0.75793900 | -2.67466100 | 0.35626200  |
| C  | -2.56800700 | -2.68148600 | 0.35849000  |
| C  | -3.17544000 | -2.10718000 | -0.88843600 |
| H  | -0.68938400 | -0.89992400 | -1.23180800 |
| H  | -0.85480200 | 0.31556800  | 1.50666200  |
| H  | 1.05018200  | 3.36934100  | 1.41270500  |
| H  | -0.29421200 | 2.38859300  | 1.97138600  |
| H  | 1.26653200  | 0.92318100  | 1.44467900  |
| H  | 4.70915100  | 0.25908300  | 0.05972300  |
| H  | 1.28387900  | -1.34922900 | 1.96928000  |
| H  | 1.89412000  | -2.42574900 | 0.71130700  |
| H  | 0.96041700  | 2.19111100  | -2.14412600 |
| H  | 1.51716500  | 3.49979300  | -1.08367400 |
| H  | -0.16044600 | 3.45043200  | -1.64880300 |
| H  | 3.75394900  | -1.76098100 | -1.22203200 |
| H  | 3.74550200  | -0.25572600 | -2.13540700 |
| H  | 1.40443800  | -0.13844500 | -2.15345100 |
| H  | 1.47290800  | -1.84887000 | -1.75846300 |
| H  | 3.17204400  | 2.03184200  | 0.72000600  |
| H  | 2.86436100  | 1.74229600  | -0.99054200 |
| H  | 3.63091600  | -1.62673000 | 3.10275500  |
| H  | 4.99599800  | -0.63573200 | 2.32992800  |
| H  | -2.97752200 | -2.16357200 | 1.22318000  |
| H  | -2.86059100 | -3.73715200 | 0.40218000  |
| H  | -2.55368500 | -2.13711900 | -1.79982700 |
| C  | -0.89275400 | 4.14004700  | 0.87181700  |
| H  | -1.85597600 | 3.78022000  | 0.49867300  |
| H  | -1.07639000 | 4.68955300  | 1.79753500  |
| H  | -0.49303700 | 4.84661900  | 0.14178500  |
| O  | -4.30968500 | -1.68524700 | -0.93477100 |
| Na | -5.51469600 | -0.63055700 | -2.62785700 |

1 imaginary frequency (-73.99)

E = -1411.717456

H = -1411.298278

G = -1411.372523

**TS-A1 intermediate**

(M06-2X /6-311+G(d,p)/CPCM (water))

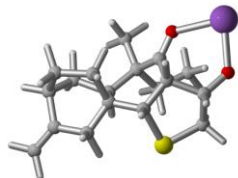

|   |             |             |             |
|---|-------------|-------------|-------------|
| C | 0.87751500  | -0.84963700 | 2.09586400  |
| C | 0.27498600  | -1.26326300 | 0.71593500  |
| C | 1.24490400  | -0.79738000 | -0.37961300 |
| C | 1.20524100  | 0.58902100  | -0.96815500 |
| O | 2.08453700  | -1.57733400 | -0.80361900 |
| C | -0.06919500 | 1.36518900  | -0.67939400 |
| C | -1.15017700 | -0.58879600 | 0.60707900  |
| C | -1.29853500 | 0.47365900  | -0.51313400 |
| C | -3.47666900 | -0.96077400 | -0.35828500 |
| C | -3.71492800 | 0.44098700  | 0.13069500  |
| C | -2.53569100 | 1.33526700  | -0.18789700 |
| C | 0.23243100  | -2.79753900 | 0.67007900  |
| C | -2.99128000 | -0.88546200 | -1.81754700 |
| C | -1.57322200 | -0.26722400 | -1.84349200 |
| C | -2.33782300 | -1.58532000 | 0.47008100  |
| C | -4.80557000 | 0.84009400  | 0.78063900  |
| S | 0.27907100  | 2.46058100  | 0.79065100  |
| C | 2.06763100  | 2.11154800  | 0.81206400  |
| C | 2.44507700  | 1.50633200  | -0.56002300 |
| O | 3.65679200  | 0.92975500  | -0.58327600 |
| H | -0.26510700 | 2.04913100  | -1.50908500 |
| H | 1.30944600  | 0.43114500  | -2.04589300 |
| H | 0.23701800  | -1.32070600 | 2.85015700  |
| H | 0.74993800  | 0.22578100  | 2.22198800  |
| H | -1.29962800 | -0.04838700 | 1.54735300  |
| H | -4.38402400 | -1.56276300 | -0.27609000 |
| H | -2.33302500 | 2.00599900  | 0.65174400  |
| H | -2.76481000 | 1.96197300  | -1.05956500 |
| H | -0.08275800 | -3.16668300 | -0.30780100 |
| H | -0.45695300 | -3.17651700 | 1.42698600  |
| H | 1.22075600  | -3.20913300 | 0.86376400  |
| H | -3.68613500 | -0.28135400 | -2.40684800 |
| H | -2.97948800 | -1.88699000 | -2.25374200 |

|    |             |             |             |
|----|-------------|-------------|-------------|
| H  | -0.82236300 | -1.05256000 | -1.98427200 |
| H  | -1.46706200 | 0.42449000  | -2.68432100 |
| H  | -2.69628600 | -1.87738200 | 1.45995500  |
| H  | -2.03831400 | -2.49832200 | -0.04564800 |
| H  | -4.90883200 | 1.85919800  | 1.14016000  |
| H  | -5.62739200 | 0.15678500  | 0.96885500  |
| H  | 2.31897100  | 1.41077900  | 1.60962000  |
| H  | 2.60728000  | 3.04423800  | 0.97828000  |
| H  | 2.34108200  | 2.34457900  | -1.28498500 |
| C  | 2.33570800  | -1.23154800 | 2.34515800  |
| H  | 2.99955700  | -0.78693100 | 1.59907900  |
| H  | 2.64528500  | -0.86955600 | 3.32847000  |
| H  | 2.48801100  | -2.31226300 | 2.33147900  |
| Na | 4.19242100  | -0.96946700 | -1.50865600 |

0 imaginary frequency

E = -1411.80783161

H = -1411.384670

G = -1411.453313

### Product

(M06-2X /6-311+G(d,p)/CPCM (water))

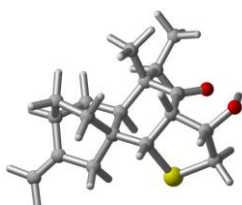

|   |             |             |             |
|---|-------------|-------------|-------------|
| C | 0.58906800  | 2.60675800  | -1.19163400 |
| C | 0.38809500  | 1.56330100  | -0.07055700 |
| C | 1.63500000  | 0.69171800  | 0.05171500  |
| C | 1.53563400  | -0.57170300 | 0.90421100  |
| O | 2.67880400  | 0.97861500  | -0.50012900 |
| C | 0.36076600  | -1.43626900 | 0.43668200  |
| C | -0.79388200 | 0.63901400  | -0.49517000 |
| C | -0.96197200 | -0.68641900 | 0.29117200  |
| C | -3.24948200 | 0.56607600  | 0.17356900  |
| C | -3.35020900 | -0.81564800 | -0.42518200 |
| C | -2.00136700 | -1.51459600 | -0.49494300 |
| C | 0.19293900  | 2.27005500  | 1.28648000  |
| C | -2.80136400 | 0.42920000  | 1.63953600  |
| C | -1.57792300 | -0.50747500 | 1.70103000  |

|   |             |             |             |
|---|-------------|-------------|-------------|
| C | -2.16845800 | 1.36371600  | -0.57511900 |
| C | -4.48927300 | -1.37009000 | -0.83210900 |
| S | 0.97730300  | -2.19205800 | -1.14287500 |
| C | 2.74154900  | -2.04869100 | -0.66811500 |
| C | 2.76750900  | -1.47605000 | 0.75958300  |
| H | 0.21886100  | -2.25553900 | 1.14702100  |
| H | 1.40120800  | -0.27758900 | 1.95059500  |
| H | -0.39700500 | 2.99108200  | -1.46825300 |
| H | 0.97579200  | 2.08207700  | -2.07032000 |
| H | -0.52963900 | 0.32604600  | -1.51203900 |
| H | -4.20996600 | 1.08143000  | 0.10976500  |
| H | -1.68929200 | -1.61109200 | -1.54085000 |
| H | -2.07103400 | -2.52498100 | -0.07859800 |
| H | -0.04444300 | 1.58334500  | 2.09544500  |
| H | -0.61208400 | 3.00404400  | 1.21570000  |
| H | 1.10112900  | 2.80871400  | 1.56482000  |
| H | -3.61467900 | 0.03607500  | 2.25246000  |
| H | -2.55158800 | 1.42264000  | 2.02433000  |
| H | -0.84811400 | -0.16294100 | 2.43373100  |
| H | -1.88796300 | -1.50267000 | 2.03513000  |
| H | -2.46151700 | 1.49706800  | -1.61892200 |
| H | -2.11375100 | 2.36143500  | -0.13285500 |
| H | -4.51578200 | -2.37752500 | -1.23578600 |
| H | -5.42848400 | -0.82994100 | -0.77324600 |
| H | 3.24037900  | -1.36838100 | -1.35725000 |
| H | 3.21869100  | -3.02575900 | -0.71310700 |
| H | 2.64986700  | -2.29837300 | 1.46918800  |
| C | 1.49587500  | 3.79482500  | -0.86747300 |
| H | 2.47518300  | 3.47016600  | -0.51457500 |
| H | 1.64411900  | 4.39845500  | -1.76549600 |
| H | 1.05337800  | 4.44336300  | -0.10863400 |
| O | 3.99702600  | -0.86445500 | 1.07989600  |
| H | 4.07821100  | -0.09783300 | 0.49754700  |

0 imaginary frequency

E = -1250.08009264

H = -1249.645732

G = -1249.710890

**H<sub>2</sub>O**

(M06-2X /6-311+G(d,p)/CPCM (water))

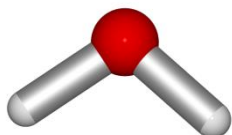

|   |            |             |             |
|---|------------|-------------|-------------|
| O | 0.00000000 | 0.00000000  | 0.11525900  |
| H | 0.00000000 | 0.76003000  | -0.47274100 |
| H | 0.00000000 | -0.76003000 | -0.47274100 |

0 imaginary frequency

E = -76.42894147

H = -76.403642

G = -76.425063

### NaOH

(M06-2X /6-311+G(d,p)/CPCM (water))

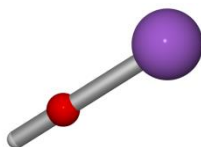

|    |             |             |            |
|----|-------------|-------------|------------|
| O  | 0.00001300  | 1.10525900  | 0.00000000 |
| H  | -0.00025400 | 2.06121300  | 0.00000000 |
| Na | 0.00001300  | -0.99120700 | 0.00000000 |

0 imaginary frequency

E = -238.15026851

H = -238.135271

G = -238.156133

**Table S1.** Summary of  $^1\text{H}$  NMR (500 MHz) and  $^{13}\text{C}$  NMR (101 MHz) data for compound **2a** in  $\text{CD}_3\text{OD}$  ( $\delta$  in ppm,  $J$  in Hz). Assignments are based on 1D and 2D NMR experiments.

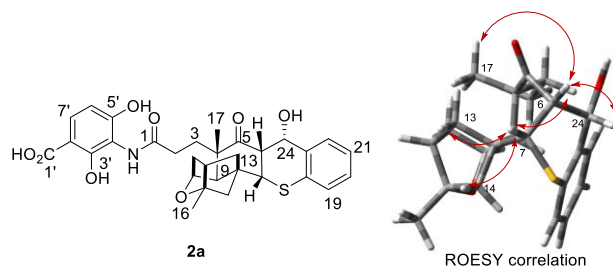

| No. | $\delta_{\text{C}}$ | $\delta_{\text{H}}$ ( $J$ in Hz)                                     |
|-----|---------------------|----------------------------------------------------------------------|
| 1   | 172.14              |                                                                      |
| 2   | 31.05               | 2.55 (m, 1H), 2.36 (m, 1H)                                           |
| 3   | 32.57               | 2.11 (dd, $J = 15.2, 5.0$ Hz, 1H), 1.86 (dd, $J = 17.5, 7.5$ Hz, 1H) |
| 4   | 48.86               |                                                                      |
| 5   | 211.20              |                                                                      |
| 6   | 48.48               | 3.57 (br, s, 1H)                                                     |
| 7   | 45.25               | 3.76 (d, $J = 2.6$ Hz, 1H)                                           |
| 8   | 48.48               |                                                                      |
| 9   | 45.07               | 2.69 (br, s, 1H)                                                     |
| 10  | 77.08               | 4.50 (br, s, 1H)                                                     |
| 11  | 40.39               | 2.25 (d, $J = 11.7$ Hz, 1H), 2.07 (m, 1H)                            |
| 12  | 44.71               | 2.47 (d, $J = 6.6$ Hz, 1H)                                           |
| 13  | 42.68               | 2.44 (m, 1H), 1.76 (dd, $J = 10.7, 7.2$ Hz, 1H)                      |
| 14  | 51.79               | 2.05 (d, $J = 7.9$ Hz, 1H), 1.64 (d, $J = 11.3$ Hz, 1H)              |
| 15  | 86.88               |                                                                      |
| 16  | 21.88               | 1.46 (s, 3H)                                                         |
| 17  | 26.02               | 1.32 (s, 3H)                                                         |
| 18  | 131.20              |                                                                      |
| 19  | 131.57              | 7.40 (d, $J = 8.1$ Hz, 1H)                                           |
| 20  | 127.55              | 7.16 – 7.11 (m, 1H)                                                  |
| 21  | 126.30              | 7.08(d, $J = 8.4$ Hz, 1H)                                            |
| 22  | 124.49              | 7.16 – 7.11 (m, 1H)                                                  |
| 23  | 132.92              |                                                                      |
| 24  | 66.05               | 5.06 (d, $J = 1.8$ Hz, 1H)                                           |
| 1'  | 174.76              |                                                                      |
| 2'  | 104.63              |                                                                      |
| 3'  | 157.97              |                                                                      |
| 4'  | 112.53              |                                                                      |
| 5'  | 154.67              |                                                                      |
| 6'  | 108.17              | 6.40(d, $J = 8.7$ Hz, 1H)                                            |
| 7'  | 129.05              | 7.65 (d, $J = 8.8$ Hz, 1H)                                           |



**Table S2.** Summary of  $^1\text{H}$  NMR (400 MHz) and  $^{13}\text{C}$  NMR (101 MHz) data for compounds **4a** in  $\text{CDCl}_3$  ( $\delta$  in ppm,  $J$  in Hz). Assignments are based on 1D and 2D NMR experiments.

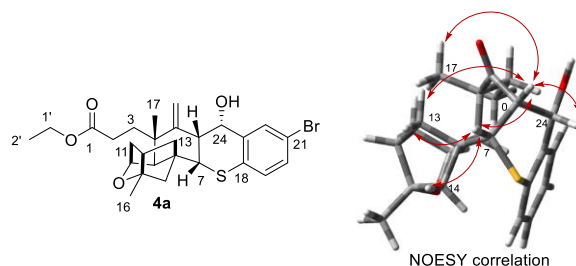

| No. | $\delta_C$ | $\delta_H$ ( $J$ in Hz)                                              |
|-----|------------|----------------------------------------------------------------------|
| 1   | 173.68     |                                                                      |
| 2   | 29.38      | 2.37 (dd, $J = 11.2, 5.2$ Hz, 1H); 2.17 (dd, $J = 11.0, 5.4$ Hz, 1H) |
| 3   | 31.64      | 2.03 (d, $J = 5.6$ Hz, 1H), 1.68 (m, 1H)                             |
| 4   | 46.87      |                                                                      |
| 5   | 210.01     |                                                                      |
| 6   | 47.49      | 3.46 (d, $J = 3.1$ Hz, 1H)                                           |
| 7   | 45.51      | 3.68 (d, $J = 3.2$ Hz, 1H)                                           |
| 8   | 48.83      |                                                                      |
| 9   | 44.99      | 2.57 (s, 1H)                                                         |
| 10  | 76.79      | 4.38 (s, 1H)                                                         |
| 11  | 40.83      | 2.13 (d, $J = 3.7$ Hz, 1H), 2.09 (d, $J = 5.6$ Hz, 1H)               |
| 12  | 44.44      | 2.45 (t, $J = 6.3$ Hz, 1H)                                           |
| 13  | 43.40      | 2.32 (dd, $J = 10.8, 4.7$ Hz, 1H), 1.73 (m, 1H)                      |
| 14  | 52.11      | 2.07 (d, $J = 2.5$ Hz, 1H), 1.56 (d, $J = 11.2$ Hz, 1H)              |
| 15  | 86.53      |                                                                      |
| 16  | 23.05      | 1.47 (s, 3H)                                                         |
| 17  | 26.76      | 1.27 (s, 3H)                                                         |
| 18  | 130.60     |                                                                      |
| 19  | 128.43     | 6.98 (d, $J = 8.5$ Hz, 1H)                                           |
| 20  | 131.33     | 7.29 (m, 1H)                                                         |
| 21  | 130.60     |                                                                      |
| 22  | 133.76     | 7.51 (d, $J = 2.1$ Hz, 1H)                                           |
| 23  | 134.51     |                                                                      |
| 24  | 66.52      | 5.04 (d, $J = 2.9$ Hz, 1H)                                           |
| 1'  | 60.37      | 4.07 (m, 2H)                                                         |
| 2'  | 14.22      | 1.21 (t, $J = 7.1$ Hz, 3H)                                           |

**Table S3.** Summary of  $^1\text{H}$  NMR (400 MHz) and  $^{13}\text{C}$  NMR (101 MHz) data for compounds **6a** in  $\text{CD}_3\text{OD}$  ( $\delta$  in ppm,  $J$  in Hz). Assignments are based on 1D and 2D NMR experiments.

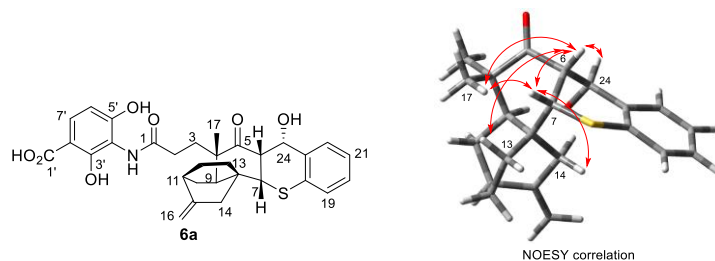

| No. | $\delta_C$ | $\delta_H$ ( $J$ in Hz)                                         |
|-----|------------|-----------------------------------------------------------------|
| 1   | 174.74     |                                                                 |
| 2   | 31.06      | 2.47 (dd, $J = 14.3, 5.2$ Hz, 1H), 2.35 (m, 1H)                 |
| 3   | 32.08      | 1.97 (m, 1H), 1.67 (m, 1H);                                     |
| 4   | 50.54      |                                                                 |
| 5   | 212.50     |                                                                 |
| 6   | 46.10      | 3.76 (dd, $J = 5.0, 3.1$ Hz, 1H)                                |
| 7   | 69.27      | 3.67 (d, $J = 2.3$ Hz, 1H)                                      |
| 8   | 36.53      |                                                                 |
| 9   | 38.55      | 2.58 (m, 1H)                                                    |
| 10  | 27.53      | 1.79 (d, $J = 7.4$ Hz, 1H), 1.73 (m, 1H);                       |
| 11  | 35.49      | 2.41 (dd, $J = 11.7, 5.6$ Hz, 1H)                               |
| 12  | 26.49      | 1.87 (s, 1H), 1.85 (s, 1H)                                      |
| 13  | 27.64      | 2.53 (d, $J = 12.1$ Hz, 1H), 1.49 (dd, $J = 21.9, 8.1$ Hz, 1H); |
| 14  | 42.51      | 2.67 (d, $J = 18.1$ Hz, 1H), 2.26 (m, 1H);                      |
| 15  | 149.66     |                                                                 |
| 16  | 105.67     | 4.90 (d, $J = 1.6$ Hz, 1H), 4.75 (d, $J = 1.6$ Hz, 1H)          |
| 17  | 21.86      | 1.32 (s, 3H)                                                    |
| 18  | 131.38     |                                                                 |
| 19  | 131.41     | 7.41 (m, 1H)                                                    |
| 20  | 124.44     | 7.13 (m, 1H)                                                    |
| 21  | 127.49     | 7.13 (m, 1H)                                                    |
| 22  | 126.34     | 7.13 (m, 1H)                                                    |
| 23  | 132.80     |                                                                 |
| 24  | 66.22      | 5.08 (d, $J = 2.5$ Hz, 1H)                                      |
| 1'  | missing    |                                                                 |
| 2'  | 105.67     |                                                                 |
| 3'  | 156.90     |                                                                 |
| 4'  | 112.41     |                                                                 |
| 5'  | 154.53     |                                                                 |
| 6'  | 106.67     | 6.30 (d, $J = 8.7$ Hz, 1H)                                      |
| 7'  | 128.67     | 7.61 (d, $J = 8.7$ Hz, 1H)                                      |

**Table S4.** Summary of  $^1\text{H}$  NMR (500 MHz) and  $^{13}\text{C}$  NMR (126 MHz) data for compounds **8a** in  $\text{CD}_3\text{OD}$  ( $\delta$  in ppm,  $J$  in Hz). Assignments are based on 1D and 2D NMR experiments.

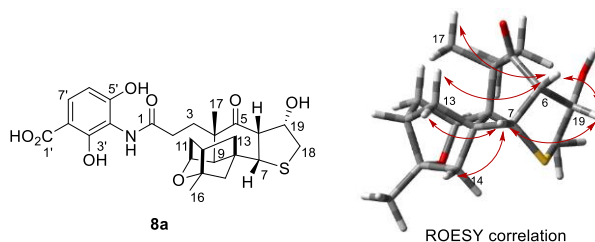

| No. | $\delta_C$ | $\delta_H$ ( $J$ in Hz)                                        |
|-----|------------|----------------------------------------------------------------|
| 1   | 173.68     |                                                                |
| 2   | 30.94      | 2.55 (m, 1H), 2.44 (d, $J = 6.6$ Hz, 1H)                       |
| 3   | 32.31      | 2.18 (m, 1H); 1.85 (m, 1H)                                     |
| 4   | 48.65      |                                                                |
| 5   | 211.77     |                                                                |
| 6   | 56.78      | 3.18 (d, $J = 4.1$ Hz, 1H)                                     |
| 7   | 55.52      | 3.80 (d, $J = 4.3$ Hz, 1H)                                     |
| 8   | 48.48      |                                                                |
| 9   | 43.18      | 2.64 (br, s, 1H),                                              |
| 10  | 76.89      | 4.50 (br, s, 1H),                                              |
| 11  | 40.25      | 2.23 (d, $J = 11.6$ Hz, 1H), 2.05 (m, 1H)                      |
| 12  | 45.19      | 2.46 (br, s, 1H)                                               |
| 13  | 44.33      | 2.31 (m, 1H), 1.74 (br, s, 1H)                                 |
| 14  | 55.00      | 1.77 (d, $J = 3.6$ Hz, 1H), 1.69 (d, $J = 11.2$ Hz, 1H)        |
| 15  | 86.82      |                                                                |
| 16  | 21.74      | 1.42 (s, 3H)                                                   |
| 17  | 25.13      | 1.31 (s, 3H)                                                   |
| 18  | 36.95      | 3.11 (dd, $J = 11.5, 4.8$ Hz, 1H), 2.75 (d, $J = 11.5$ Hz, 1H) |
| 19  | 73.82      | 5.03 (d, $J = 4.5$ Hz, 1H)                                     |
| 1'  | 174.73     |                                                                |
| 2'  | 107.63     |                                                                |
| 3'  | 157.52     |                                                                |
| 4'  | 112.51     |                                                                |
| 5'  | 156.77     |                                                                |
| 6'  | 107.63     | 6.41 (d, $J = 8.6$ Hz, 1H)                                     |
| 7'  | 129.08     | 7.67 (d, $J = 8.6$ Hz, 1H)                                     |

**Table S5.** Summary of  $^1\text{H}$  NMR (400 MHz) and  $^{13}\text{C}$  NMR (101 MHz) data for compounds **9a** in  $\text{CD}_3\text{OD}$  ( $\delta$  in ppm,  $J$  in Hz). Assignments are based on 1D and 2D NMR experiments.

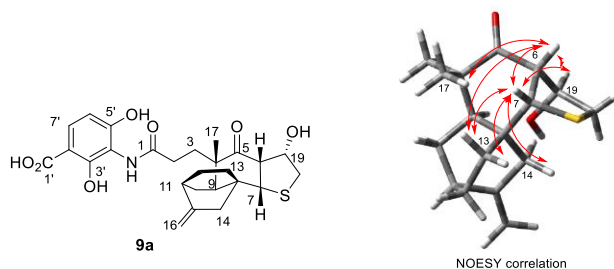

| No. | $\delta_C$ | $\delta_H$ ( $J$ in Hz)                                               |
|-----|------------|-----------------------------------------------------------------------|
| 1   | 175.08     |                                                                       |
| 2   | 31.04      | 2.51 (m, 1H), 2.43 (dt, $J = 9.6, 4.2$ Hz, 1H)                        |
| 3   | 31.73      | 2.04 (m, 1H), 1.57 (dd, $J = 21.7, 9.5$ Hz, 1H)                       |
| 4   | 50.37      |                                                                       |
| 5   | 213.06     |                                                                       |
| 6   | 55.66      | 3.30 (d, $J = 3.9$ Hz, 1H)                                            |
| 7   | 57.19      | 3.83 (d, $J = 4.4$ Hz, 1H)                                            |
| 8   | 34.19      |                                                                       |
| 9   | 36.76      | 2.51 (m, 1H)                                                          |
| 10  | 27.48      | 1.67 (m, 2H)                                                          |
| 11  | 35.75      | 2.38 (d, $J = 9.6$ Hz, 1H)                                            |
| 12  | 26.76      | 1.81 (d, $J = 1.3$ Hz, 1H), 1.78 (m, 1H)                              |
| 13  | 30.03      | 2.34(m. 1H), 1.49 (d, $J = 13.7$ Hz, 1H)                              |
| 14  | 45.96      | 2.29 (s, 2H)                                                          |
| 15  | 150.01     |                                                                       |
| 16  | 105.55     | 4.84 (m, 1H), 4.67 (d, $J = 1.5$ Hz, 1H)                              |
| 17  | 20.39      | 1.27 (s, 3H)                                                          |
| 18  | 36.69      | 3.11 (dd, $J = 11.5, 4.8$ Hz, 1H), 2.77 (dd, $J = 24.4, 11.1$ Hz, 1H) |
| 19  | 73.89      | 5.05 (d, $J = 4.2$ Hz, 1H)                                            |
| 1'  | 172.17     |                                                                       |
| 2'  | 104.73     |                                                                       |
| 3'  | 157.59     |                                                                       |
| 4'  | 112.72     |                                                                       |
| 5'  | 157.56     |                                                                       |
| 6'  | 108.49     | 6.35 (d, $J = 8.7$ Hz, 1H)                                            |
| 7'  | 129.08     | 7.63 (d, $J = 8.7$ Hz, 1H)                                            |

**Table S6.**  $^1\text{H}$  NMR spectroscopic data in  $\text{CDCl}_3$  ( $\delta$  in ppm,  $J$  in Hz) for MTPA-esters **5a** and **5b** and their corresponding  $\Delta\delta_{\text{S-R}}$ .

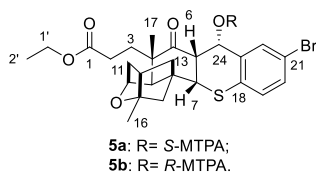

| Position | $\delta_{\text{H}}$ for <b>5a</b> ( <i>S</i> -MTPA) | $\delta_{\text{H}}$ for <b>5b</b> ( <i>R</i> -MTPA) | $\Delta\delta_{\text{S-R}}$ |
|----------|-----------------------------------------------------|-----------------------------------------------------|-----------------------------|
| 2a       | 2.3530                                              | 2.3899                                              | -0.0369                     |
| 2b       | 2.2241                                              | 2.1970                                              | +0.0271                     |
| 3a       | 2.0676                                              | 2.0733                                              | -0.0057                     |
| 3b       | 1.7480                                              | 1.7516                                              | -0.0036                     |
| 6        | 3.4227                                              | 3.5630                                              | -0.1403                     |
| 7        | 3.4014                                              | 3.5447                                              | -0.1433                     |
| 9        | 2.5487                                              | 2.5809                                              | -0.0322                     |
| 10       | 4.4035                                              | 4.4241                                              | -0.0206                     |
| 11a      | 2.1172                                              | 2.1427                                              | -0.0255                     |
| 11b      | 2.1086                                              | 2.1153                                              | -0.0067                     |
| 12       | 2.4159                                              | 2.4637                                              | -0.0478                     |
| 13a      | 2.1628                                              | 2.2565                                              | -0.0937                     |
| 13b      | 1.4361                                              | 1.6011                                              | -0.1650                     |
| 14a      | 2.0111                                              | 2.0340                                              | -0.0229                     |
| 14b      | 1.4652                                              | 1.5335                                              | -0.0683                     |
| 16       | 1.4499                                              | 1.4725                                              | -0.0226                     |
| 17       | 1.2924                                              | 1.3137                                              | -0.0213                     |
| 19       | 7.0010                                              | 6.9610                                              | +0.0400                     |
| 20       | 7.3304                                              | 7.4177                                              | -0.0873                     |
| 22       | 7.4100                                              | 7.4289                                              | -0.0189                     |
| 24       | 6.5549                                              | 6.5164                                              | +0.0385                     |
| 1'       | 4.0906                                              | 4.0921                                              | -0.0015                     |
| 2'       | 1.2268                                              | 1.2277                                              | -0.0009                     |

**Figure S1.** Structures of bioactive thiochromanes and tetra-hydrothiophenes (A).

Structures of adamantane derivatives (B).

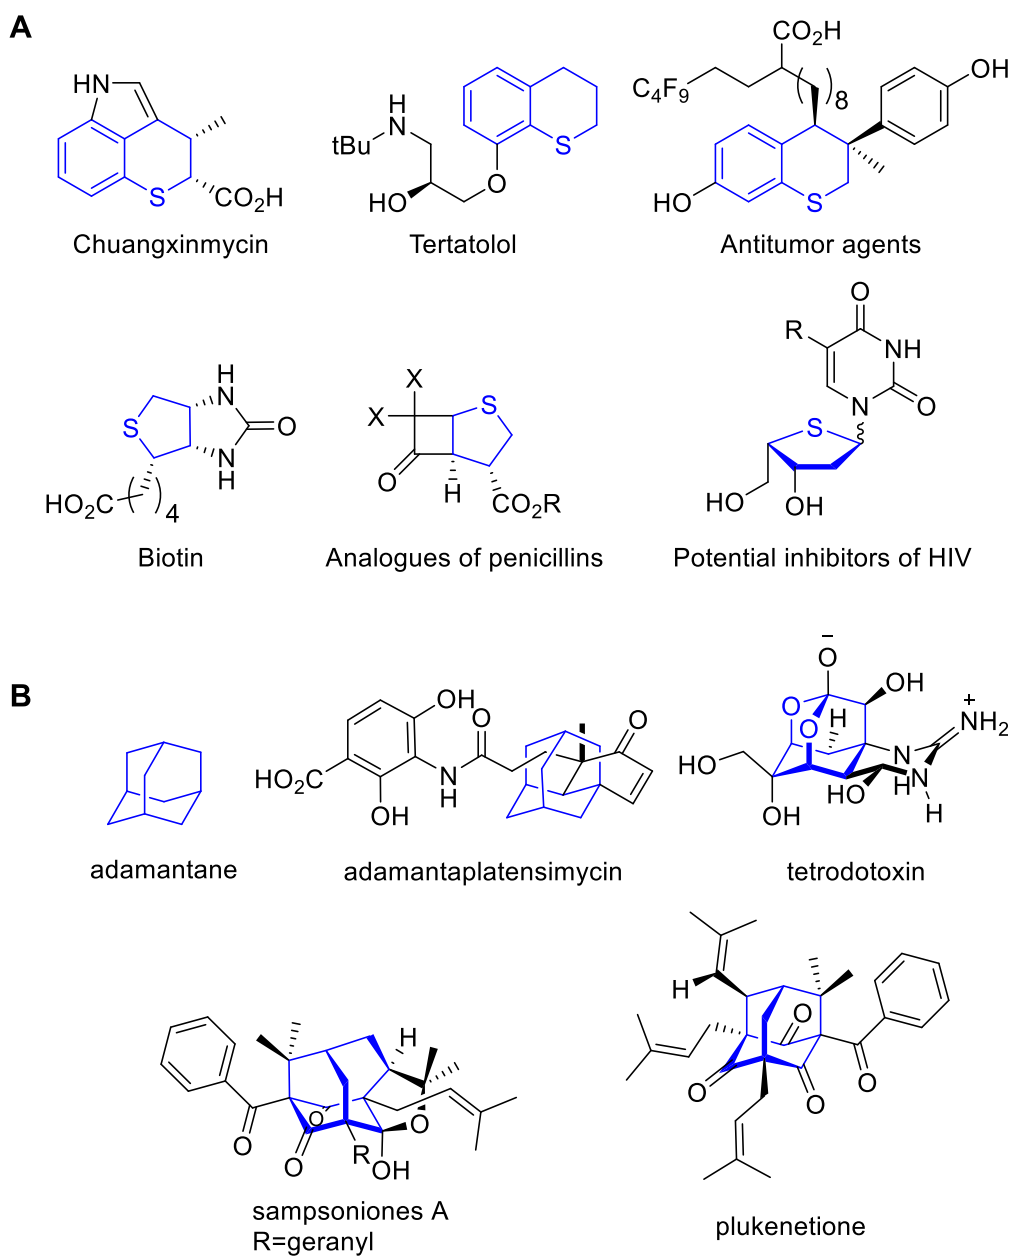

**Figure S2.**  $^1\text{H}$  NMR (500 MHz) and  $^{13}\text{C}$  NMR (101 MHz) spectrum of **2a** in  $\text{CD}_3\text{OD}$ .

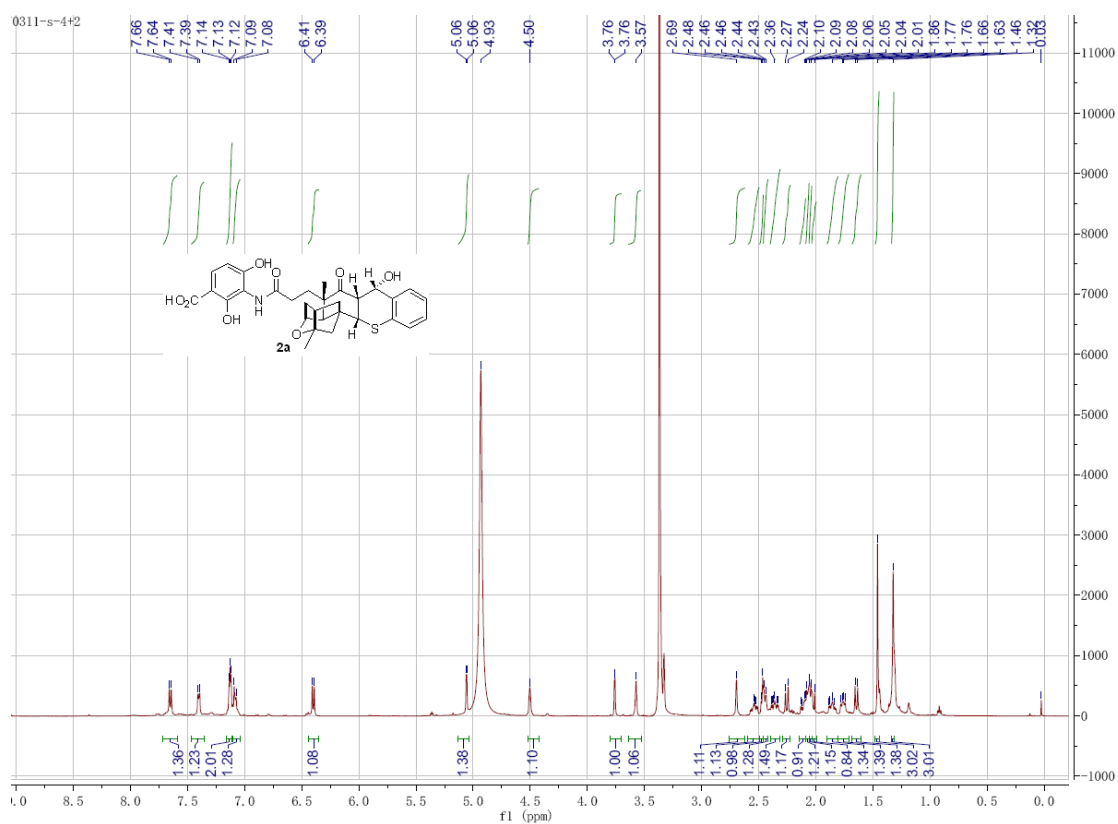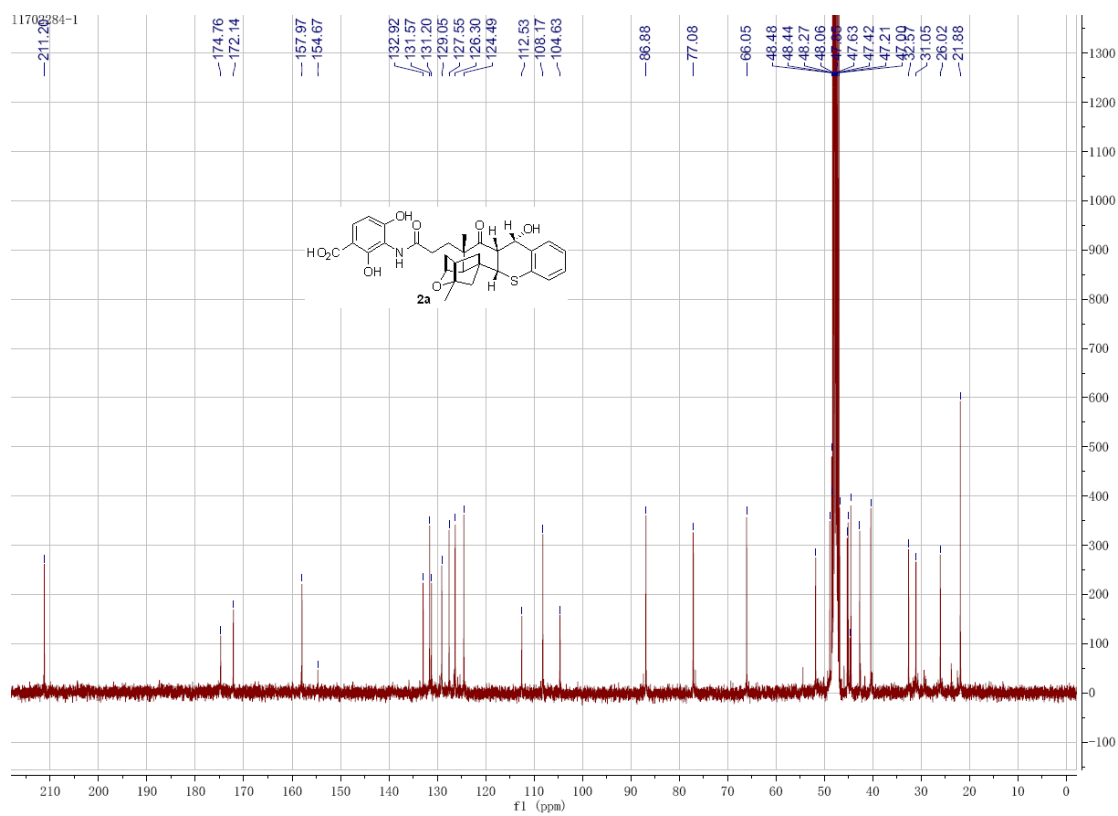

**Figure S3.**  $^1\text{H}$ - $^1\text{H}$  COSY spectrum of **2a** in  $\text{CD}_3\text{OD}$ .

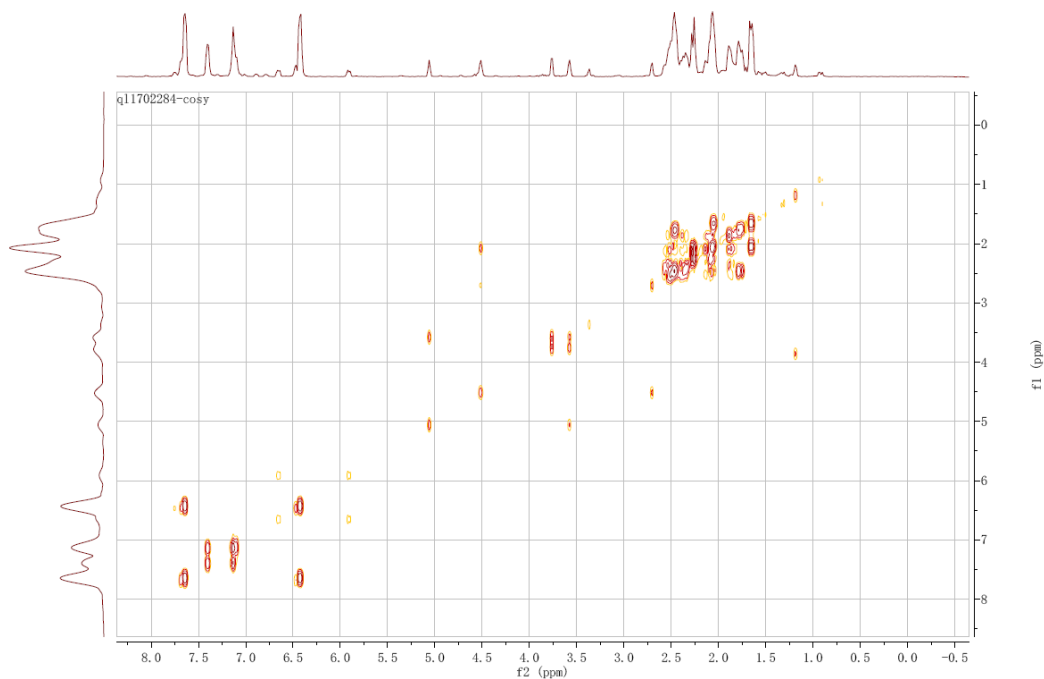

**Figure S4.**  $^1\text{H}$ - $^{13}\text{C}$  HSQC spectrum of **2a** in  $\text{CD}_3\text{OD}$ .

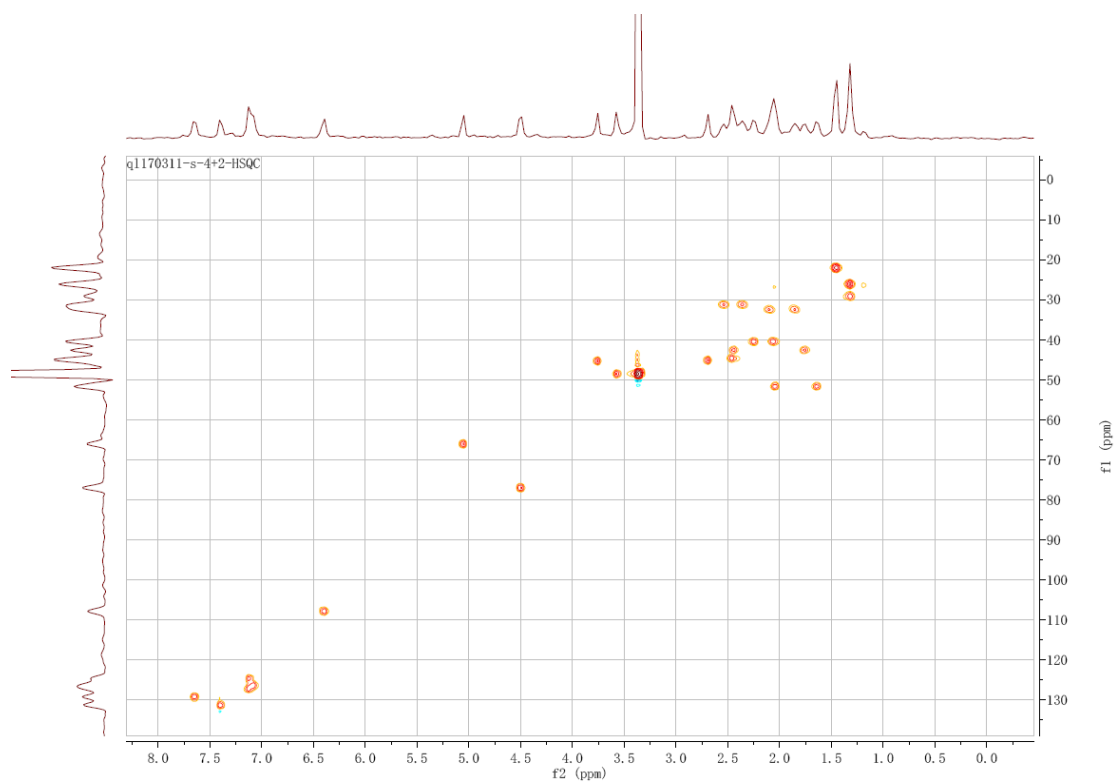



**Figure S5.**  $^1\text{H}$ - $^{13}\text{C}$  HMBC spectrum of **2a** in  $\text{CD}_3\text{OD}$ .

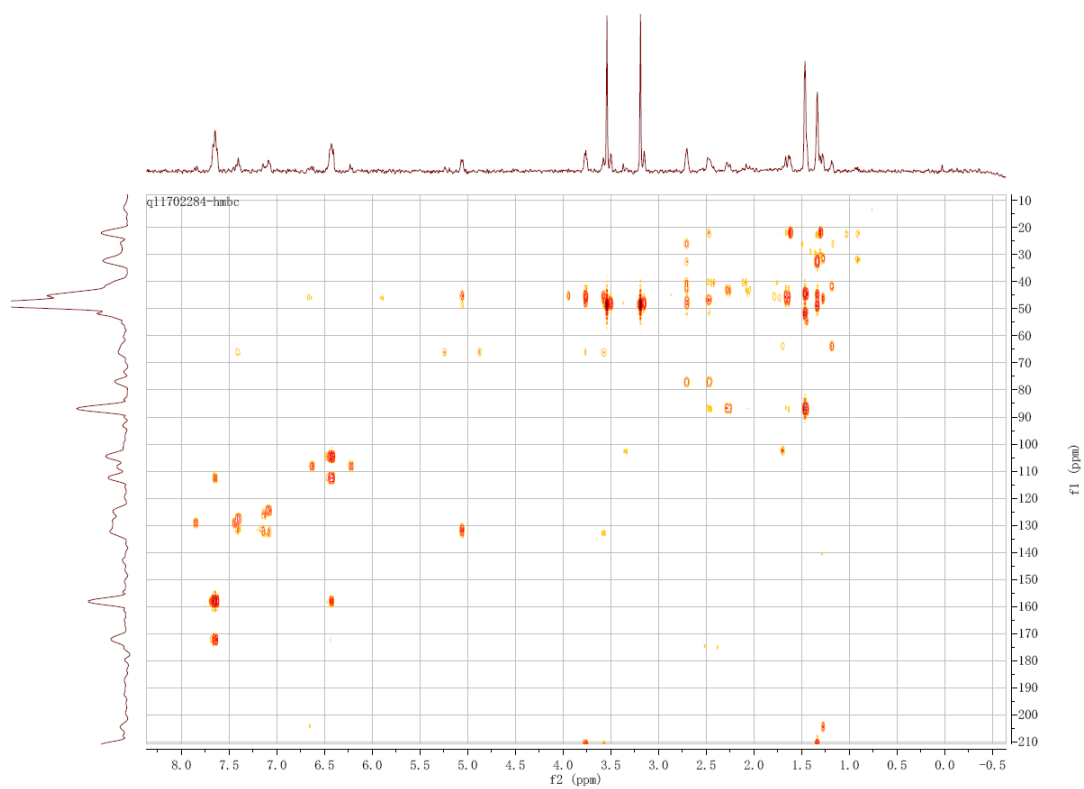

**Figure S6.**  $^1\text{H}$ - $^1\text{H}$  ROESY spectrum of **2a** in  $\text{CD}_3\text{OD}$ .

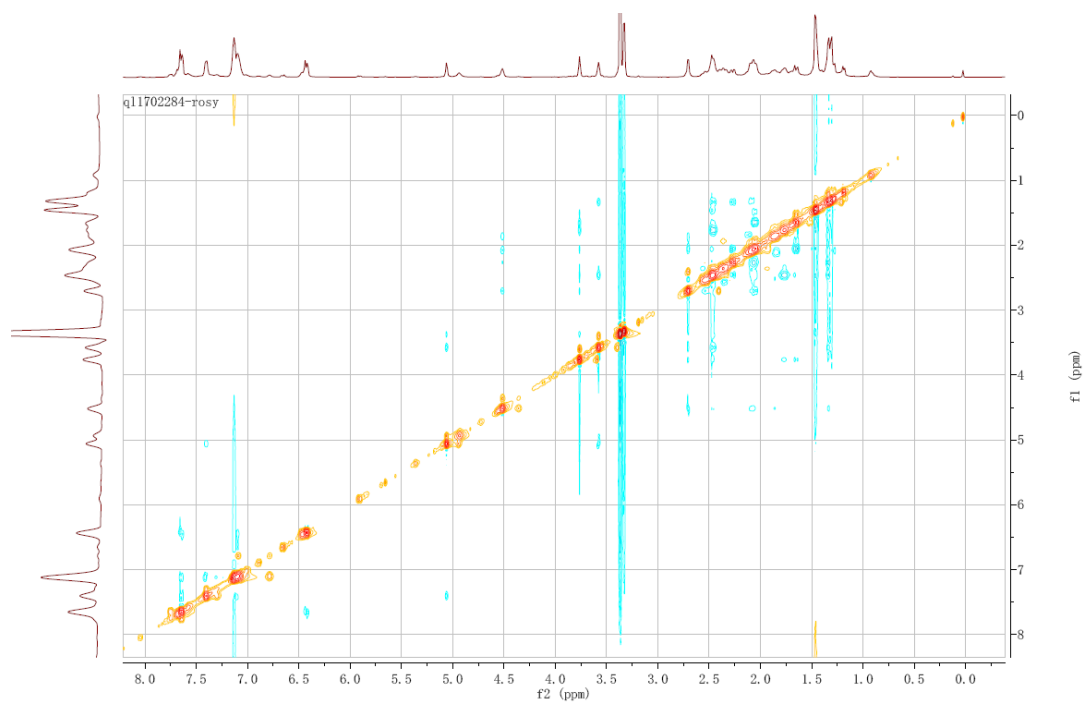

**Figure S7.** Zoomed in  $^1\text{H}$ - $^1\text{H}$  ROESY spectrum of **2a** in  $\text{CD}_3\text{OD}$  (3.0 – 5.5 ppm).

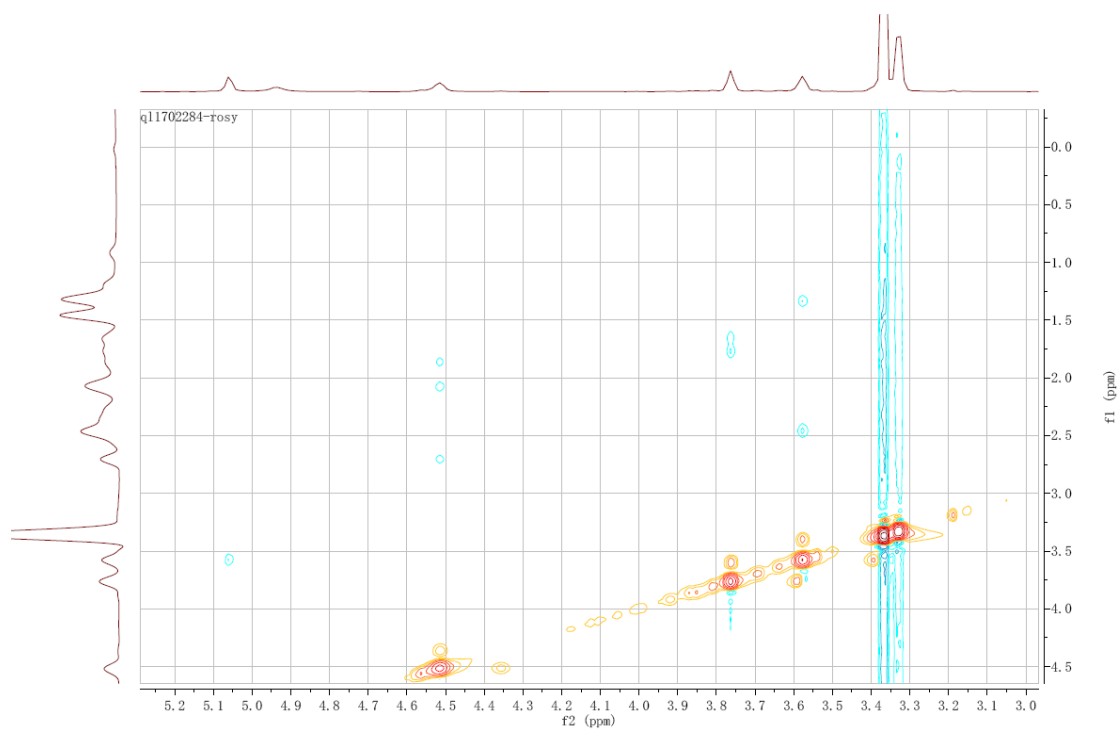

**Figure S8.**  $^1\text{H}$  NMR (400 MHz) and  $^{13}\text{C}$  NMR (101 MHz) spectrum of **4a** in  $\text{CDCl}_3$ .

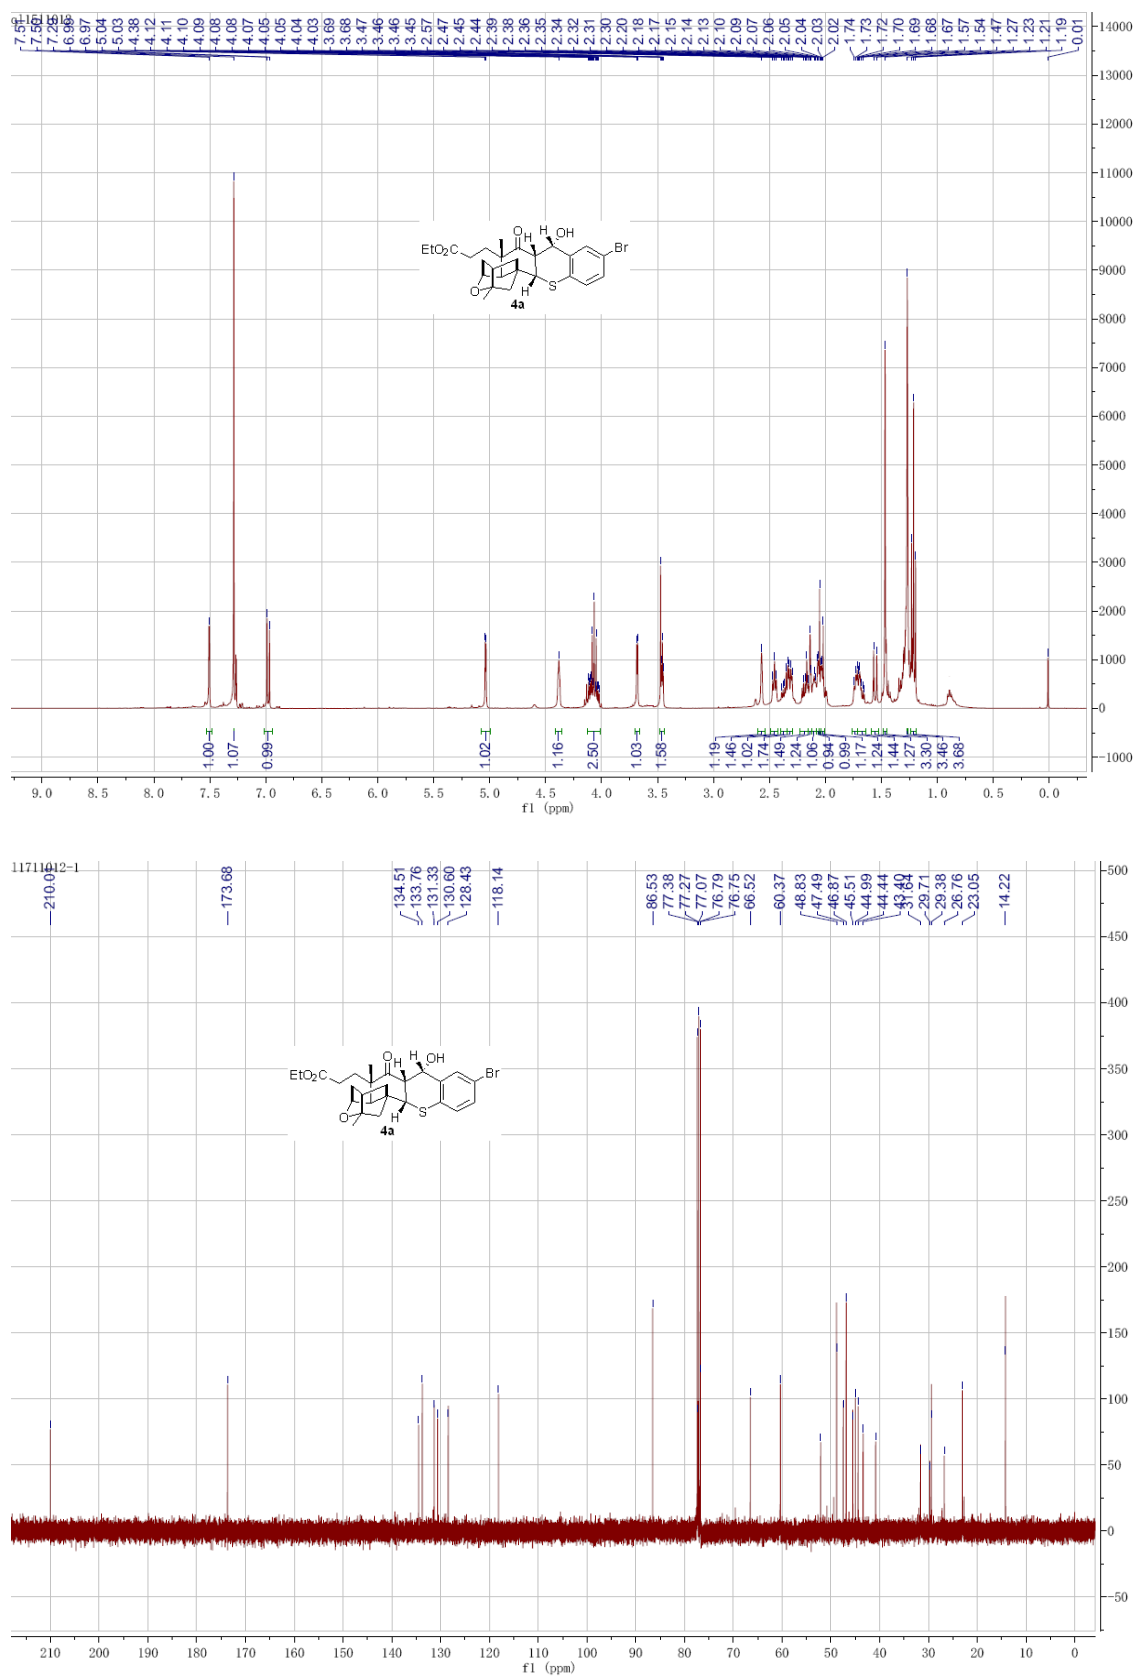

**Figure S9.**  $^1\text{H}$ - $^1\text{H}$  COSY spectrum of **4a** in  $\text{CDCl}_3$ .

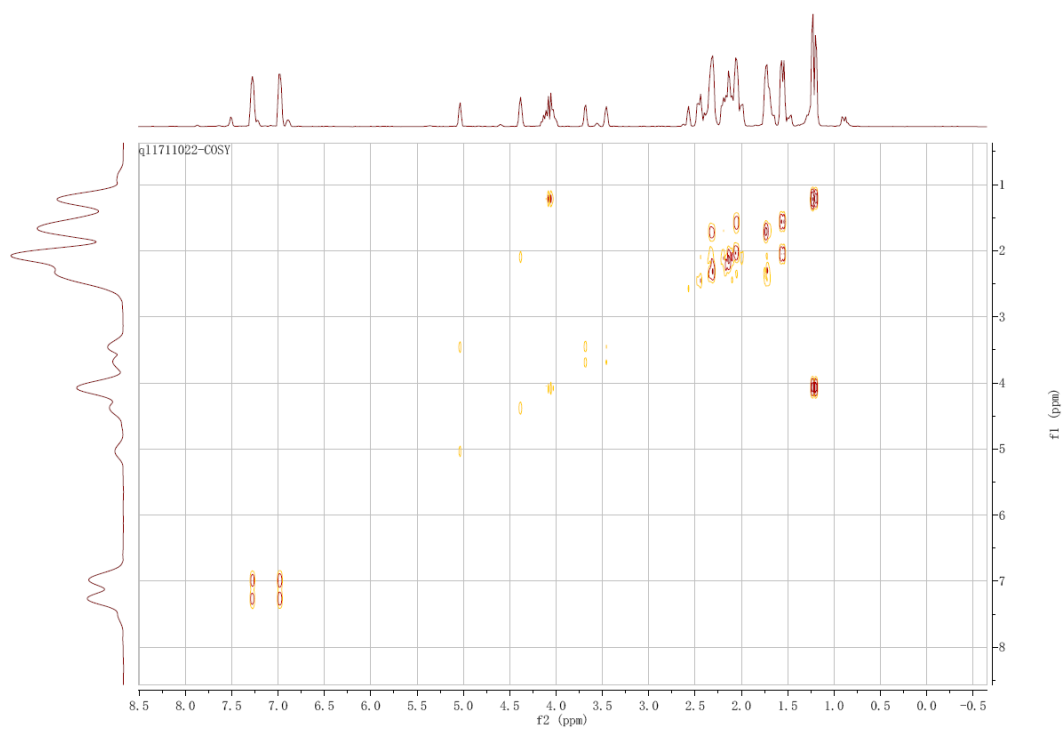

**Figure S10.**  $^1\text{H}$ - $^{13}\text{C}$  HSQC spectrum of **4a** in  $\text{CDCl}_3$ .

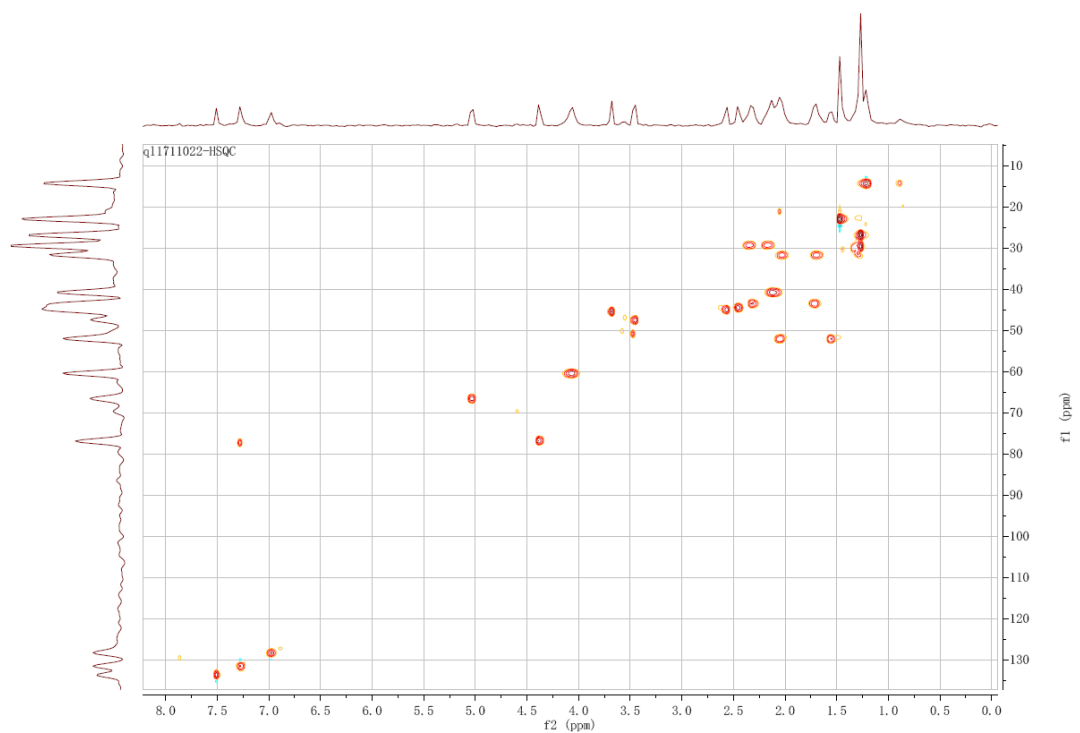

**Figure S11.**  $^1\text{H}$ - $^{13}\text{C}$  HMBC spectrum of **4a** in  $\text{CDCl}_3$ .

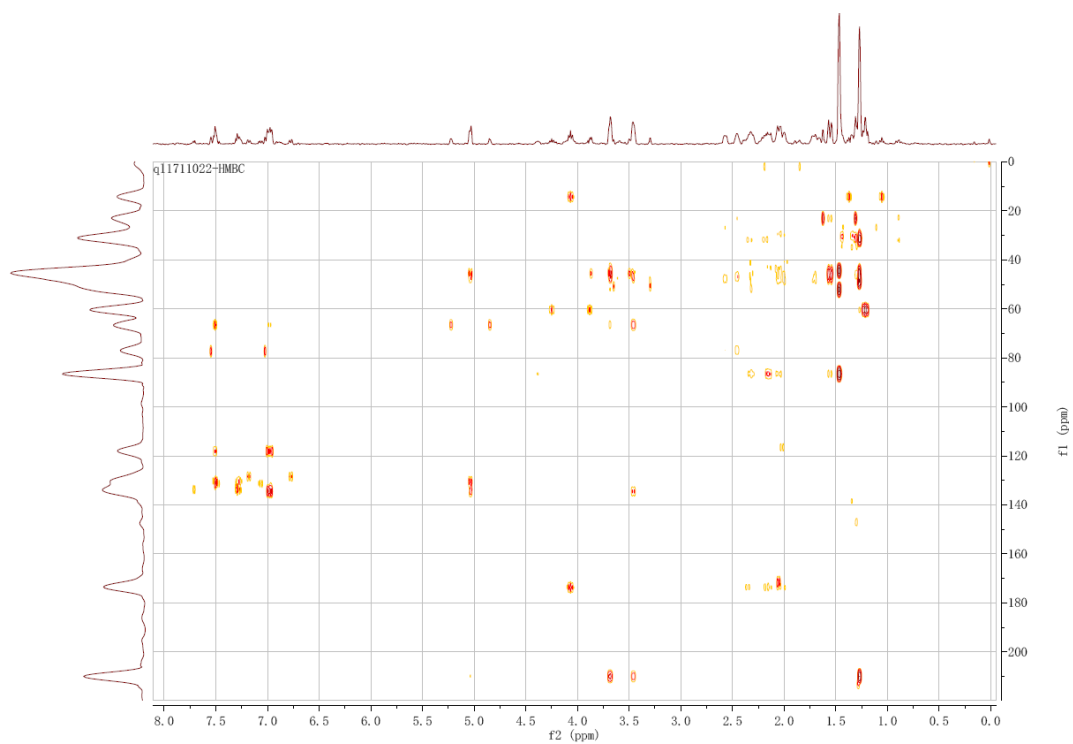

**Figure S12.**  $^1\text{H}$ - $^1\text{H}$  NOESY spectrum of **4a** in  $\text{CDCl}_3$ .

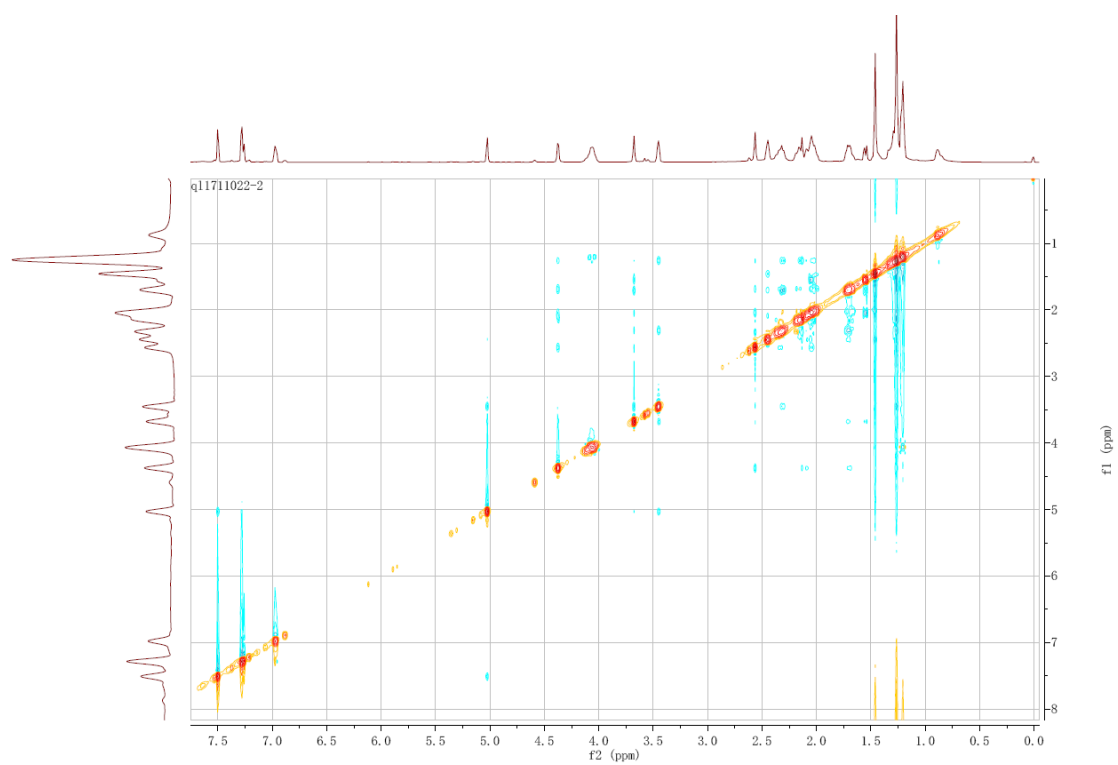

**Figure S13.** Zoomed in  $^1\text{H}$ - $^1\text{H}$  NOESY spectrum of **4a** in  $\text{CDCl}_3$  (3.0 – 5.5 ppm).

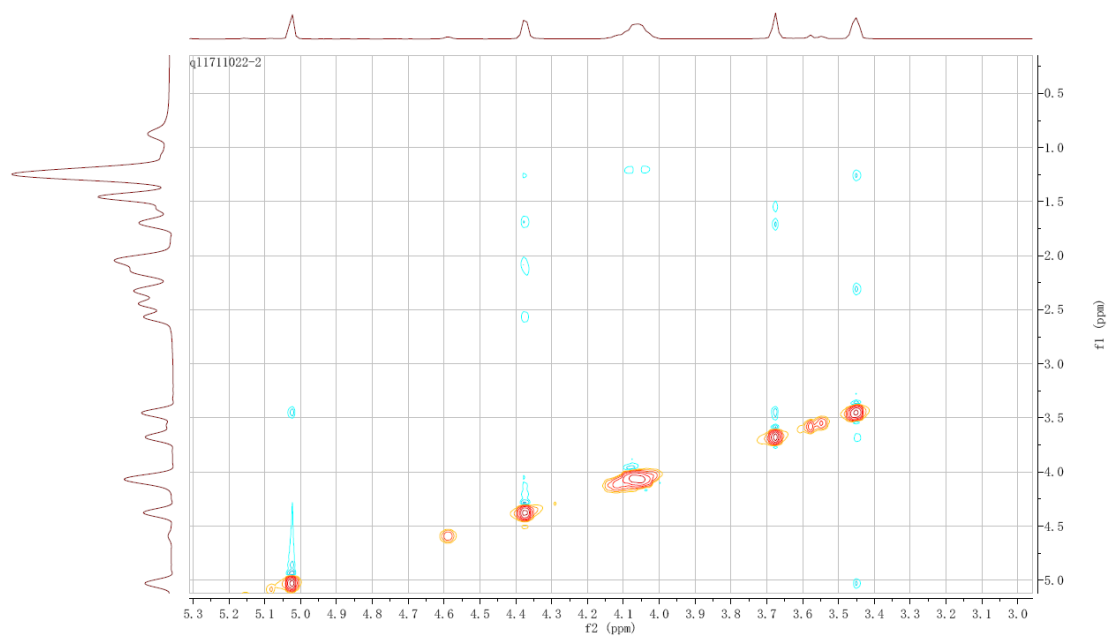

**Figure S14.**  $^1\text{H}$  NMR (400 MHz) and  $^{13}\text{C}$  NMR (101 MHz) spectrum of **5a** in  $\text{CDCl}_3$ .

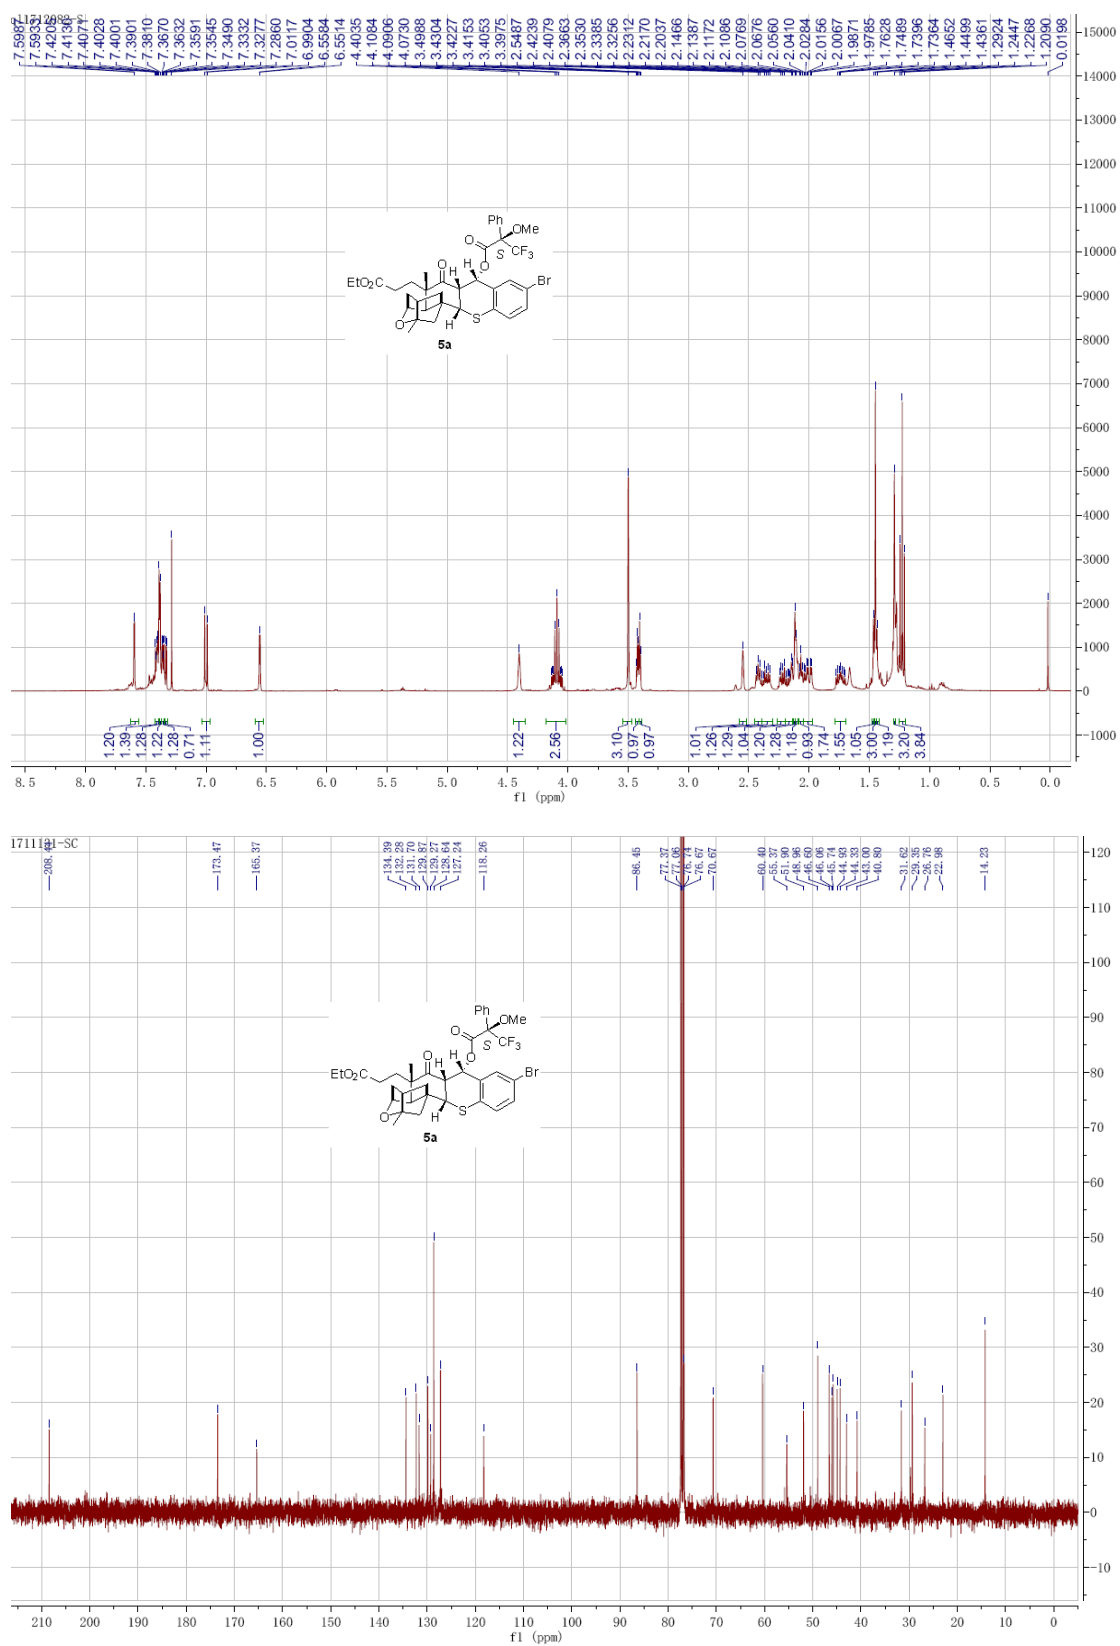

**Figure S15.**  $^1\text{H}$ - $^1\text{H}$  COSY spectrum of **5a** in  $\text{CDCl}_3$ .

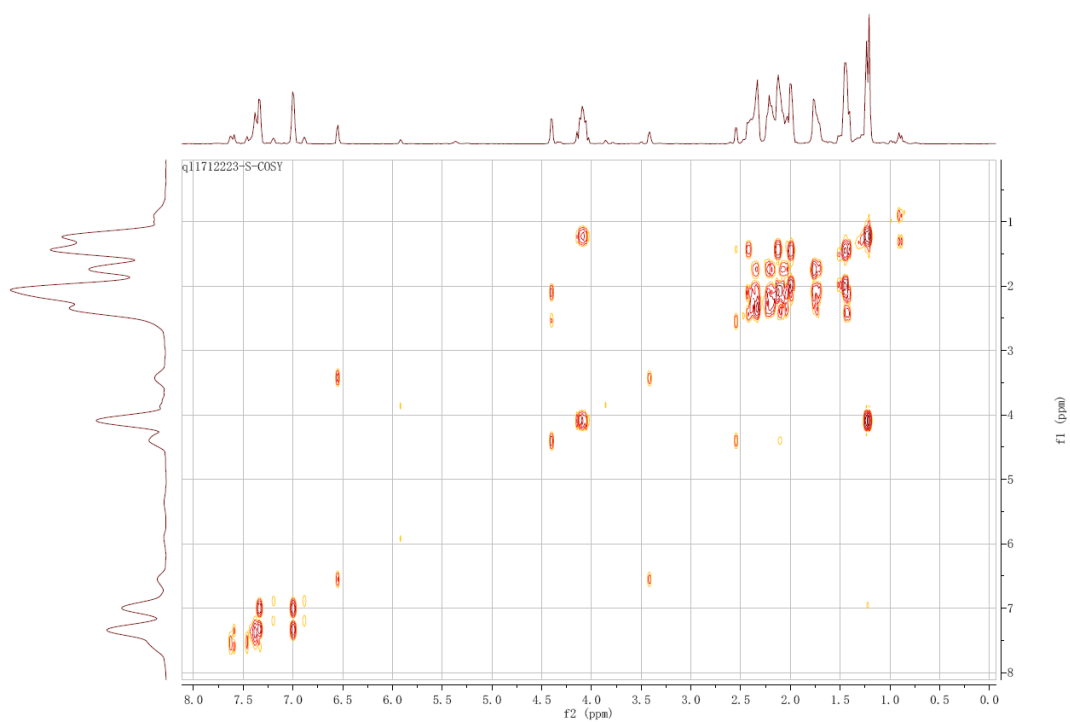

**Figure S16.**  $^1\text{H}$ - $^{13}\text{C}$  HSQC spectrum of **5a** in  $\text{CDCl}_3$ .

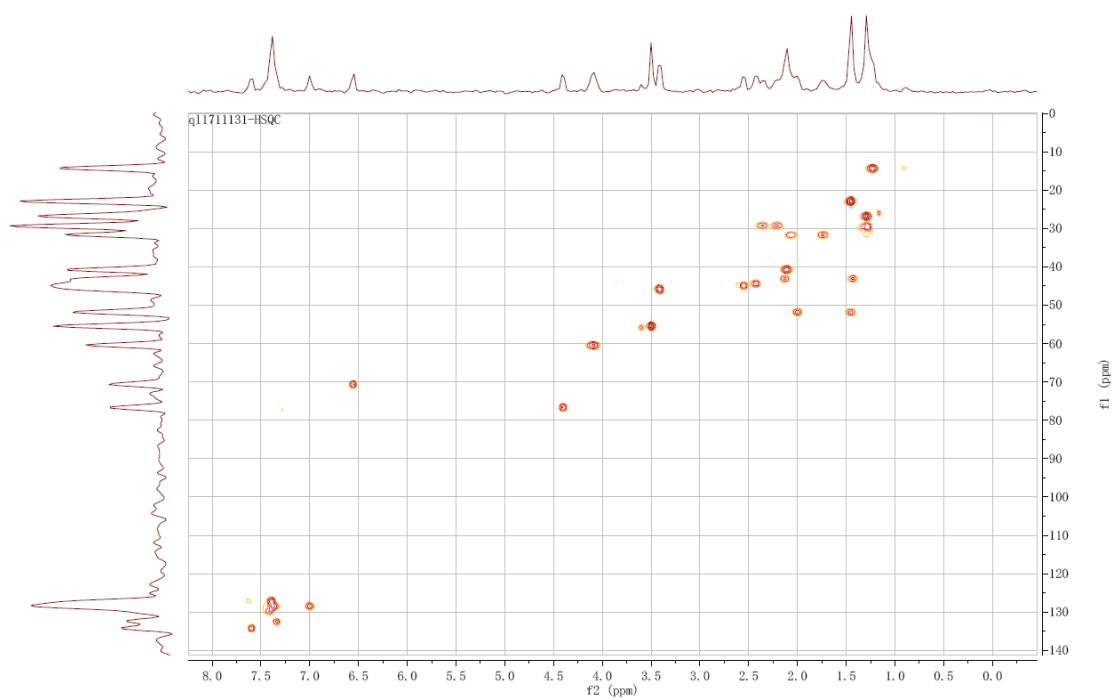



**Figure S17.**  $^1\text{H}$  NMR (400 MHz) and  $^{13}\text{C}$  NMR (101 MHz) spectrum of **5b** in  $\text{CDCl}_3$ .

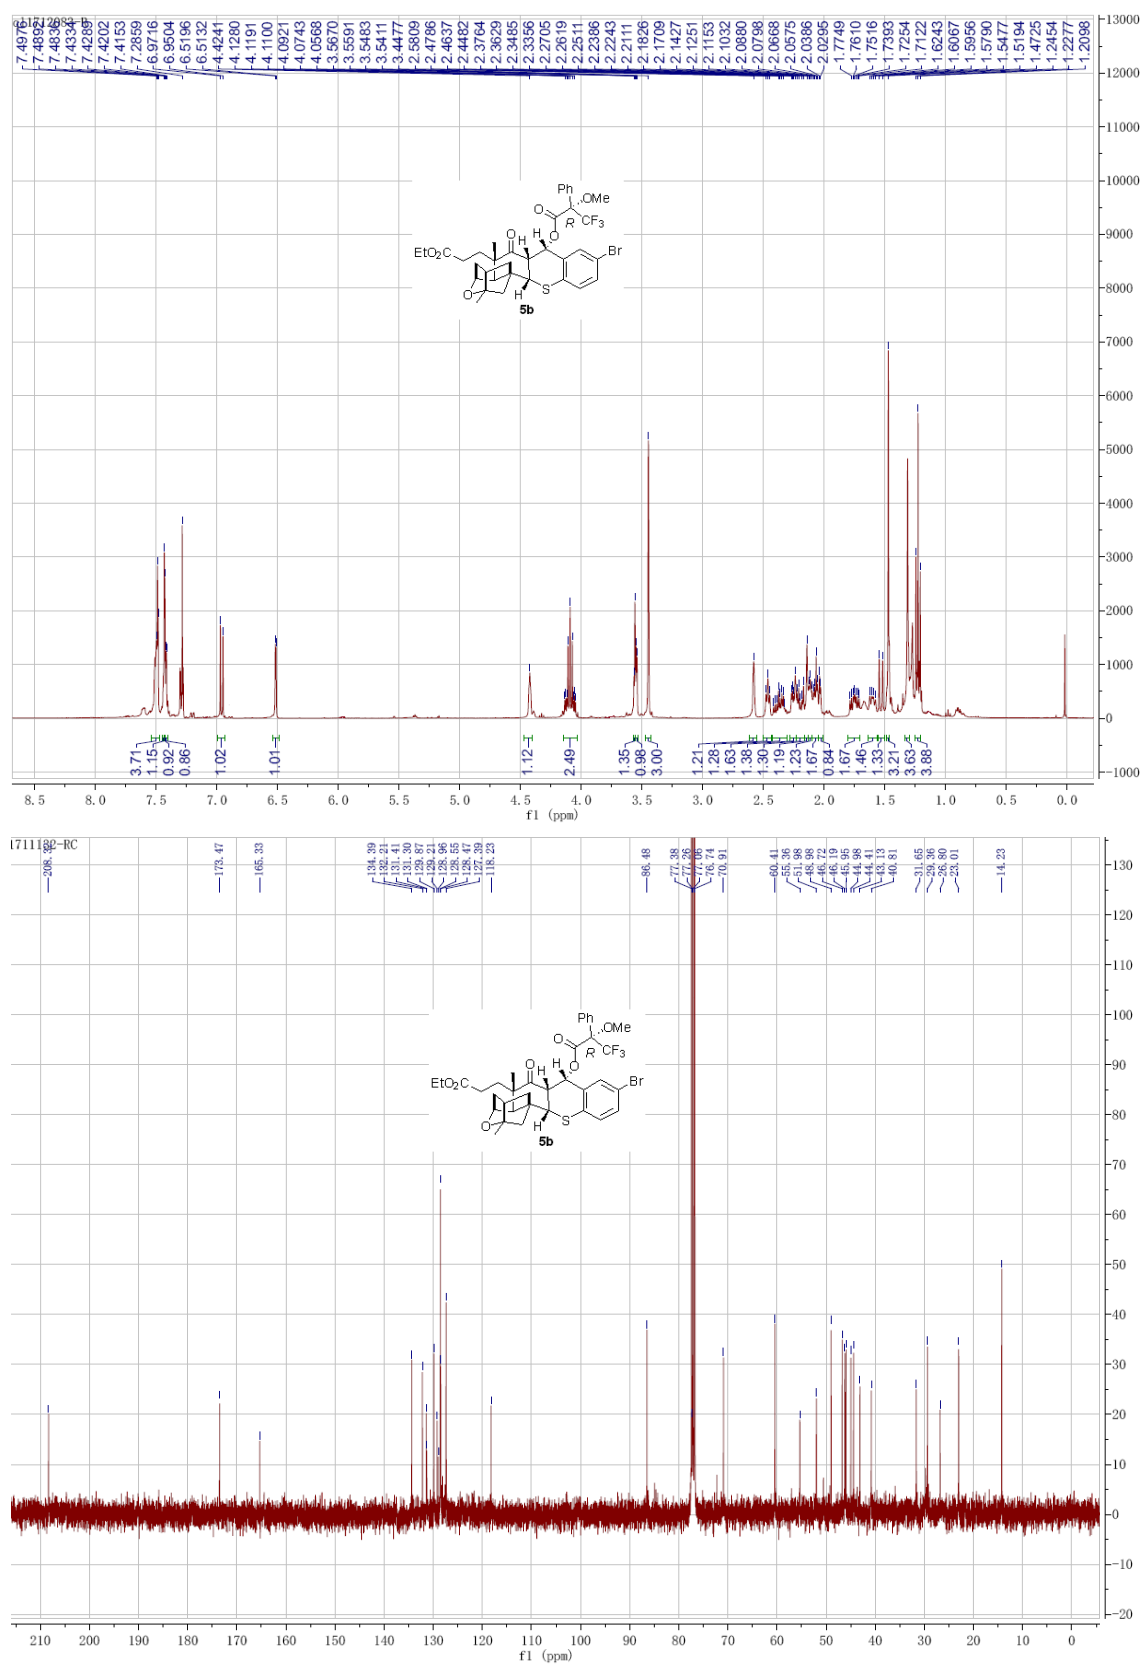

**Figure S18.**  $^1\text{H}$ - $^1\text{H}$  COSY spectrum of **5b** in  $\text{CDCl}_3$ .

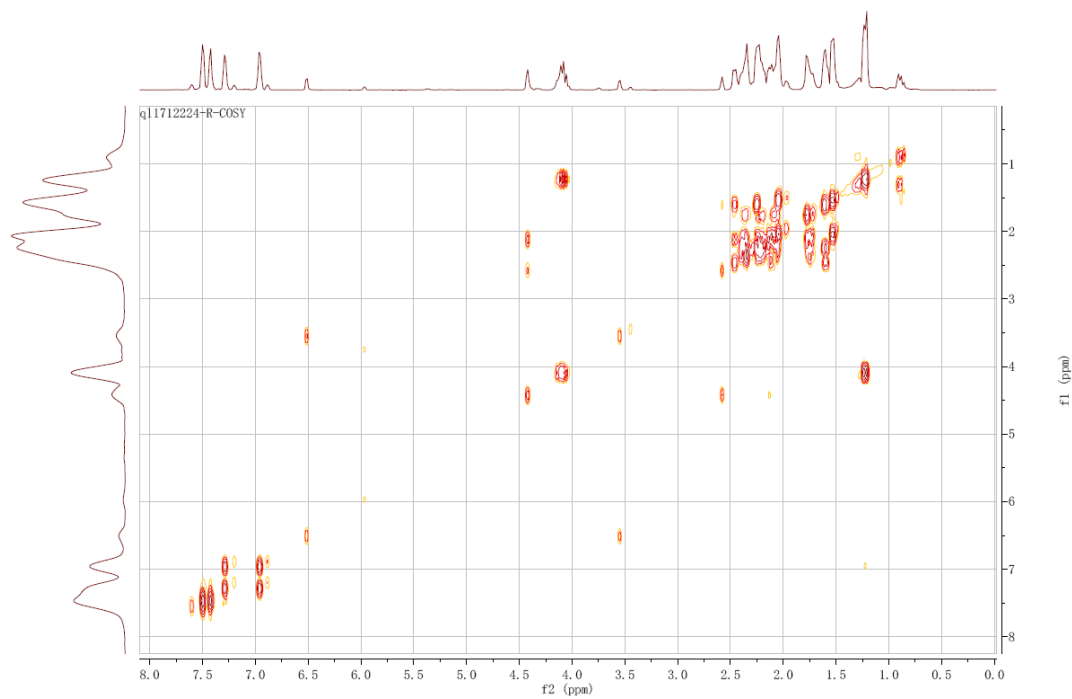

**Figure S19.**  $^1\text{H}$ - $^{13}\text{C}$  HSQC spectrum of **5b** in  $\text{CDCl}_3$ .

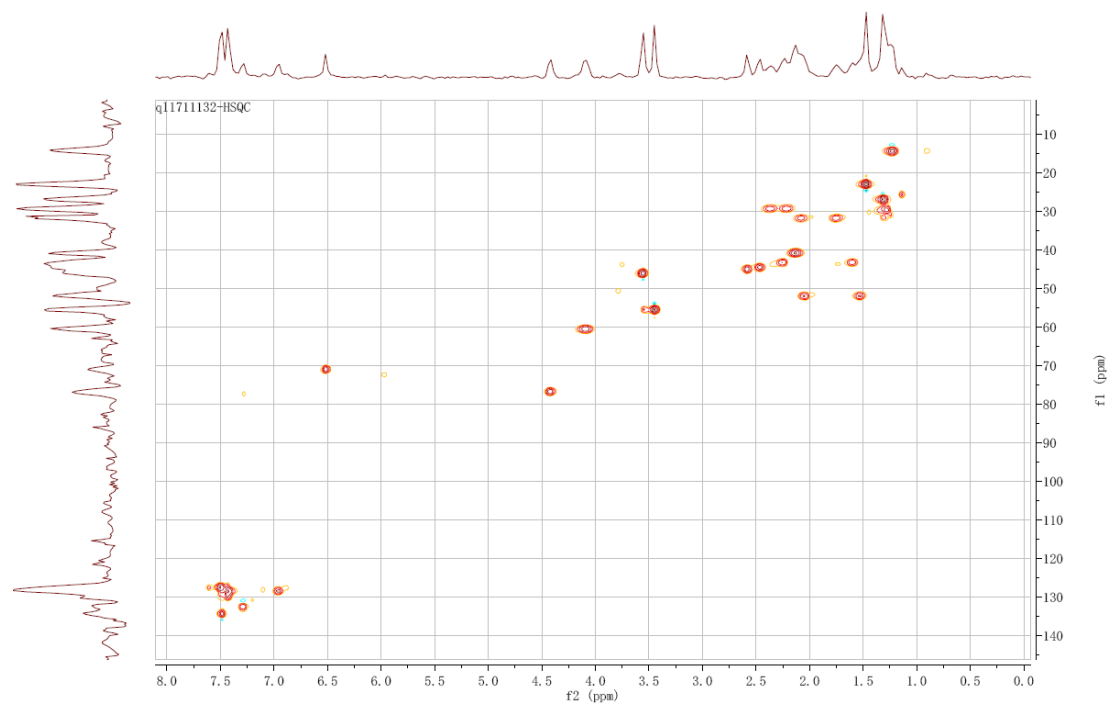

**Figure S20.**  $^1\text{H}$  NMR (400 MHz) and  $^{13}\text{C}$  NMR (101 MHz) spectrum of **6a** in  $\text{CD}_3\text{OD}$ .

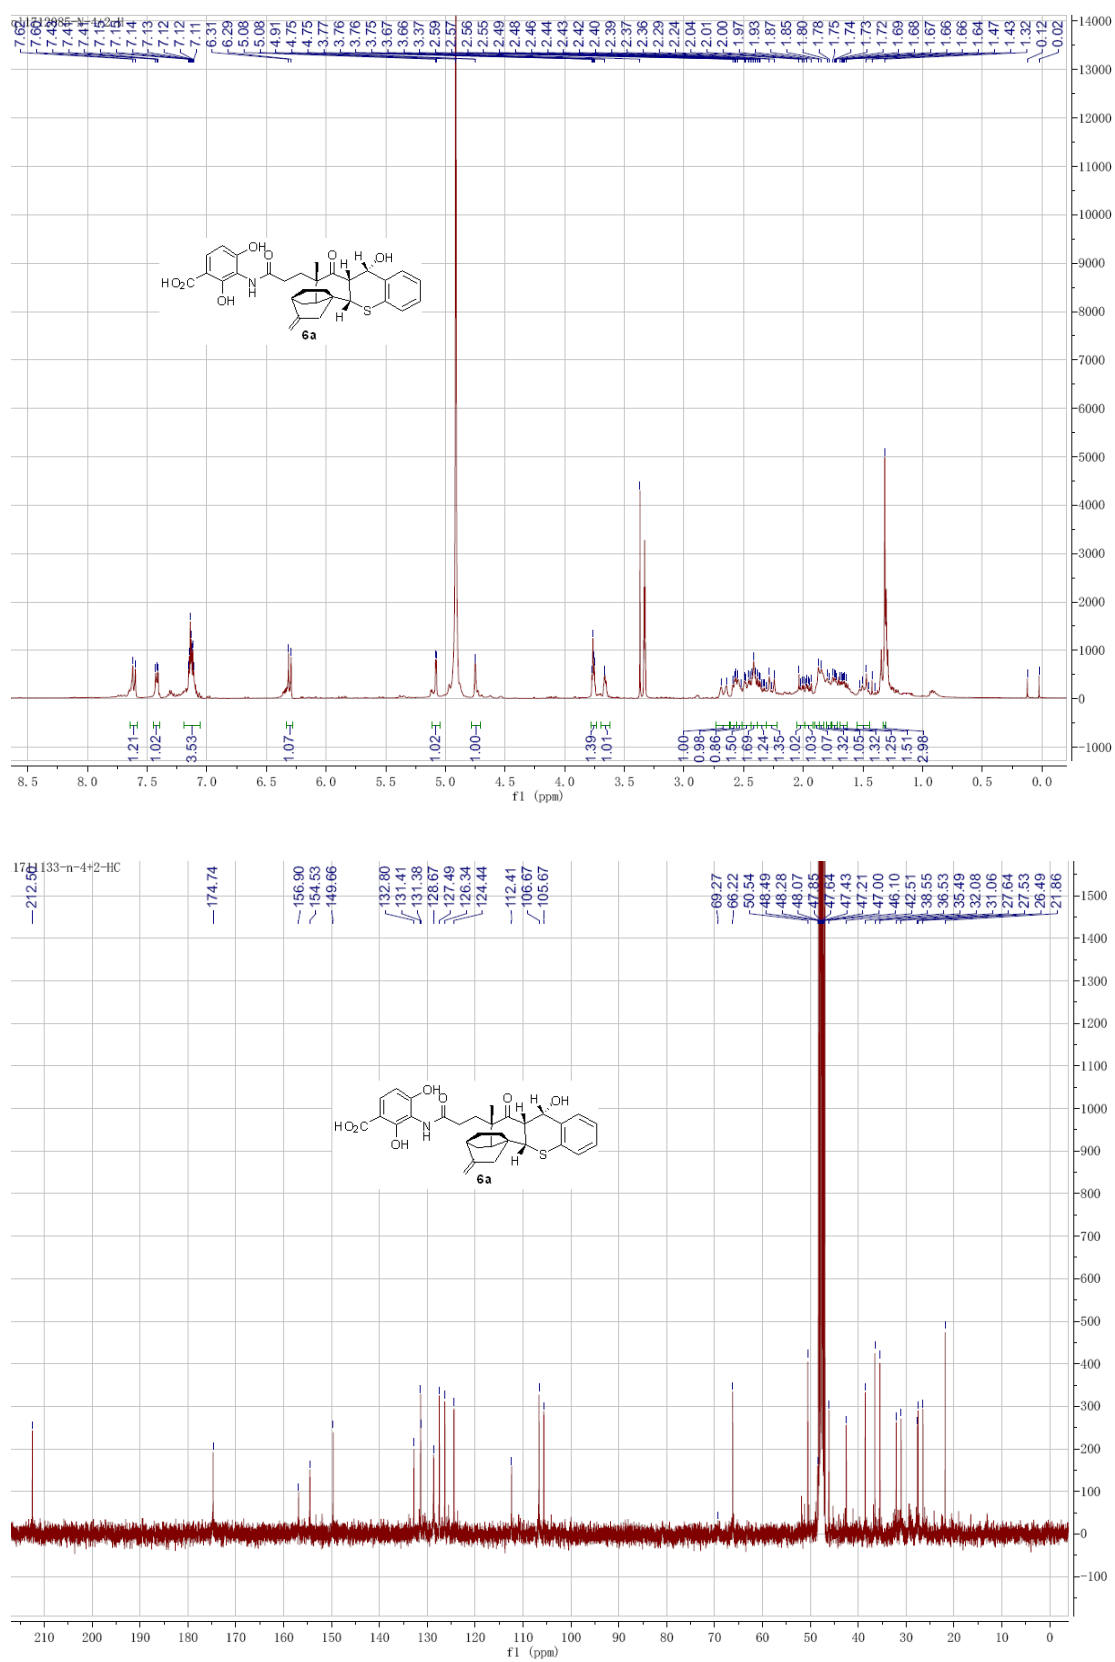

**Figure S21.**  $^1\text{H}$ - $^1\text{H}$  COSY spectrum of **6a** in  $\text{CD}_3\text{OD}$ .

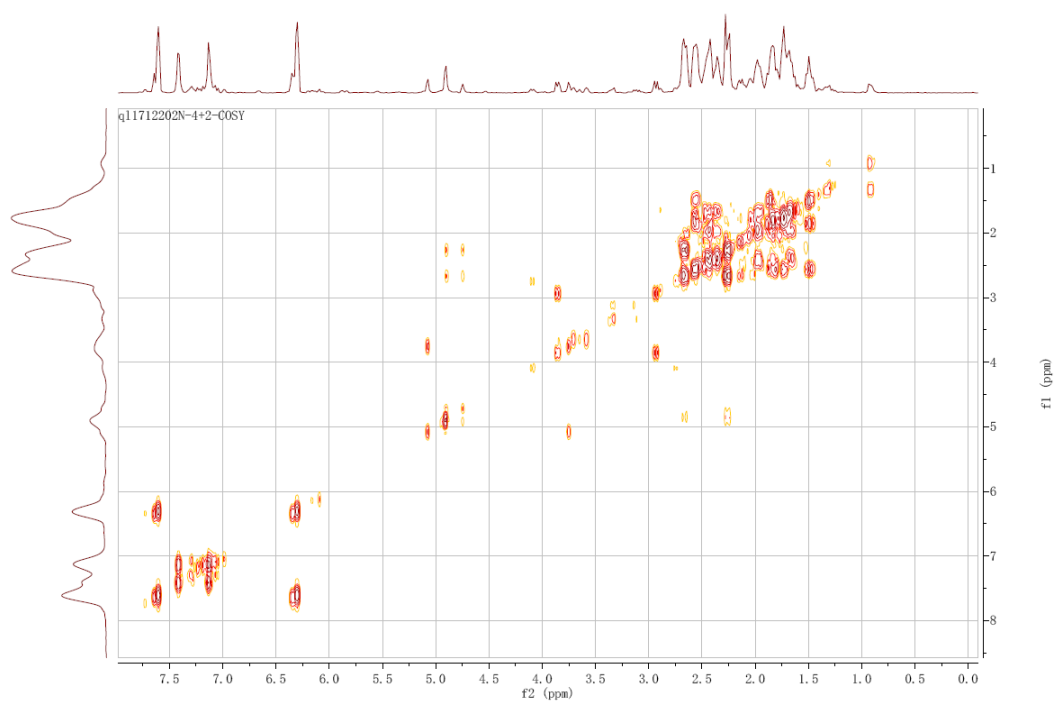

**Figure S22.**  $^1\text{H}$ - $^{13}\text{C}$  HSQC spectrum of **6a** in  $\text{CD}_3\text{OD}$ .

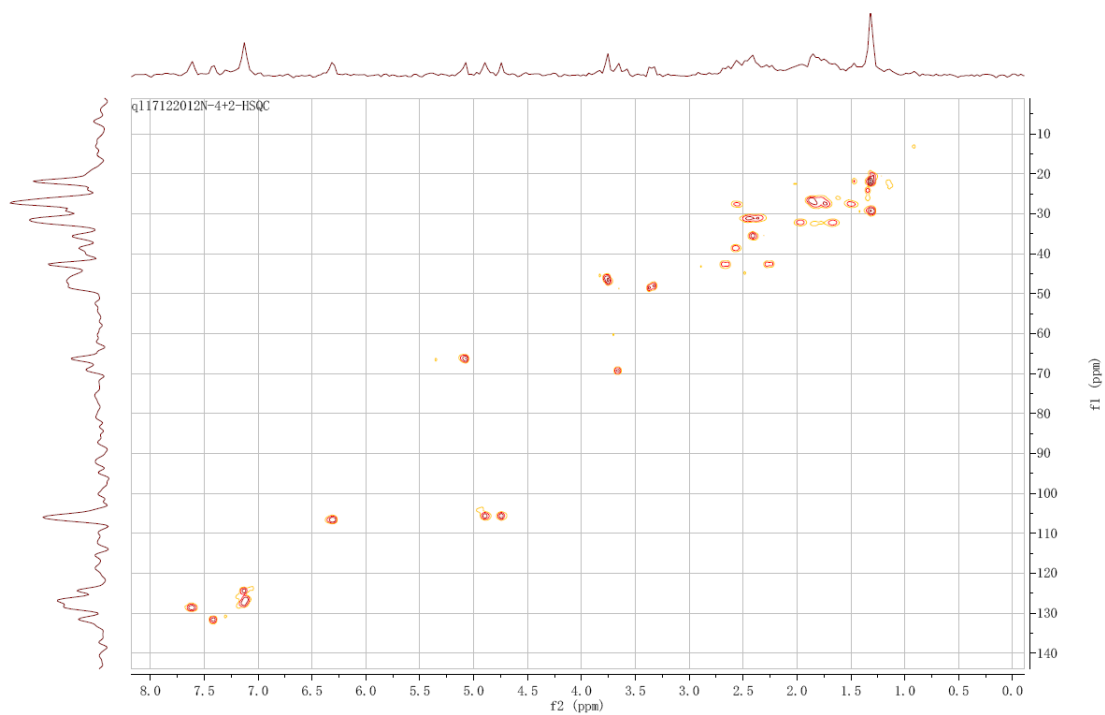

**Figure S23.**  $^1\text{H}$ - $^{13}\text{C}$  HMBC spectrum of **6a** in  $\text{CD}_3\text{OD}$ .

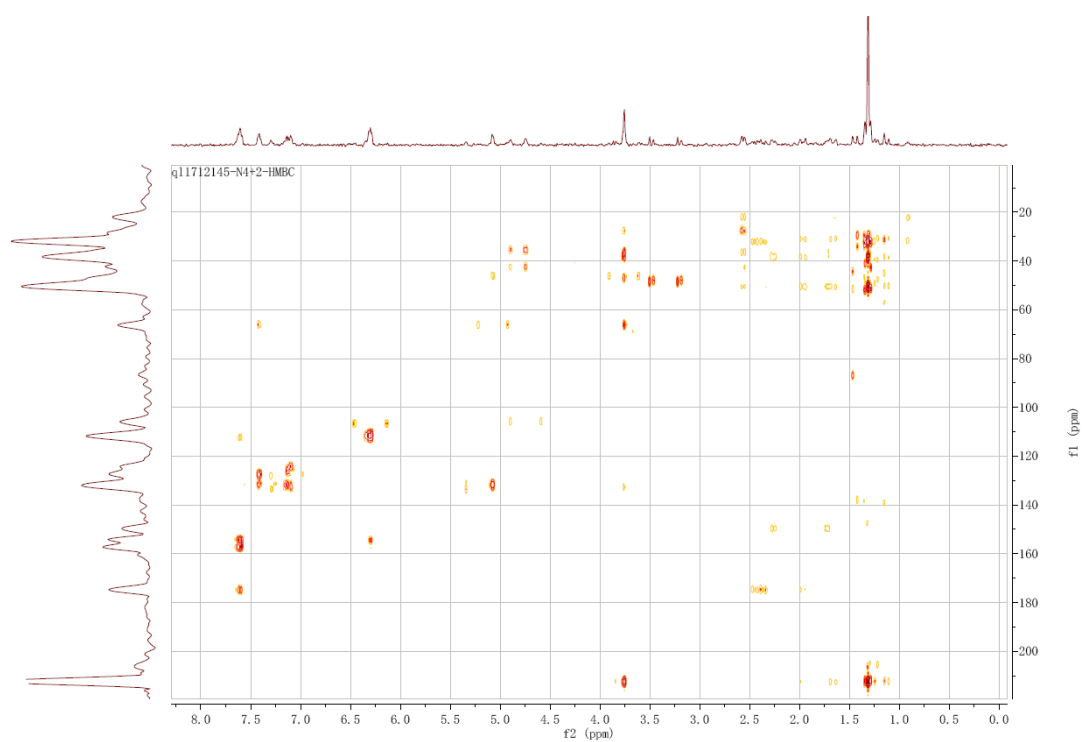

**Figure S24.**  $^1\text{H}$ - $^1\text{H}$  NOESY spectrum of **6a** in  $\text{CD}_3\text{OD}$ .

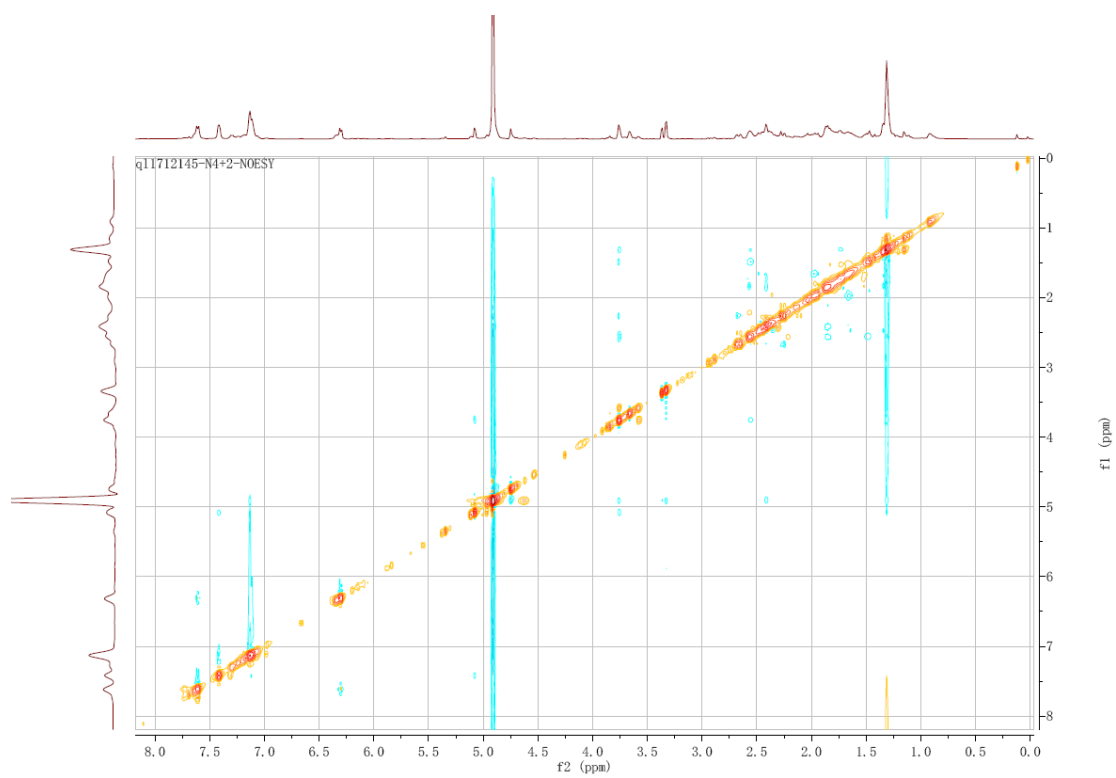

**Figure S25.** Zoomed in  $^1\text{H}$ - $^1\text{H}$  NOESY spectrum of **6a** in  $\text{CDCl}_3$  (3.0 – 5.5 ppm).

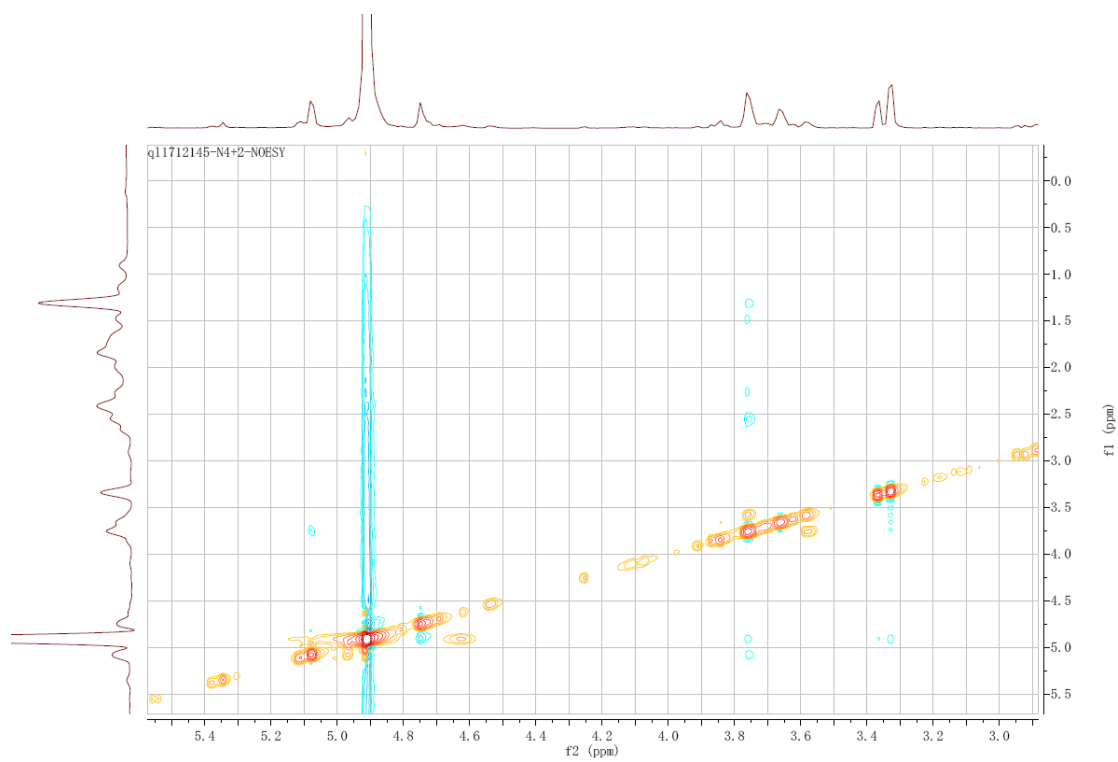

**Figure S26.**  $^1\text{H}$  NMR (500 MHz) and  $^{13}\text{C}$  NMR (126 MHz) spectrum of **8a** in  $\text{CD}_3\text{OD}$ .

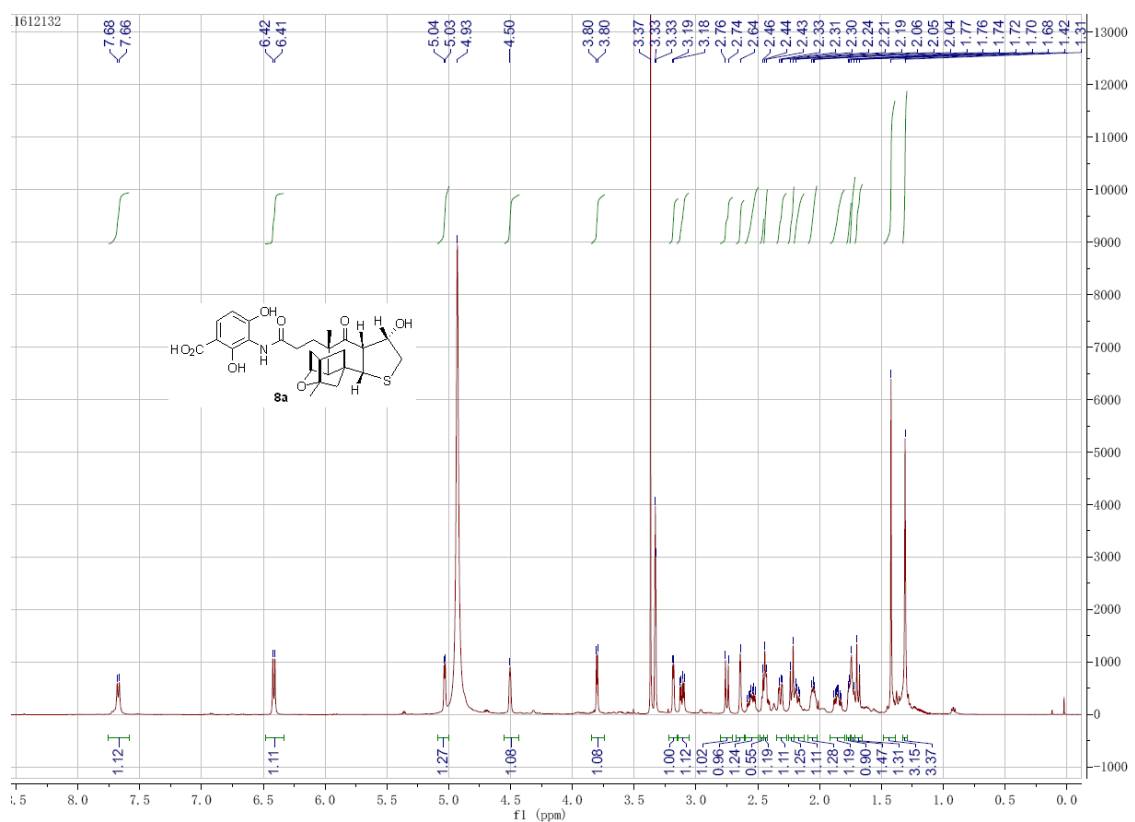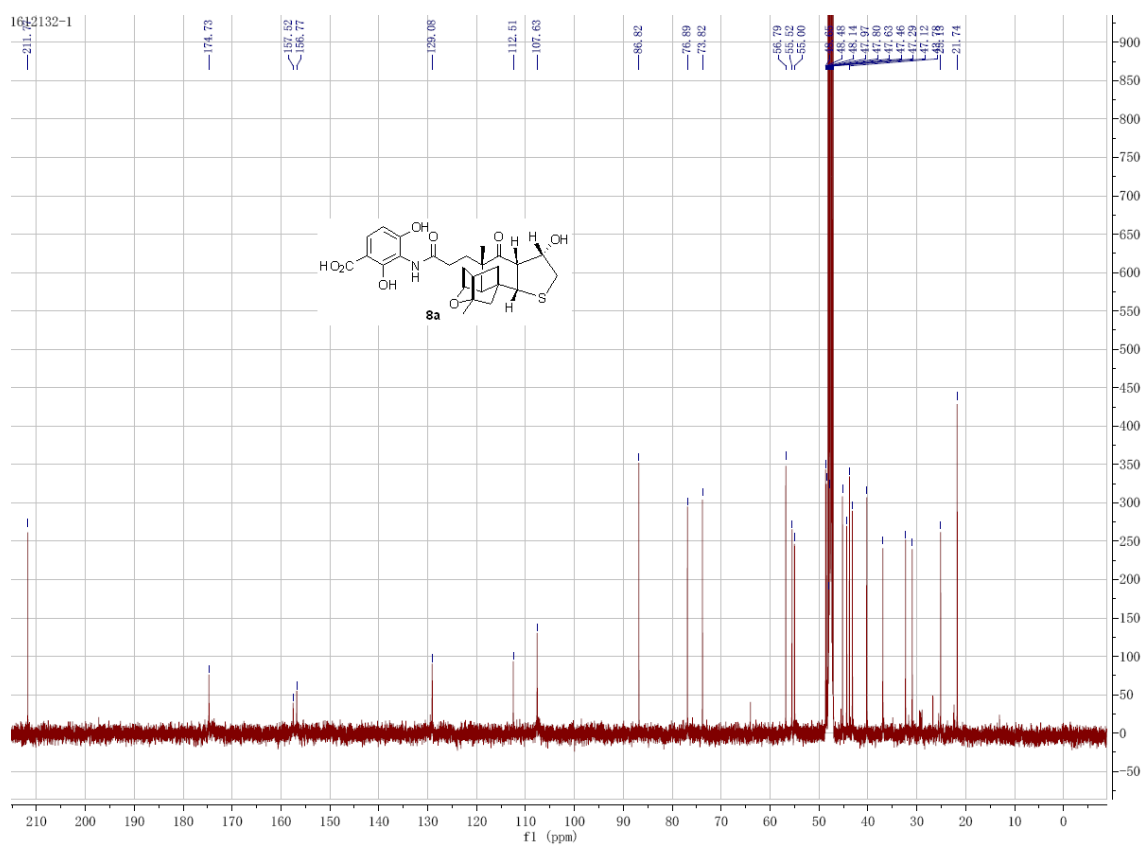

**Figure S27.**  $^1\text{H}$ - $^1\text{H}$  COSY spectrum of **8a** in  $\text{CD}_3\text{OD}$ .

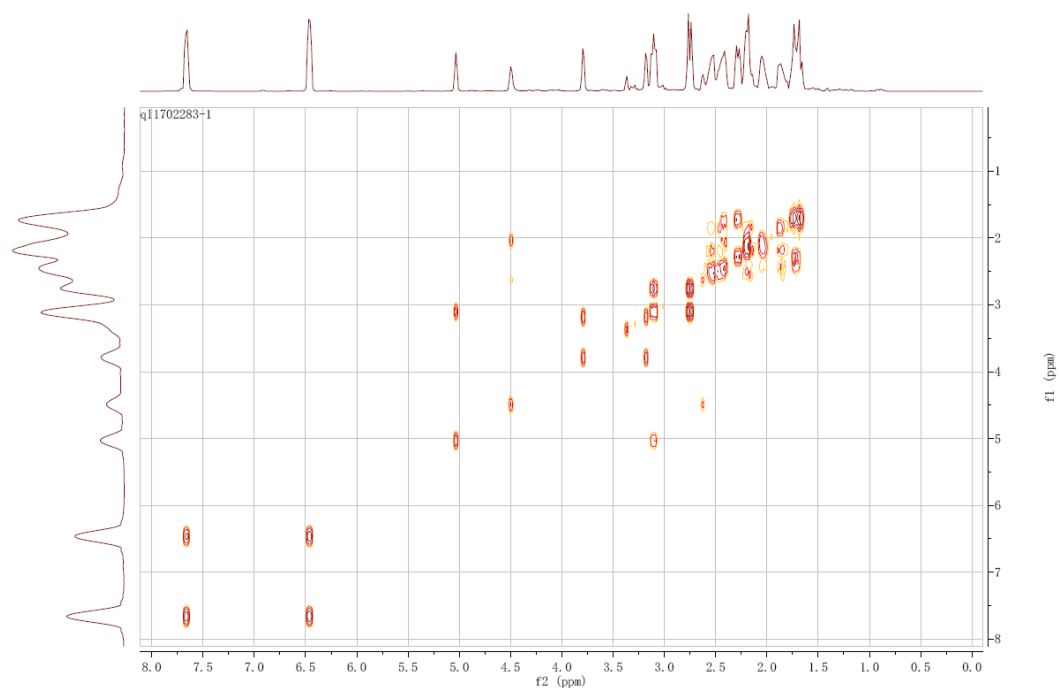

**Figure S28.**  $^1\text{H}$ - $^{13}\text{C}$  HSQC spectrum of **8a** in  $\text{CD}_3\text{OD}$ .

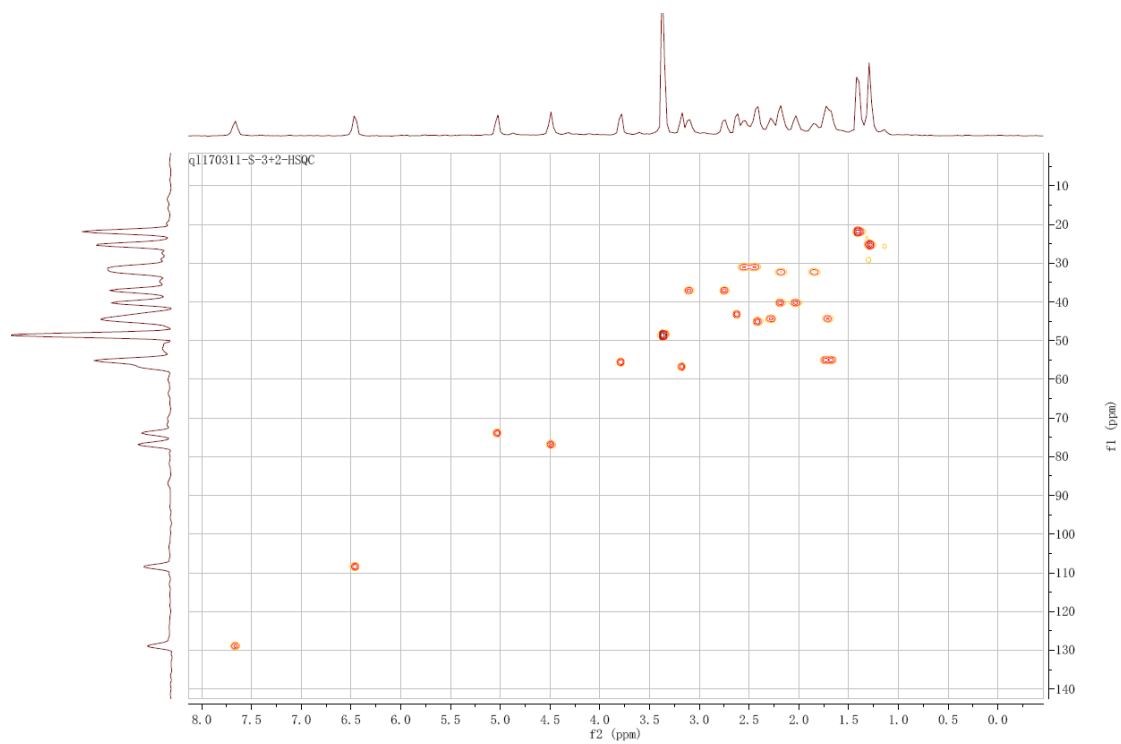



**Figure S29.**  $^1\text{H}$ - $^{13}\text{C}$  HMBC spectrum of **8a** in  $\text{CD}_3\text{OD}$ .

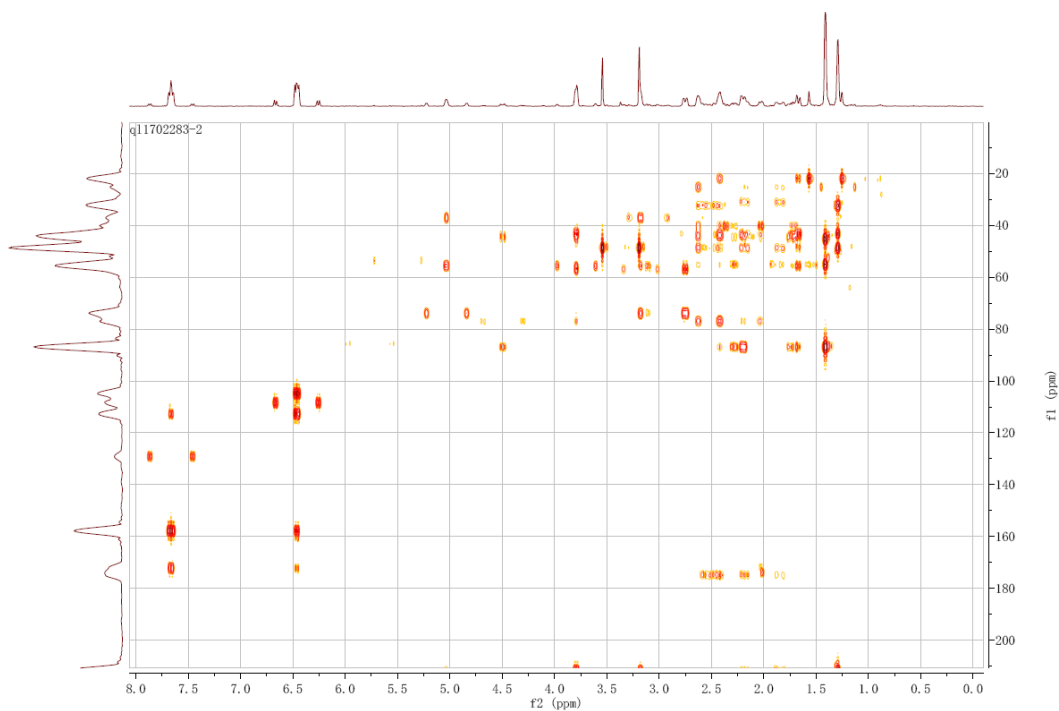

**Figure S30.**  $^1\text{H}$ - $^1\text{H}$  ROESY spectrum of **8a** in  $\text{CD}_3\text{OD}$ .

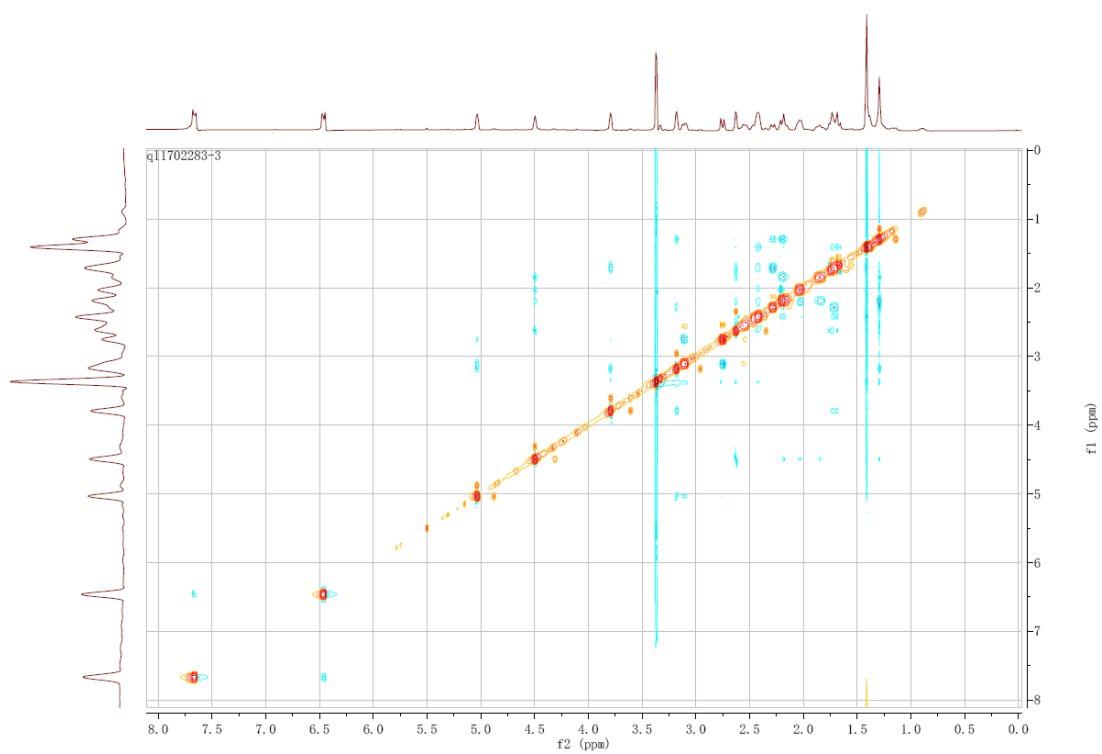

**Figure S31.** Zoomed in  $^1\text{H}$ - $^1\text{H}$  ROESY spectrum of **8a** in  $\text{CDCl}_3$  (3.0 – 5.5 ppm).

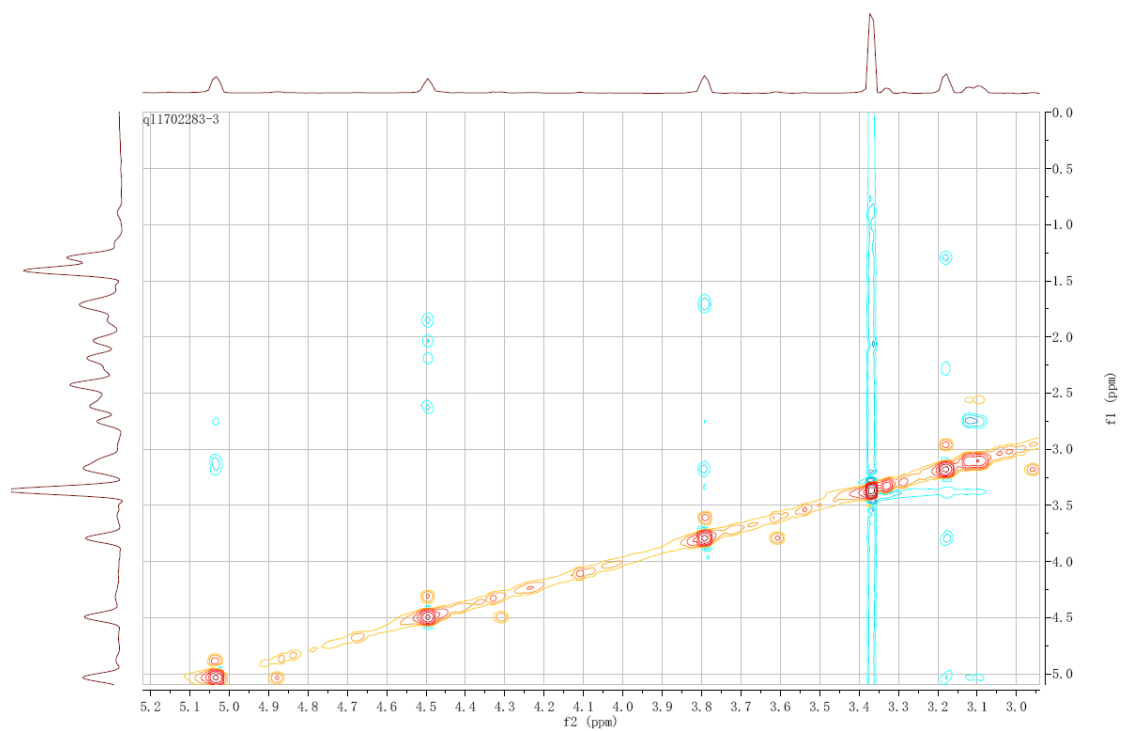

**Figure S32.**  $^1\text{H}$  NMR (400 MHz) and  $^{13}\text{C}$  NMR (101 MHz) spectrum of **9a** in  $\text{CD}_3\text{OD}$ .

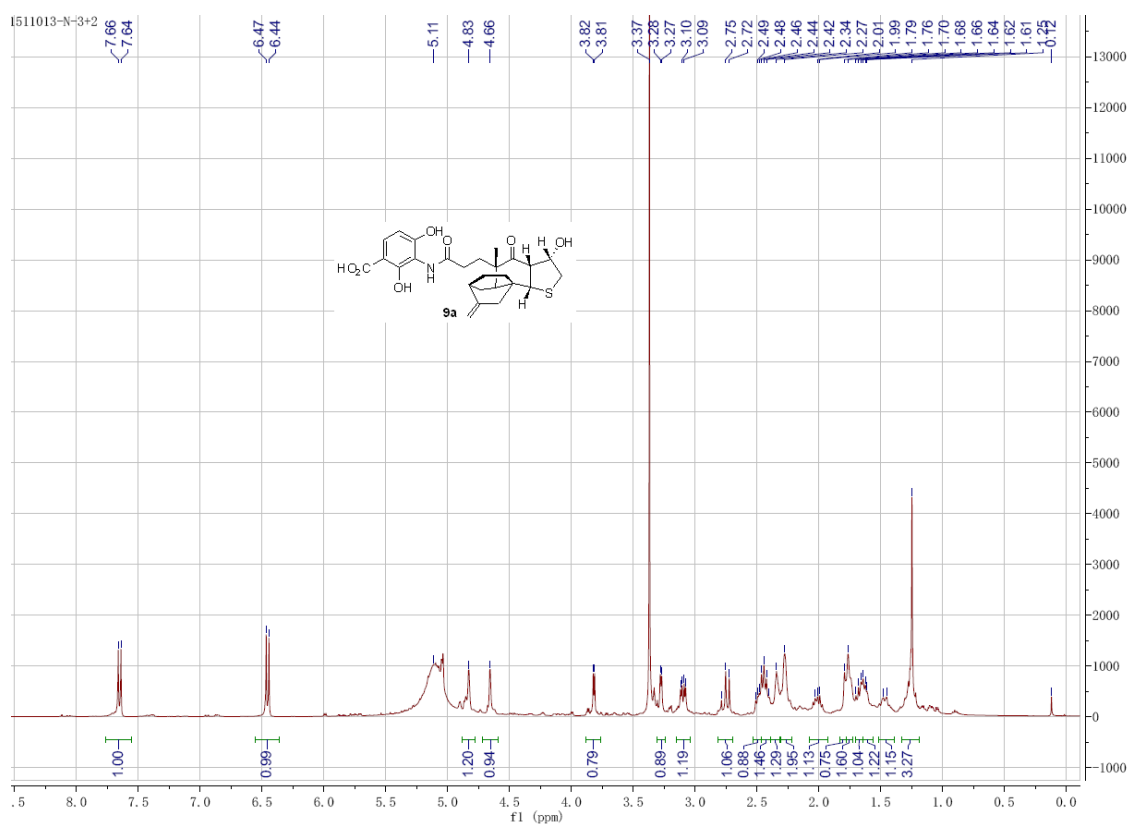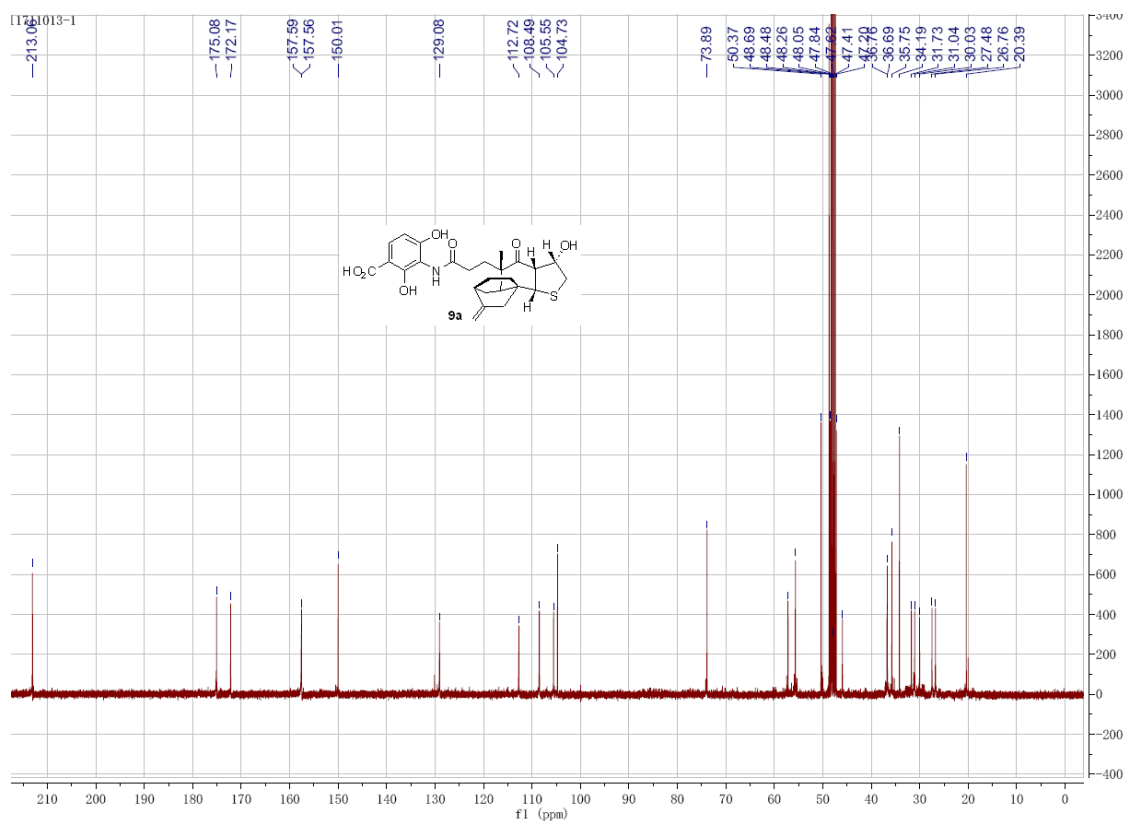

**Figure S33.**  $^1\text{H}$ - $^1\text{H}$  COSY spectrum of **9a** in  $\text{CD}_3\text{OD}$ .

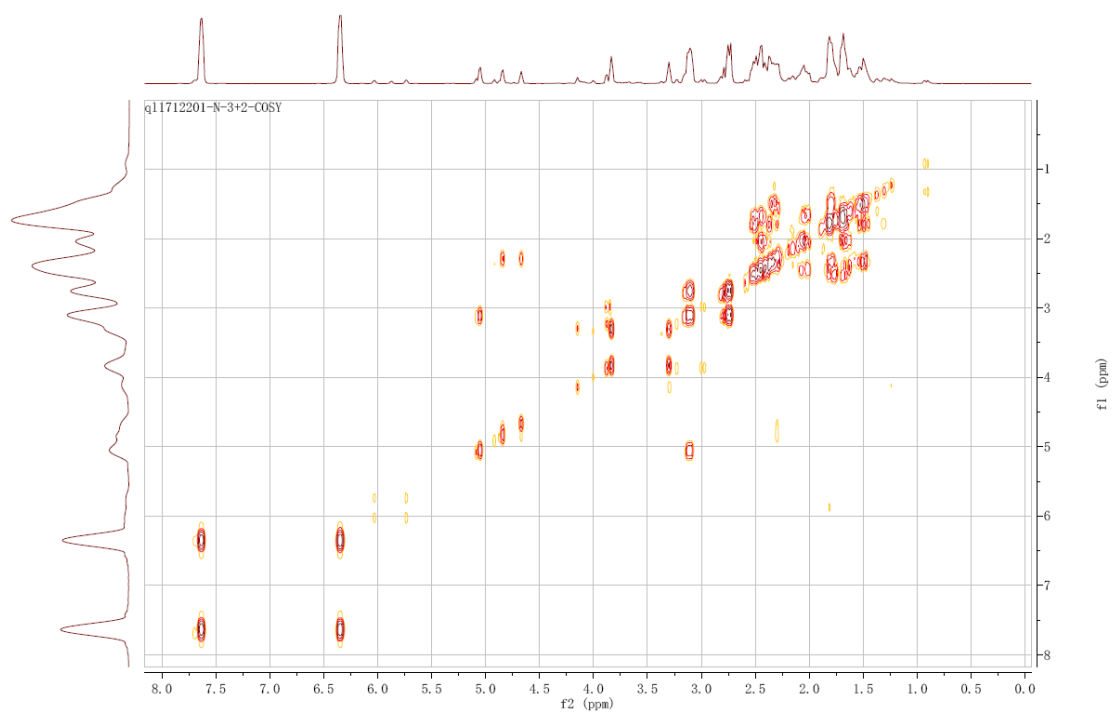

**Figure S34.**  $^1\text{H}$ - $^{13}\text{C}$  HSQC spectrum of **9a** in  $\text{CD}_3\text{OD}$ .

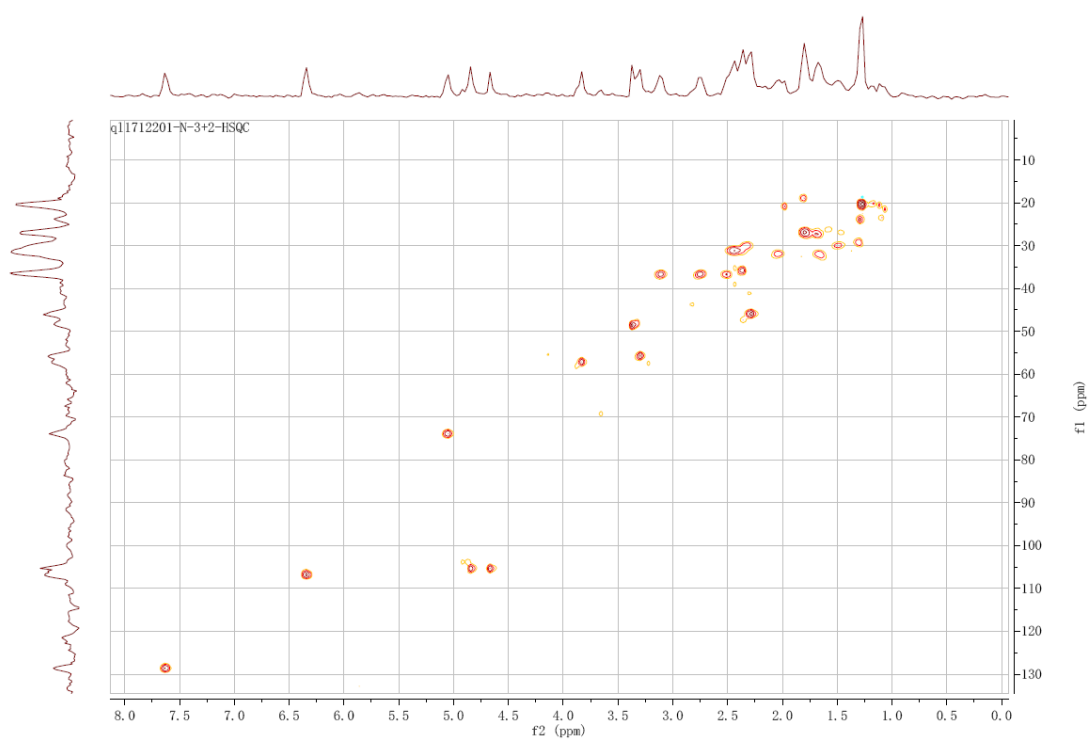

**Figure S35.**  $^1\text{H}$ - $^{13}\text{C}$  HMBC spectrum of **9a** in  $\text{CD}_3\text{OD}$ .

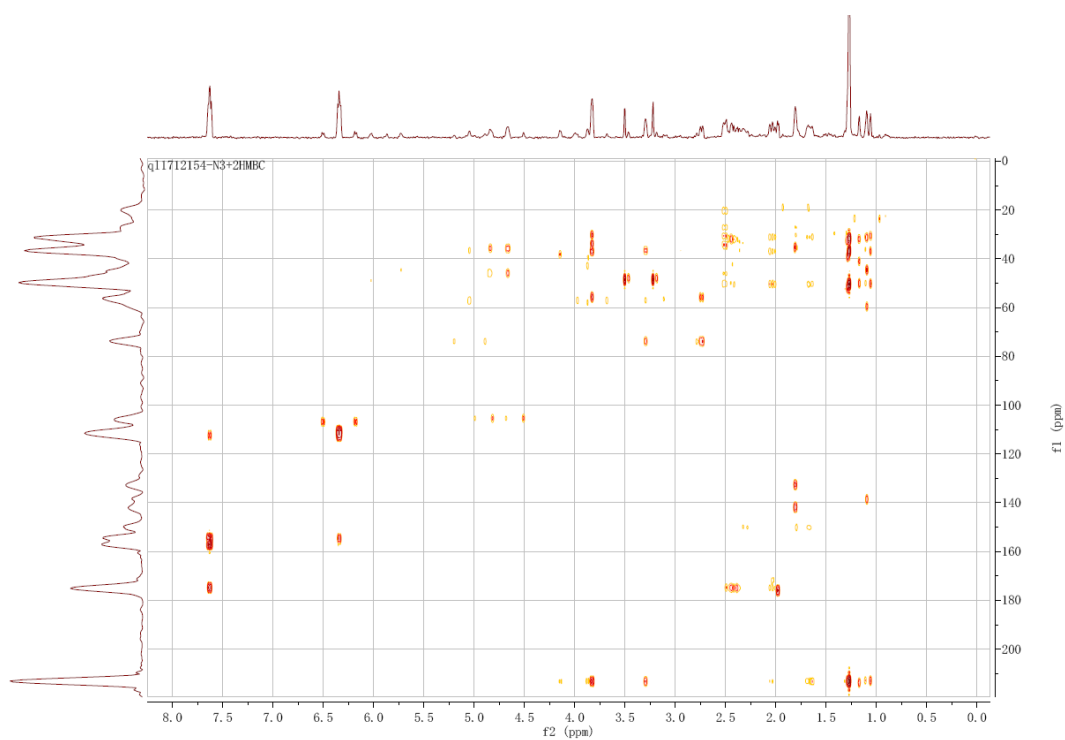

**Figure S36.**  $^1\text{H}$ - $^1\text{H}$  NOESY spectrum of **9a** in  $\text{CD}_3\text{OD}$ .

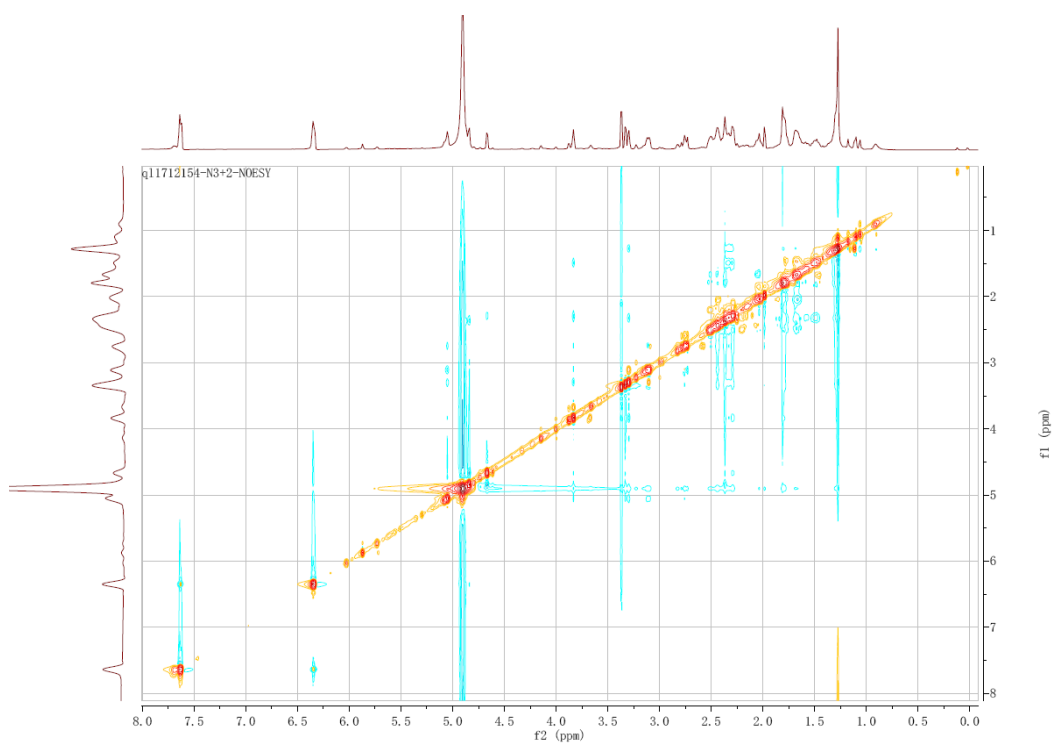

**Figure S37.** Zoomed in  $^1\text{H}$ - $^1\text{H}$  NOESY spectrum of **9a** in  $\text{CD}_3\text{OD}$  (3.0 – 5.5 ppm).

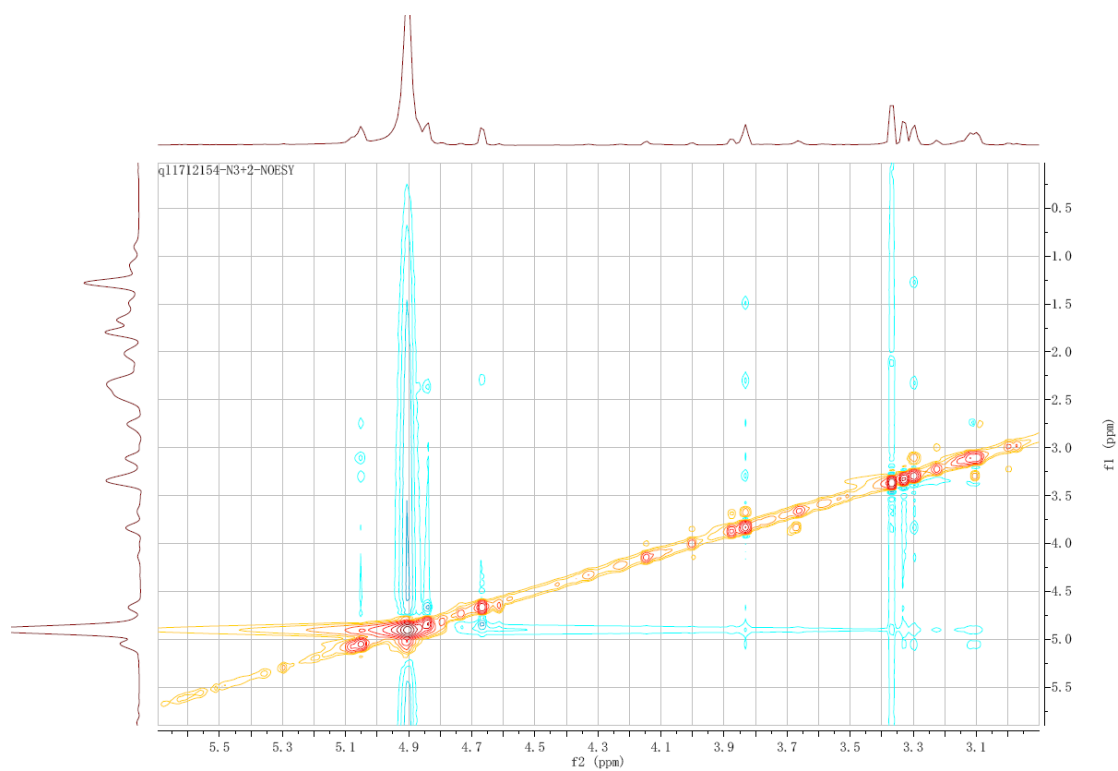

**Figure S38.**  $^1\text{H}$  NMR (400 MHz) and  $^{13}\text{C}$  NMR (101 MHz) spectrum of **2b** in  $\text{CD}_3\text{OD}$ .

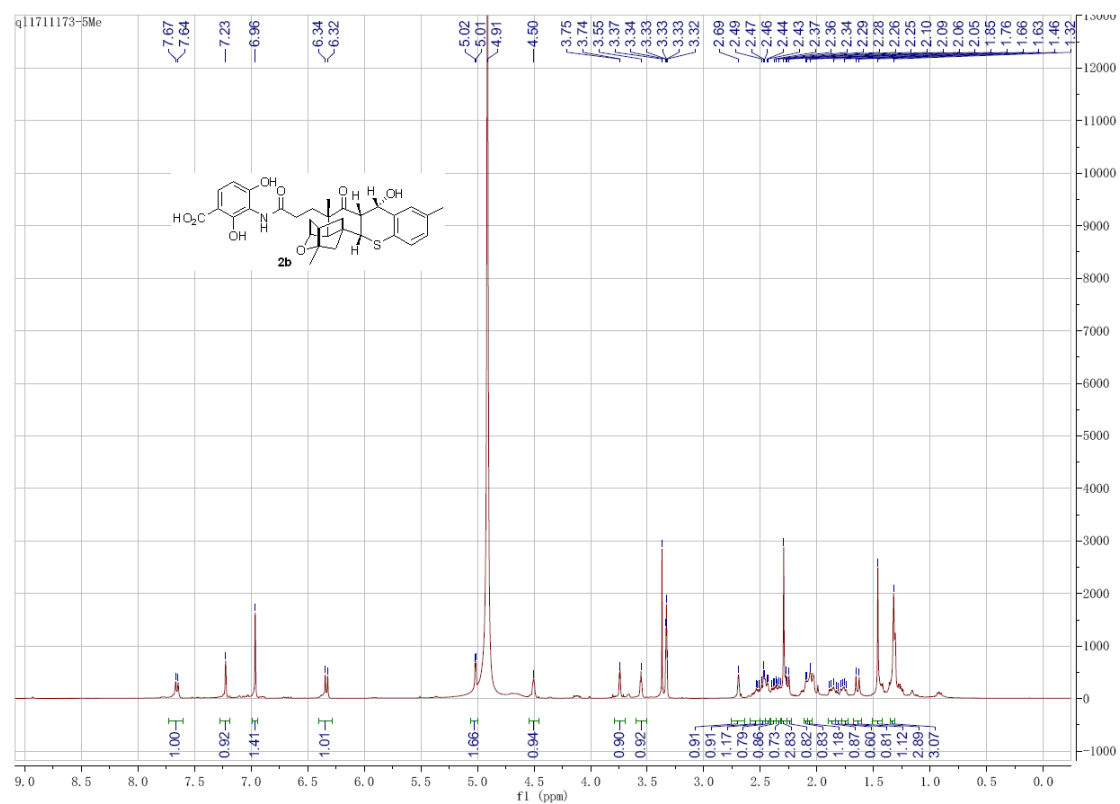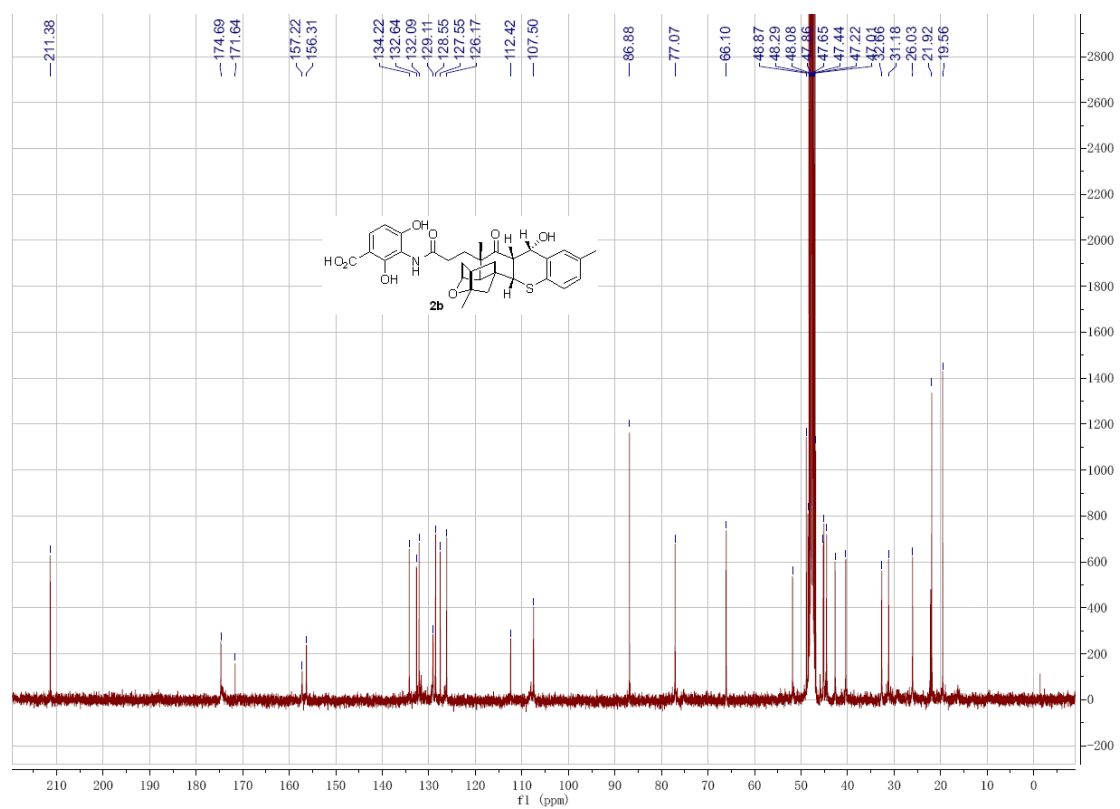

**Figure S39.**  $^1\text{H}$  NMR (400 MHz) and  $^{13}\text{C}$  NMR (101 MHz) spectrum of **2c** in  $\text{CD}_3\text{OD}$ .

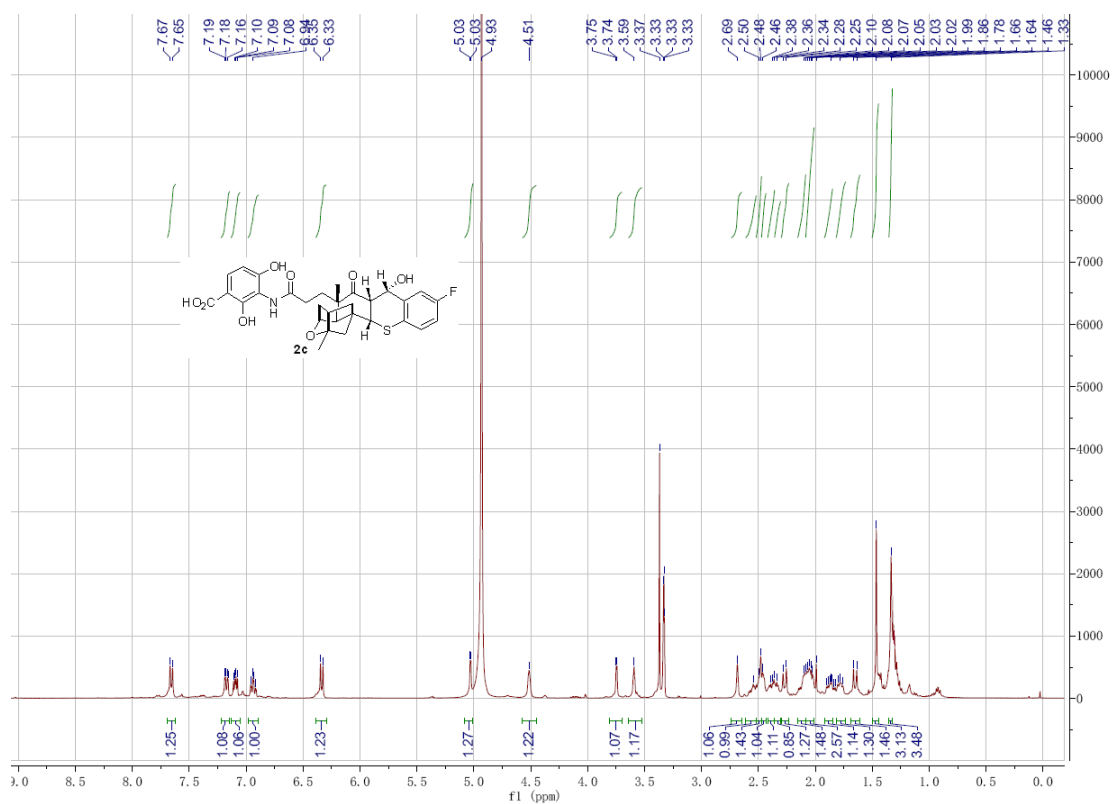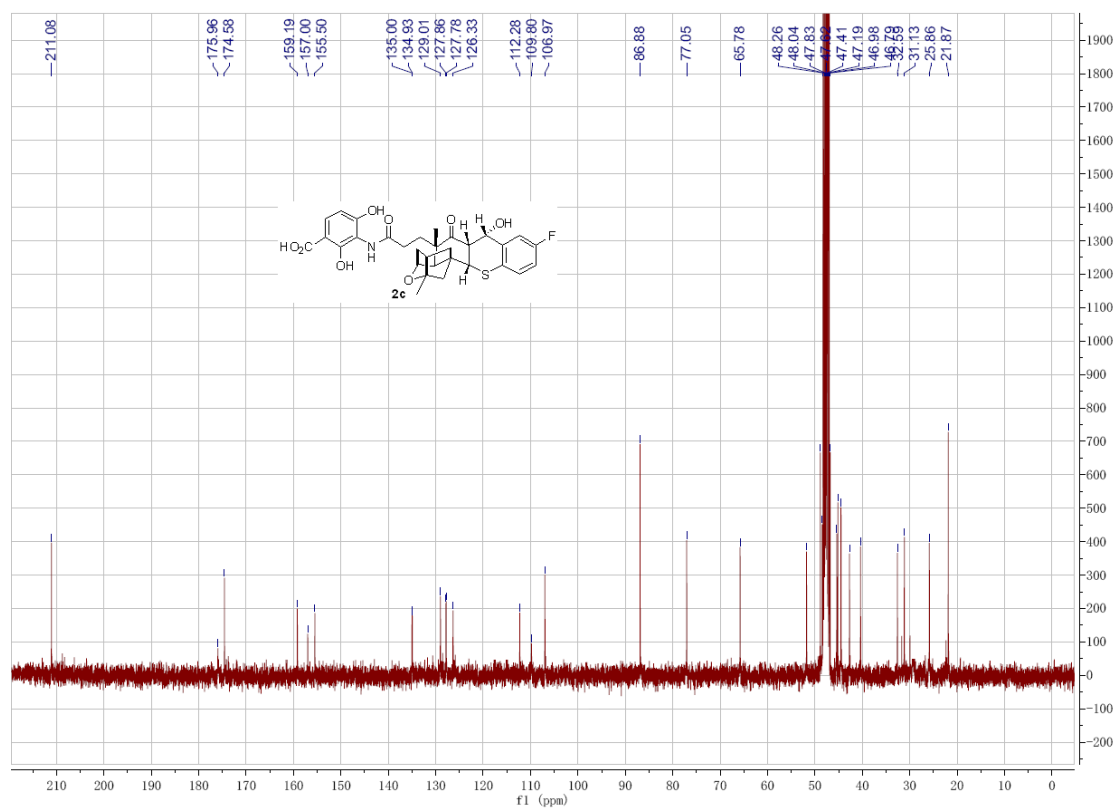



**Figure S40.**  $^1\text{H}$  NMR (400 MHz) and  $^{13}\text{C}$  NMR (101 MHz) spectrum of **2d** in  $\text{CD}_3\text{OD}$ .

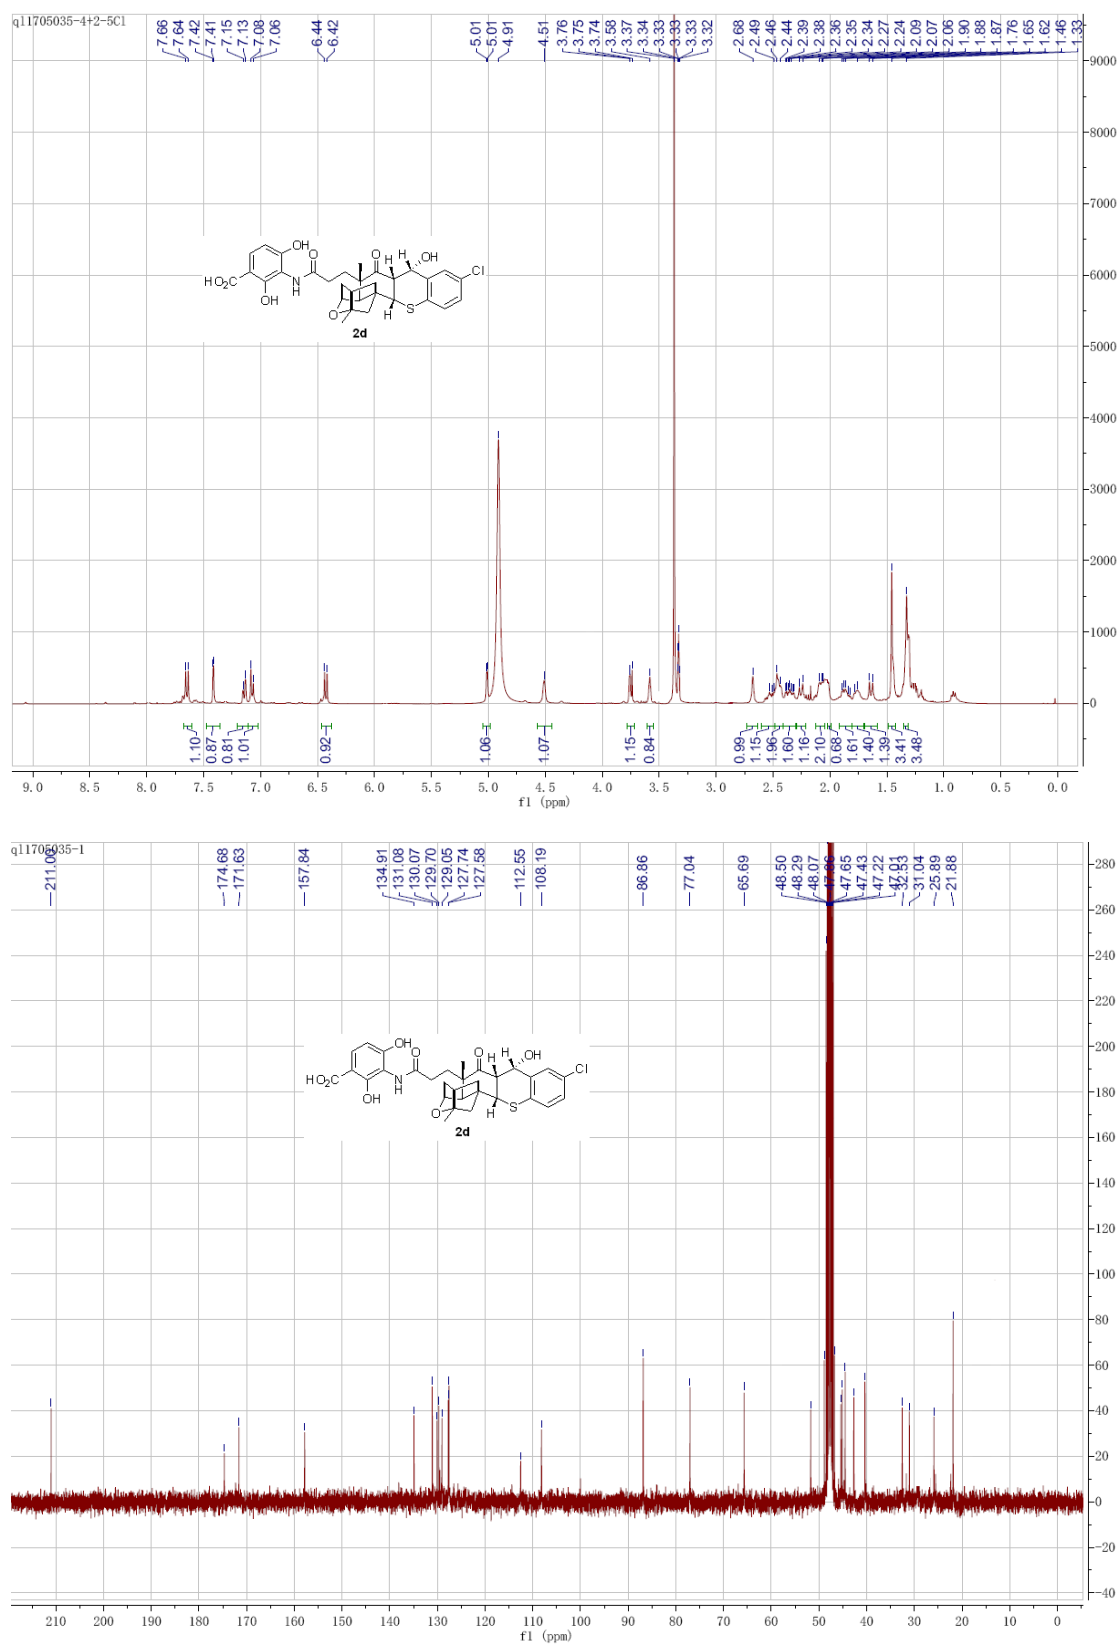

**Figure S41.**  $^1\text{H}$  NMR (500 MHz) and  $^{13}\text{C}$  NMR (126 MHz) spectrum of **2e** in  $\text{CD}_3\text{OD}$ .

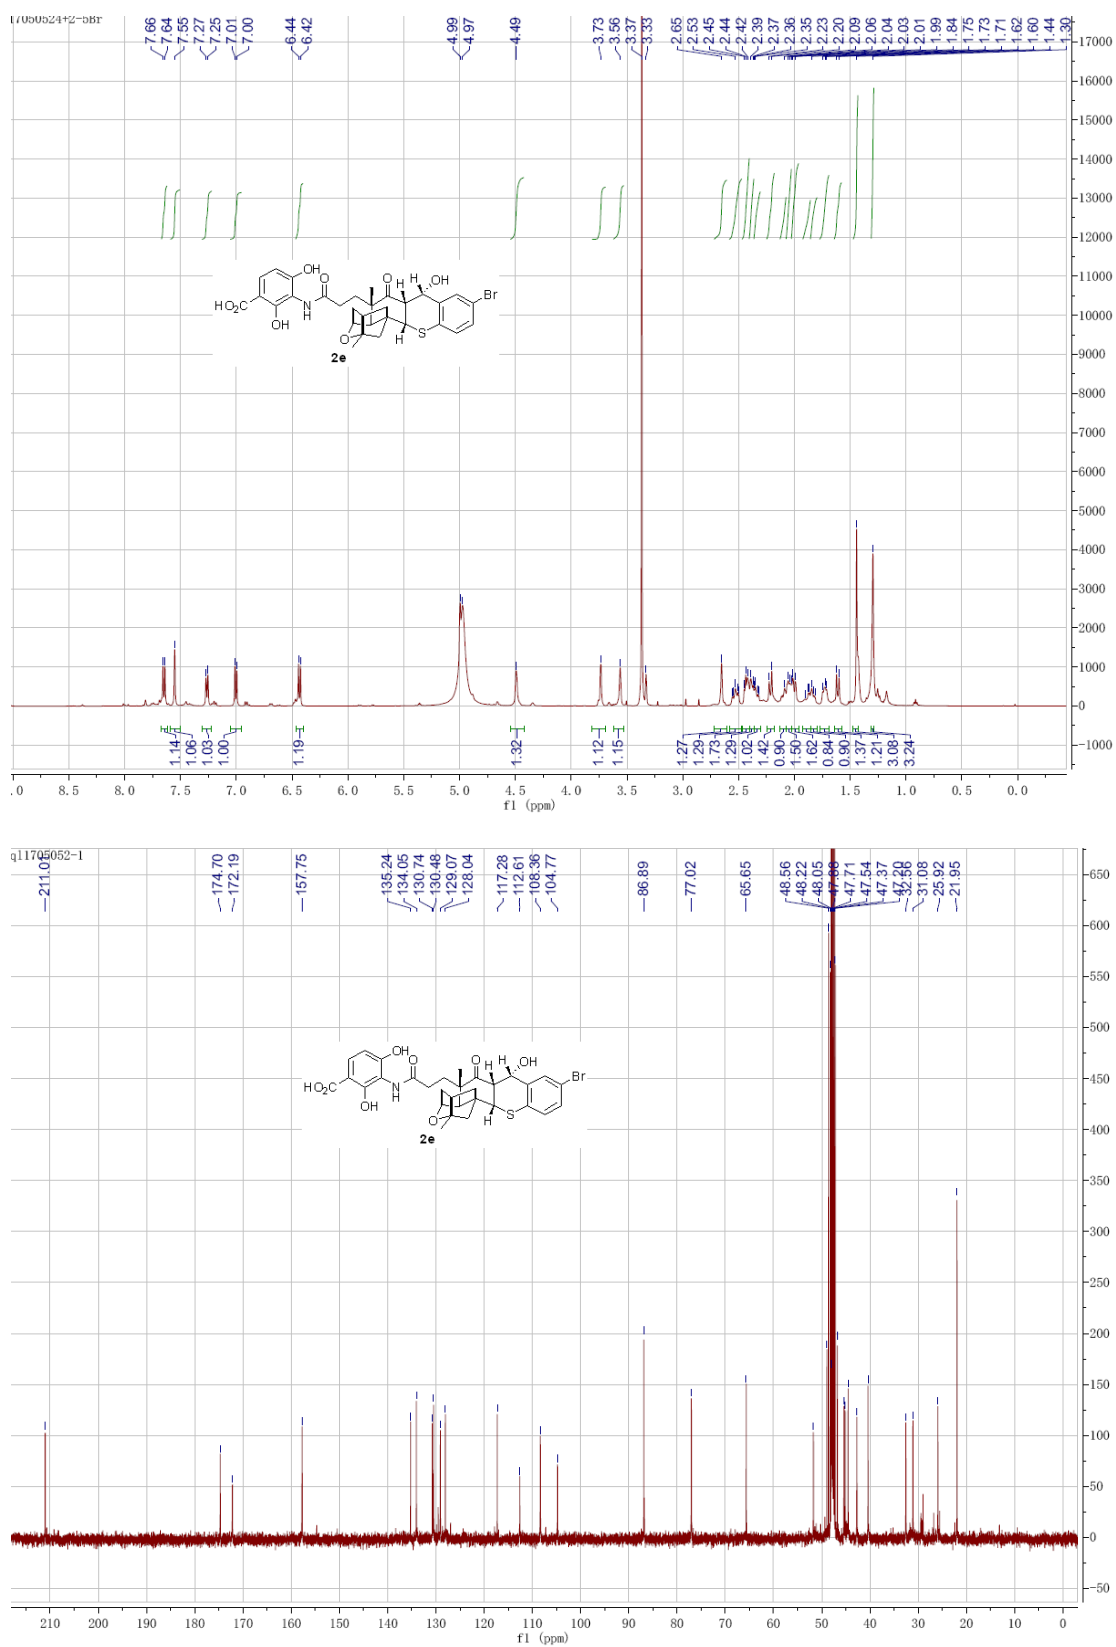

**Figure S42.**  $^1\text{H}$  NMR (500 MHz) and  $^{13}\text{C}$  NMR (126 MHz) spectrum of **2f** in  $\text{CD}_3\text{OD}$ .

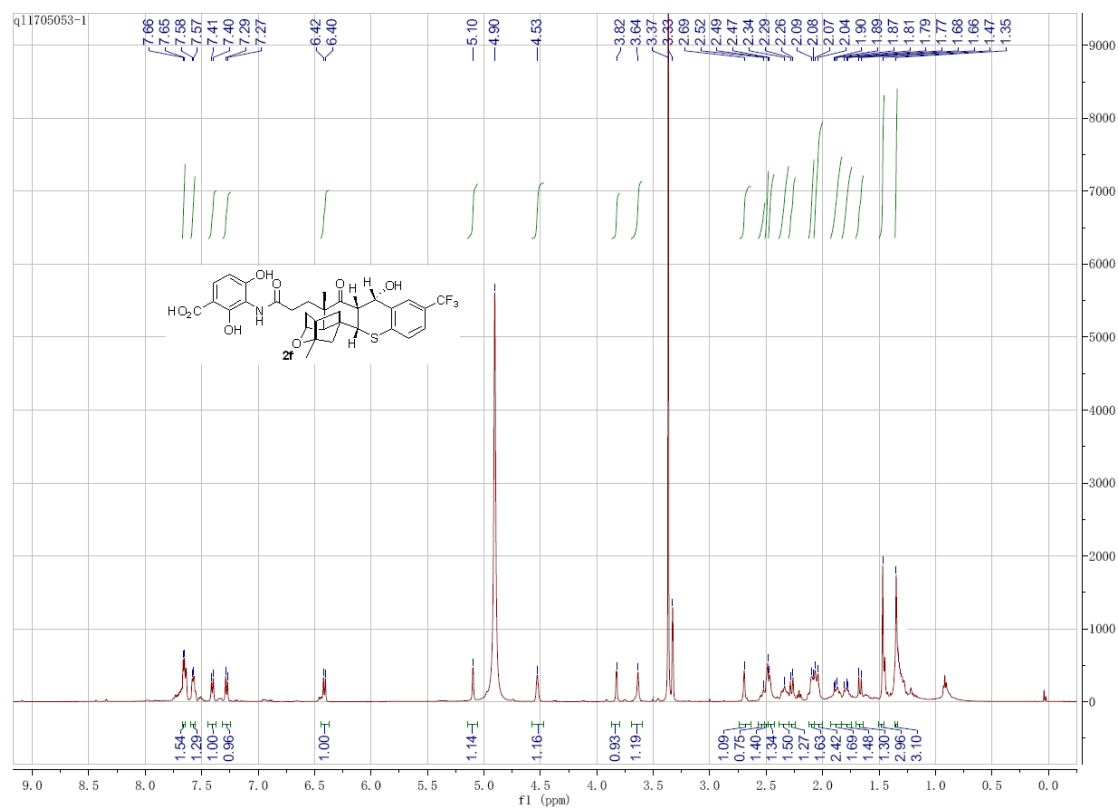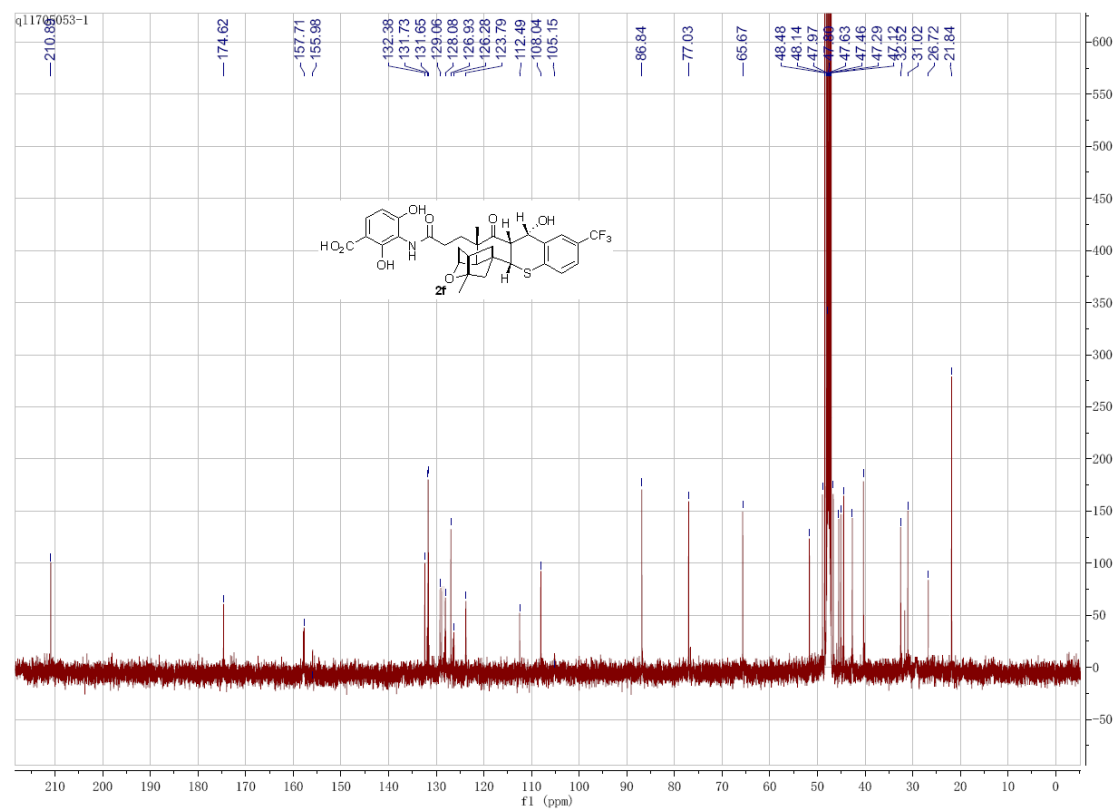

**Figure S43.**  $^1\text{H}$  NMR (400 MHz) and  $^{13}\text{C}$  NMR (101 MHz) spectrum of **10a** in  $\text{CDCl}_3$ .

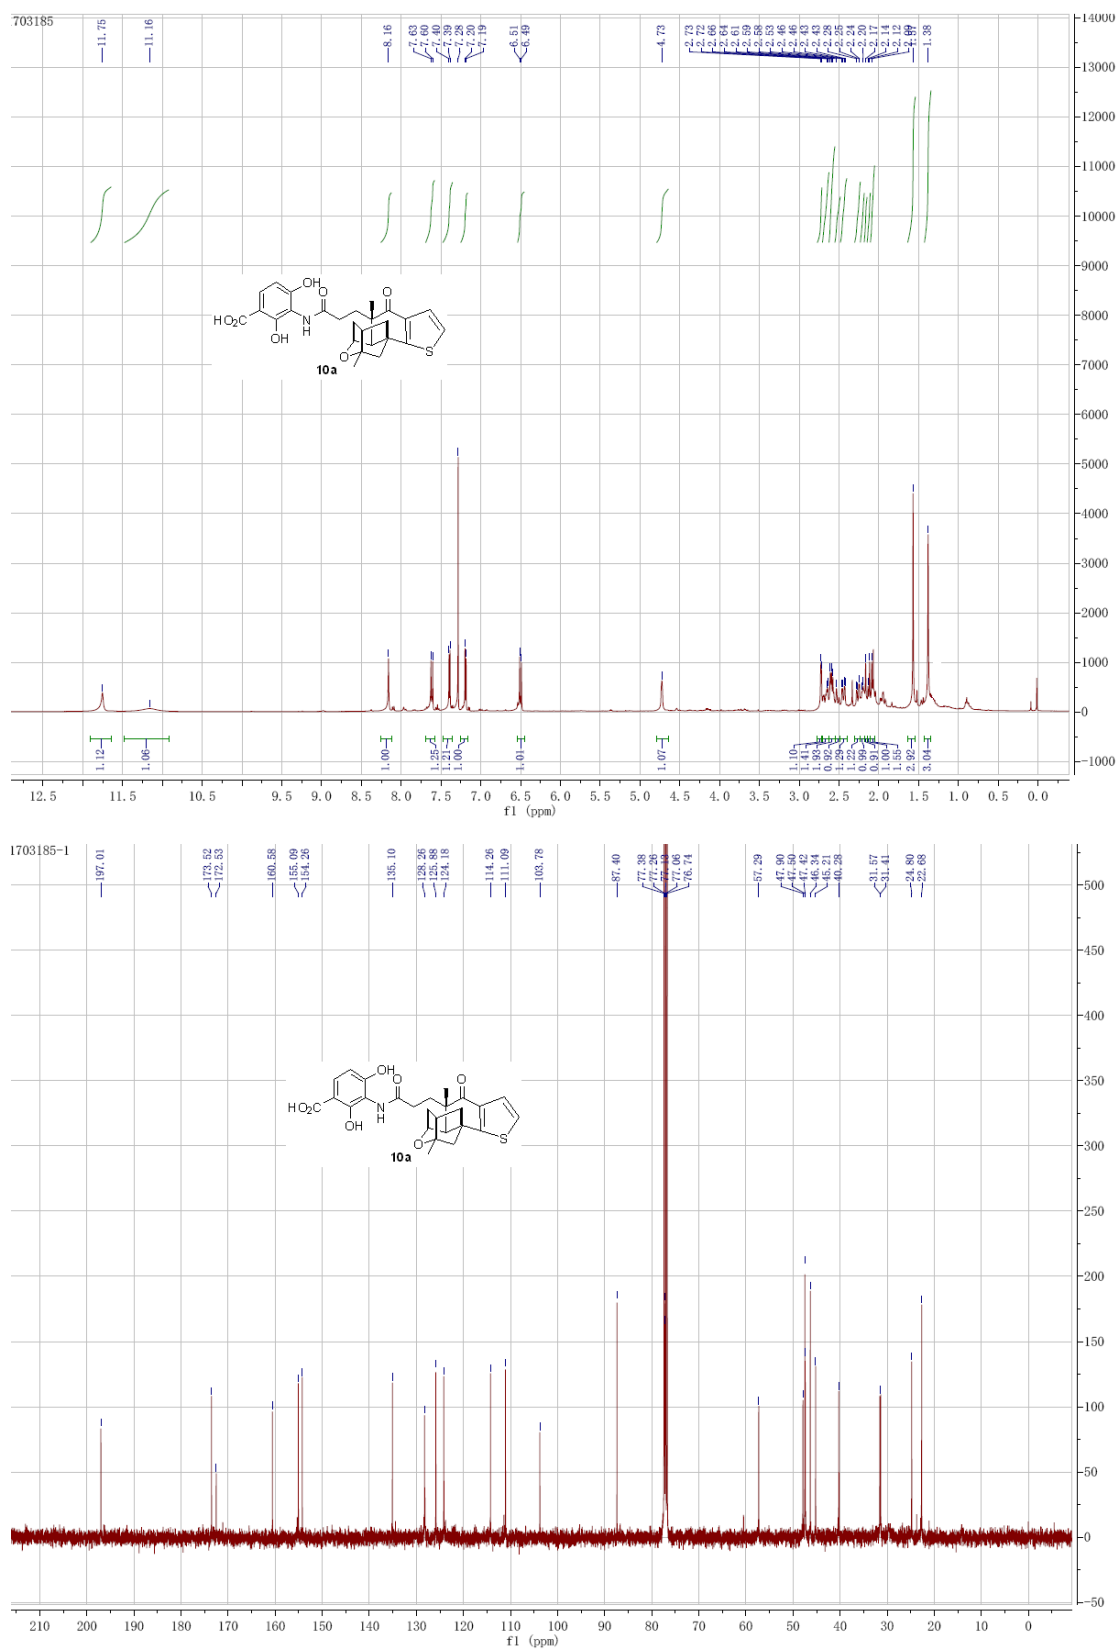

**Figure S44.**  $^1\text{H}$  NMR (500 MHz) and  $^{13}\text{C}$  NMR (126 MHz) spectrum of **11a** in  $\text{CD}_3\text{OD}$ .

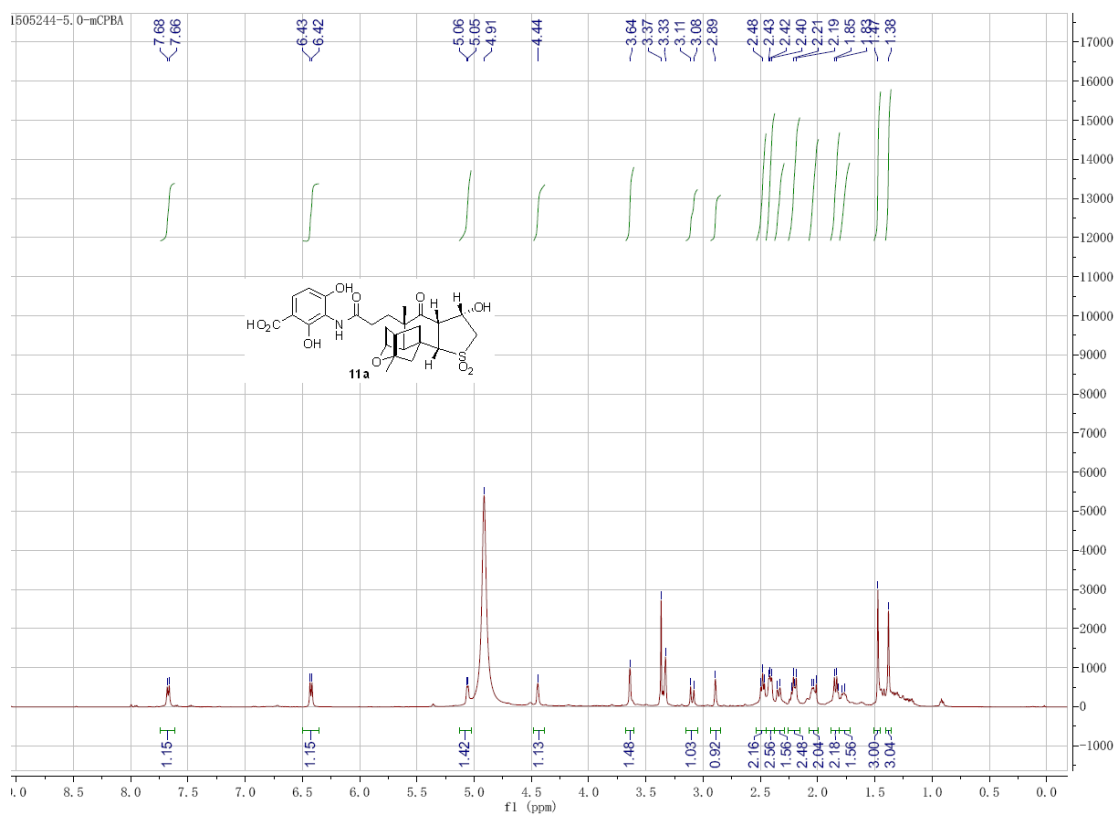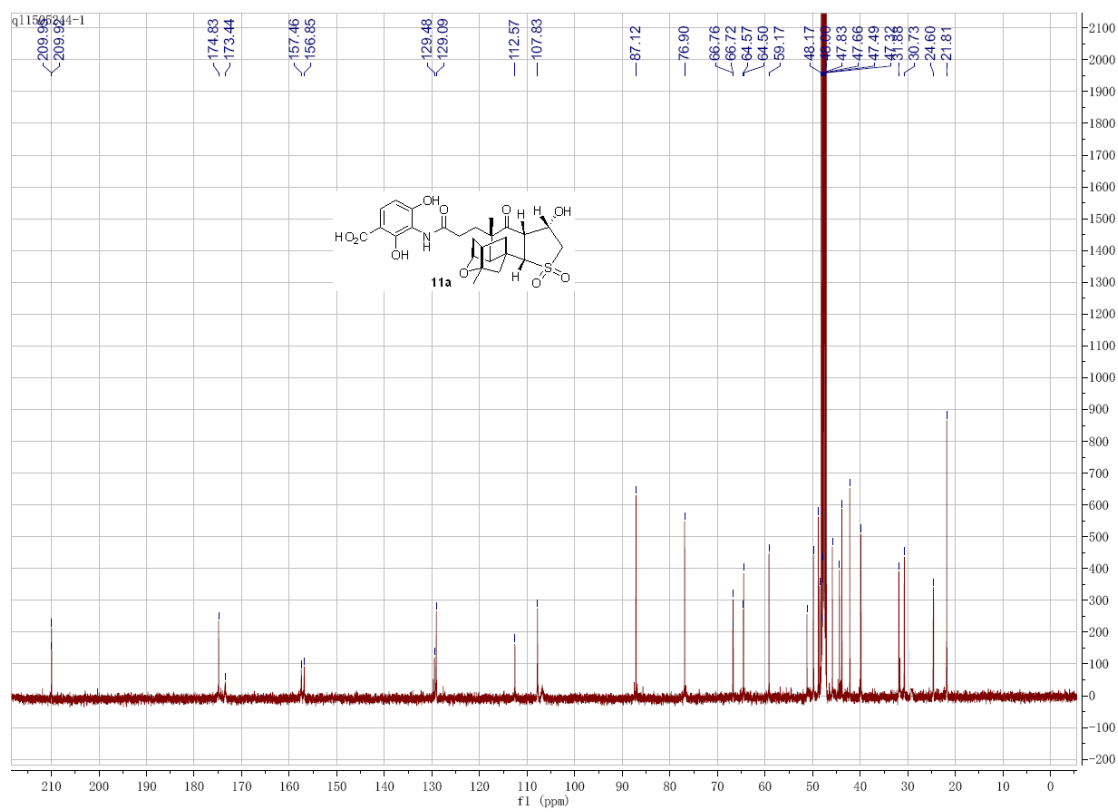

Supplement: c9ob00324j1.pdf [file c9ob00324j1.pdf]
